# Supplementary material
Source: Royal Society of Chemistry journal article supplement (doi:10.1039/d6tc00518g)
Supplement: d6tc00518g1.pdf [file d6tc00518g1.pdf]

## Supporting Information

### Effect of Aromatic Ring Number and Substituent Arrangement on the Properties of Phenanthro[9,10-d]imidazole Derivatives for OLEDs

Agnieszka Krawiec <sup>a</sup>, Jaijanarathanan Lingagouder <sup>b</sup>, Agata Szlapa-Kula <sup>a</sup>, Michał Filapek <sup>a</sup>, Karol Erfurt<sup>c</sup>, Przemysław Data <sup>b,d\*</sup>, Sławomir Kula <sup>a\*</sup>

<sup>a</sup> *Institute of Chemistry, Faculty of Science and Technology, University of Silesia, Szkolna 9 St., 40-007 Katowice, Poland*

<sup>b</sup> *Department of Molecular Physics, Faculty of Chemistry, Lodz University of Technology, 90-543 Lodz, Poland*

<sup>c</sup> *Department of Organic Chemical Technology and Petrochemistry, Faculty of Chemistry, Silesian University of Technology, B. Krzywoustego 4, 44-100 Gliwice, Poland*

<sup>d</sup> *Department of Physics, Durham University, South Road, Durham DH1 3LE, United Kingdom*

|                                                                                          |    |
|------------------------------------------------------------------------------------------|----|
| 1. Materials.....                                                                        | 2  |
| 2. General methods - measurements .....                                                  | 2  |
| 3. Synthesis.....                                                                        | 3  |
| 4. <sup>1</sup> H NMR, <sup>13</sup> C NMR and HRMS spectra.....                         | 7  |
| 5. Thermal properties .....                                                              | 21 |
| 6. Electrochemical properties .....                                                      | 25 |
| 7. DFT calculations .....                                                                | 26 |
| 8. Optical properties .....                                                              | 31 |
| 9. Photoluminescence and electroluminescent properties.....                              | 43 |
| 10. Comparison of the results from this study with data reported in the literature ..... | 44 |
| 11. Literature .....                                                                     | 45 |

## 1. Materials

**Substrates and reactants:** 9,10-Phenanthrene-1,9-dione ( $\geq 99\%$ , Sigma-Aldrich), ammonium acetate (puriss. p.a., ACS reagent, Ph. Eur.,  $\geq 98\%$ , Sigma-Aldrich), benzaldehyde ( $>99.5\%$ , Chemat), biphenyl-4-carboxaldehyde (99%, Sigma Aldrich), 2-naphthaldehyde (95%, Sigma-Aldrich), 1-naphthaldehyde (95%, Sigma-Aldrich), 9-anthracenecarboxaldehyde (97%, Sigma Aldrich), 9-phenanthrenecarboxaldehyde (97%, Sigma-Aldrich), 1-pyrenecarboxaldehyde (99%, Sigma-Aldrich), 3-perylenecarboxaldehyde ( $>95\%$ , TCI). Anthracene-2-carbaldehyde and triphenylene-2-carboxaldehyde were obtained according to the procedures described in the literature [1-2].

**Solvents:** dichloromethane (pure, Chempur), methanol (MeOH, pure p.a., Chempur), acetonitrile (for HPLC-GC,  $\geq 99.8\%$  (GC), Sigma-Aldrich), dichloromethane (for HPLC,  $\geq 99.8\%$ , contains amylene as stabilizer, Sigma-Aldrich), chloroform (for HPLC,  $\geq 99.8\%$ , amylene stabilized, Sigma-Aldrich), methanol (MeOH, pure for analysis, Chempur), DMSO (pure for analysis, Chempur), tetrahydrofuran (pure for analysis, Eurochem BGD, glacial acetic acid (99,5% pure p. a, Chempur), dimethyl sulfoxide- $d_6$  (DMSO- $d_6$ , 99.8 atom % D, Sigma-Aldrich). All reactions were carried out under argon atmosphere.

## 2. General methods - measurements

Bruker NMR spectra were recorded using a Bruker Avance 500 instrument with DMSO- $d_6$  as the solvent. Thermogravimetric analysis (TGA) was performed on a TA-TGA-55 device. UV/Vis spectra were measured using a Perkin Elmer UV-VIS Lambda Bio 40 spectrophotometer, while photoluminescence emission spectra were obtained with a Hitachi Fluorescence Spectrophotometer F-7100. Electrochemical measurements were conducted using an Eco Chemie Autolab PGSTAT128n potentiostat. A glassy carbon electrode (2 mm diameter) served as the working electrode, while a platinum coil and a silver wire were used as the auxiliary and reference electrodes, respectively. All potentials were referenced against ferrocene (Fc), which was employed as an internal standard. Cyclic and differential pulse voltammetry experiments were carried out in a standard one-compartment cell using dichloromethane (DCM) (Carlo Erba, HPLC grade) as the solvent, under an argon atmosphere. A 0.2 M solution of  $Bu_4NPF_6$  (Aldrich, 99%) was used as the supporting electrolyte.

### 3. Synthesis

A mixture of aldehyde (6.00 mmol) (benzaldehyde (**0A**), biphenyl-4-carboxaldehyde (**0B**), 2-naphthaldehyde (**0C**), 1-naphthaldehyde (**0D**), 9-anthracenecarboxaldehyde (**0E**), 9-phenanthrenecarboxaldehyde (**0F**), anthracene-2-carbaldehyde (**0G**), triphenylene-2-carboxaldehyde (**0H**), 1-pyrenecarboxaldehyde (**0I**), 3-perylenecarboxaldehyde (**0J**)), 9,10-phenanthrene-1,10-dione (1.25 g, 6.00 mmol), ammonium acetate (7.75 g, 100.00 mmol) and acetic acid (45 mL) was heated at reflux under argon atmosphere. After 24h, the solid was collected by filtration and washed with distilled water. Crude product was purified by double crystallization using methanol as solvent.

#### 2-(phenyl)-1*H*-phenanthro[9,10-*d*]-imidazole (**0A**)

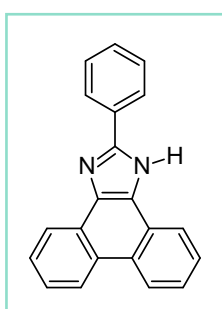

**0A** was obtained as brown solid with **63%** yield.  $^1\text{H NMR}$  (500 MHz, DMSO)  $\delta$  13.46 (s, 1H), 8.90 – 8.81 (m, 2H), 8.63 – 8.54 (m, 2H), 8.35 – 8.30 (m, 2H), 7.79 – 7.70 (m, 2H), 7.68 – 7.57 (m, 4H), 7.54 – 7.47 (m, 1H).  $^{13}\text{C NMR}$  (125 MHz, DMSO)  $\delta$  149.11, 136.99, 130.39, 129.25, 128.95, 127.70, 127.68, 127.54, 127.17, 127.08, 126.99, 126.15, 125.37, 125.16, 124.11, 123.75, 122.43, 122.00, 121.90. **HRMS (ESI)**: calcd. for  $\text{C}_{21}\text{H}_{15}\text{N}_2$   $[\text{M}+\text{H}]^+$  295.1235, found 295.1252.

#### 2-(biphenyl-1-yl)-1*H*-phenanthro[9,10-*d*]-imidazole (**0B**)

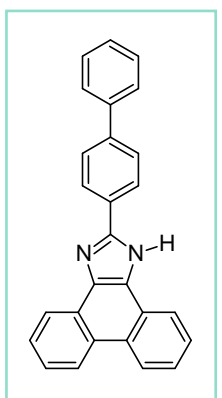

**0B** was obtained as brown solid with **83%** yield.  $^1\text{H NMR}$  (500 MHz, DMSO)  $\delta$  13.52 (s, 1H), 8.87 (dd,  $J = 17.5, 8.1$  Hz, 2H), 8.62 (dd,  $J = 8.0, 1.4$  Hz, 1H), 8.58 (dd,  $J = 8.0, 1.4$  Hz, 1H), 8.42 (d,  $J = 8.5$  Hz, 2H), 7.95 – 7.90 (m, 2H), 7.83 – 7.71 (m, 4H), 7.69 – 7.61 (m, 2H), 7.56 – 7.48 (m, 2H), 7.45 – 7.38 (m, 1H).  $^{13}\text{C NMR}$  (125 MHz, DMSO)  $\delta$  148.81, 140.65, 139.37, 137.12, 129.38, 129.04, 127.83, 127.78, 127.73, 127.57, 127.19, 127.14, 127.10, 126.97, 126.69, 126.67, 125.41, 125.20, 124.13, 123.77, 122.41, 122.03, 121.92. **HRMS (ESI)**: calcd. for  $\text{C}_{27}\text{H}_{19}\text{N}_2$   $[\text{M}+\text{H}]^+$  371.1548, found 371.1551.

### 2-(naphthalen-1-yl)-1*H*-phenanthro[9,10-*d*]-imidazole (0C)

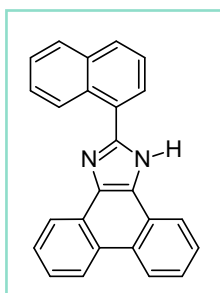

**0C** was obtained as brown solid with **65%** yield. **<sup>1</sup>H NMR (500 MHz, DMSO)**  $\delta$  13.66 (s, 1H), 9.20 (d, *J* = 8.5 Hz, 1H), 8.94 – 8.86 (m, 2H), 8.67 (d, *J* = 7.9 Hz, 1H), 8.58 (d, *J* = 8.0 Hz, 1H), 8.18 – 8.11 (m, 2H), 8.09 (d, *J* = 8.1 Hz, 1H), 7.80 – 7.73 (m, 3H), 7.73 – 7.62 (m, 4H). **<sup>13</sup>C NMR (125 MHz, DMSO)**  $\delta$  149.03, 137.00, 133.68, 130.63, 129.79, 128.42, 127.79, 127.79, 127.73, 127.51, 127.27, 127.24, 127.12, 127.09, 126.42, 126.36, 125.44, 125.31, 125.16, 124.12, 123.80, 122.43, 122.12, 121.93. **HRMS (ESI):** calcd. for C<sub>25</sub>H<sub>17</sub>N<sub>2</sub> [M+H]<sup>+</sup> 345.1392, found 345.1416.

### 2-(naphthalen-2-yl)-1*H*-phenanthro[9,10-*d*]-imidazole (0D)

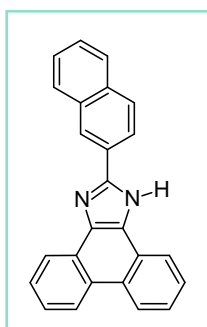

**0D** was obtained as brown solid with **60%** yield. **<sup>1</sup>H NMR (500 MHz, DMSO)**  $\delta$  13.63 (s, 1H), 8.93 – 8.85 (m, 3H), 8.65 (dd, *J* = 7.9, 1.2 Hz, 1H), 8.61 (dd, *J* = 8.3, 1.0 Hz, 1H), 8.48 (dd, *J* = 8.6, 1.7 Hz, 1H), 8.17 – 8.08 (m, 2H), 8.02 (d, *J* = 7.7 Hz, 1H), 7.82 – 7.72 (m, 2H), 7.70 – 7.57 (m, 4H). **<sup>13</sup>C NMR (125 MHz, DMSO)**  $\delta$  149.11, 137.17, 133.20, 132.98, 128.56, 128.34, 127.90, 127.86, 127.84, 127.79, 127.60, 127.23, 127.14, 126.99, 126.96, 126.86, 125.46, 125.23, 125.00, 124.16, 124.02, 123.79, 122.42, 122.04, 121.93. **HRMS (ESI):** calcd. for C<sub>25</sub>H<sub>17</sub>N<sub>2</sub> [M+H]<sup>+</sup> 345.1392, found 345.1394.

### 2-(anthracen-9-yl)-1*H*-phenanthro[9,10-*d*]-imidazole (0E)

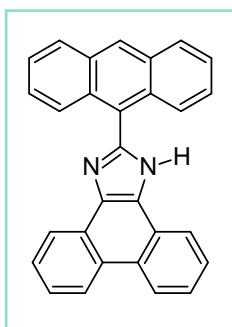

**0E** was obtained as brown solid with **41%** yield. **<sup>1</sup>H NMR (500 MHz, DMSO)**  $\delta$  13.91 (s, 1H), 8.99 – 8.89 (m, 3H), 8.62 (dd, *J* = 8.0, 1.3 Hz, 1H), 8.40 (dd, *J* = 7.9, 1.3 Hz, 1H), 8.26 (d, *J* = 8.5 Hz, 2H), 7.81 (dd, *J* = 8.8, 1.0 Hz, 2H), 7.78 – 7.71 (m, 2H), 7.71 – 7.67 (m, 2H), 7.65 – 7.58 (m, 2H), 7.57 – 7.52 (m, 2H). **<sup>13</sup>C NMR (125 MHz, DMSO)**  $\delta$  147.32, 137.37, 131.49, 131.22, 129.27, 129.01, 128.19, 128.02, 127.94, 127.71, 127.69, 127.66, 127.41, 126.50, 126.26, 126.20, 125.90, 125.62, 124.67, 124.32, 123.01, 122.49, 122.29. **HRMS (ESI):** calcd. for C<sub>29</sub>H<sub>19</sub>N<sub>2</sub> [M+H]<sup>+</sup> 395.1548, found 395.1549.

### 2-(phenanthren-9-yl)-1*H*-phenanthro[9,10-*d*]-imidazole (0F)

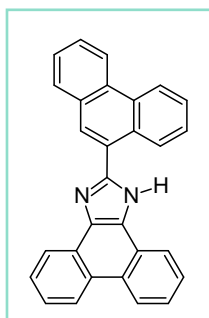

**0F** was obtained as brown solid with **81%** yield. **<sup>1</sup>H NMR (500 MHz, DMSO) δ** 13.80 (s, 1H), 9.19 – 9.13 (m, 1H), 9.05 – 8.99 (m, 1H), 8.99 – 8.88 (m, 3H), 8.67 (dd, *J* = 8.1, 1.5 Hz, 1H), 8.59 (dd, *J* = 8.0, 1.4 Hz, 1H), 8.48 (s, 1H), 8.20 (dd, *J* = 7.8, 1.5 Hz, 1H), 7.86 – 7.74 (m, 6H), 7.73 – 7.65 (m, 2H). **<sup>13</sup>C NMR (125 MHz, DMSO) δ** 149.37, 137.46, 131.05, 130.82, 130.61, 129.84, 129.56, 129.52, 128.48, 128.26, 128.03, 127.92, 127.80, 127.73, 127.65, 127.62, 127.60, 127.25, 125.95, 125.67, 124.63, 124.29, 123.79, 123.52, 122.93, 122.58, 122.44. **HRMS (ESI):** calcd. for C<sub>29</sub>H<sub>19</sub>N<sub>2</sub> [M+H]<sup>+</sup> 395.1548, found 395.1563.

### 2-(anthracen-2-yl)-1*H*-phenanthro[9,10-*d*]-imidazole (0G)

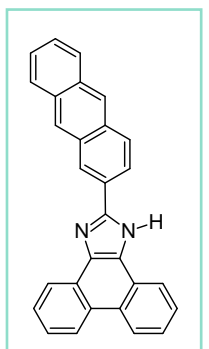

**0G** was obtained as brown solid with **95%** yield. **<sup>1</sup>H NMR (500 MHz, DMSO) δ** 13.71 (s, 1H), 9.02 (s, 1H), 8.94 – 8.86 (m, 2H), 8.78 – 8.76 (m, 1H), 8.70 – 8.67 (m, 2H), 8.64 (dd, *J* = 8.0, 1.4 Hz, 1H), 8.49 (dd, *J* = 8.8, 1.7 Hz, 1H), 8.34 – 8.29 (m, 1H), 8.25 – 8.18 (m, 1H), 8.18 – 8.10 (m, 1H), 7.85 – 7.74 (m, 2H), 7.72 – 7.64 (m, 2H), 7.62 – 7.54 (m, 2H). **<sup>13</sup>C NMR (125 MHz, DMSO) δ** 149.59, 137.74, 132.35, 132.26, 131.50, 131.43, 129.36, 128.70, 128.63, 128.49, 128.32, 128.10, 127.77, 127.73, 127.64, 127.45, 127.31, 126.73, 126.53, 126.45, 126.00, 125.75, 125.53, 124.65, 124.26, 122.87, 122.58, 122.43. **HRMS (ESI):** calcd. for C<sub>29</sub>H<sub>19</sub>N<sub>2</sub> [M+H]<sup>+</sup> 395.1548, found 395.1557.

### 2-(triphenylen-2-yl)-1*H*-phenanthro[9,10-*d*]-imidazole (0H)

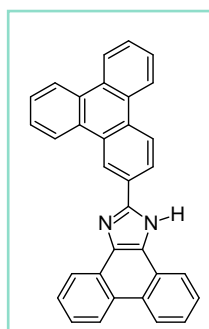

**0H** was obtained as brown solid with **77%** yield. **<sup>1</sup>H NMR (500 MHz, DMSO) δ** 13.73 (s, 1H), 9.68 (s, 1H), 9.06 (dd, *J* = 8.3, 2.8 Hz, 2H), 8.96 – 8.86 (m, 5H), 8.74 – 8.67 (m, 2H), 8.63 (d, *J* = 7.4 Hz, 1H), 7.93 – 7.87 (m, 1H), 7.87 – 7.74 (m, 5H), 7.74 – 7.65 (m, 2H). **<sup>13</sup>C NMR (125 MHz, DMSO) δ** 149.03, 137.00, 133.68, 130.63, 129.79, 128.42, 127.79, 127.79, 127.73, 127.51, 127.27, 127.24, 127.12, 127.09, 126.42, 126.36, 125.44, 125.31, 125.16, 124.12, 123.80, 122.43, 122.12, 121.93. **HRMS (ESI):** calcd. for C<sub>33</sub>H<sub>21</sub>N<sub>2</sub> [M+H]<sup>+</sup> 445.1705, found 445.1713.

### 2-(pyren-1-yl)-1*H*-phenanthro[9,10-*d*]-imidazole (**0I**)

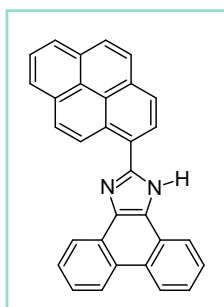

**0I** was obtained as brown solid with **91%** yield.  $^1\text{H NMR}$  (**500 MHz, DMSO**)  $\delta$  13.83 (s, 1H), 9.62 (d,  $J = 9.3$  Hz, 1H), 8.96 – 8.88 (m, 2H), 8.76 (dd,  $J = 7.9, 1.4$  Hz, 1H), 8.71 (d,  $J = 8.0$  Hz, 1H), 8.66 (dd,  $J = 8.0, 1.4$  Hz, 1H), 8.54 (d,  $J = 8.0$  Hz, 1H), 8.42 – 8.36 (m, 3H), 8.31 (s, 2H), 8.16 (t,  $J = 7.6$  Hz, 1H), 7.83 – 7.76 (m, 2H), 7.73 – 7.66 (m, 2H).  $^{13}\text{C NMR}$  (**125 MHz, DMSO**)  $\delta$  149.92, 137.84, 131.86, 131.45, 130.88, 129.04, 128.94, 128.82, 128.29, 128.18, 128.09, 127.90, 127.85, 127.78, 127.64, 127.59, 127.16, 126.33, 126.23, 126.00, 125.74, 125.35, 125.30, 124.91, 124.64, 124.32, 124.28, 122.93, 122.72, 122.52. **HRMS (ESI)**: calcd. for  $\text{C}_{31}\text{H}_{19}\text{N}_2$   $[\text{M}+\text{H}]^+$  419.1548, found 419.1554.

### 2-(perylene-3-yl)-1*H*-phenanthro[9,10-*d*]-imidazole (**0J**)

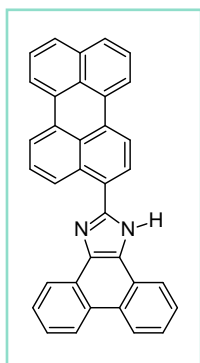

**0J** was obtained as brown solid with **23%** yield.  $^1\text{H NMR}$  (**500 MHz, DMSO**)  $\delta$  13.70 (s, 1H), 9.23 (dd,  $J = 8.5, 0.9$  Hz, 1H), 8.91 (dd,  $J = 16.6, 8.3$  Hz, 2H), 8.68 (dd,  $J = 8.0, 1.4$  Hz, 1H), 8.64 – 8.58 (m, 2H), 8.54 (ddd,  $J = 7.9, 3.8, 1.1$  Hz, 2H), 8.48 (d, 1H), 8.19 (d,  $J = 7.9$  Hz, 1H), 7.88 (dd,  $J = 11.0, 8.1$  Hz, 2H), 7.81 – 7.72 (m, 3H), 7.72 – 7.66 (m, 2H), 7.62 (dt,  $J = 8.7, 7.7$  Hz, 2H).  $^{13}\text{C NMR}$  (**125 MHz, DMSO**)  $\delta$  149.36, 137.60, 134.71, 132.49, 132.22, 131.16, 131.02, 130.58, 129.07, 129.02, 128.61, 128.27, 128.22, 128.17, 128.04, 127.82, 127.74, 127.60, 127.51, 127.22, 126.00, 125.72, 124.62, 124.29, 122.84, 122.68, 122.46, 122.03, 121.76, 121.71, 120.75. **HRMS (ESI)**: calcd. for  $\text{C}_{35}\text{H}_{21}\text{N}_2$   $[\text{M}+\text{H}]^+$  469.1705, found 469.1707.

#### 4. $^1\text{H}$ NMR, $^{13}\text{C}$ NMR and HRMS spectra

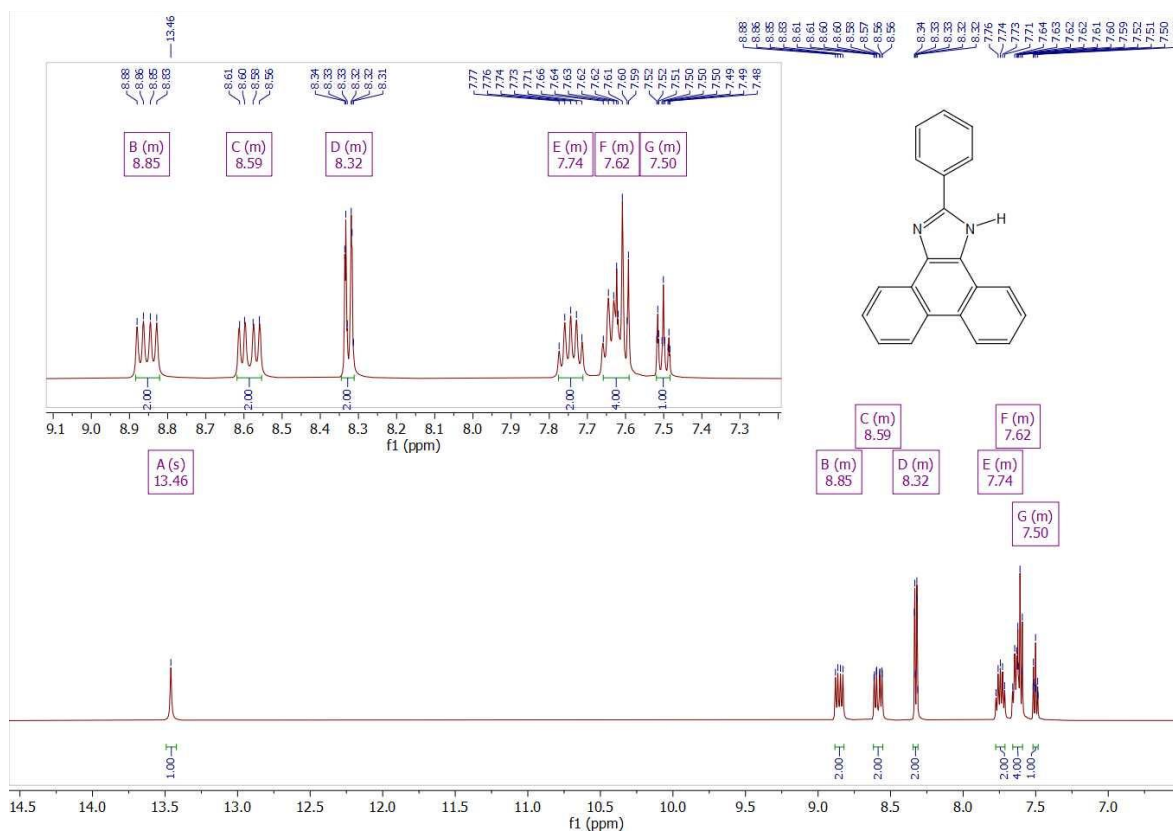

$^1\text{H}$  NMR of 0A

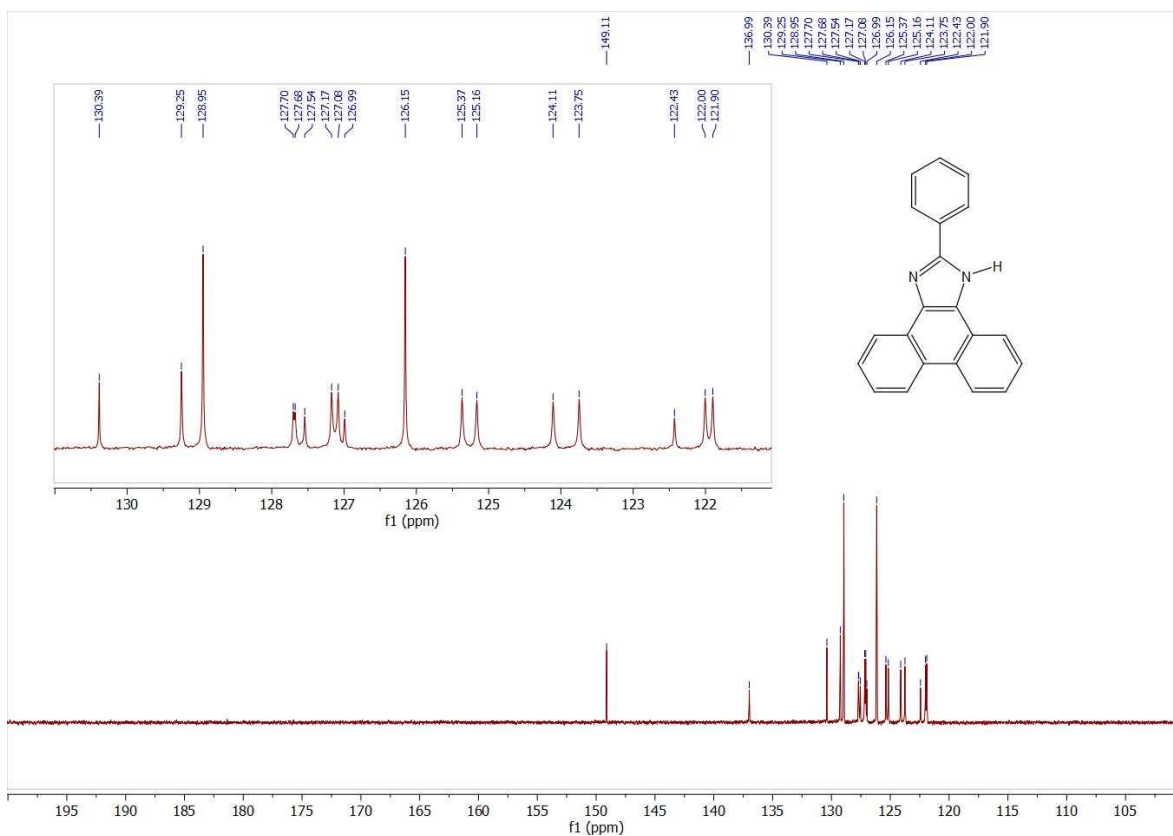

$^{13}\text{C}$  NMR of 0A

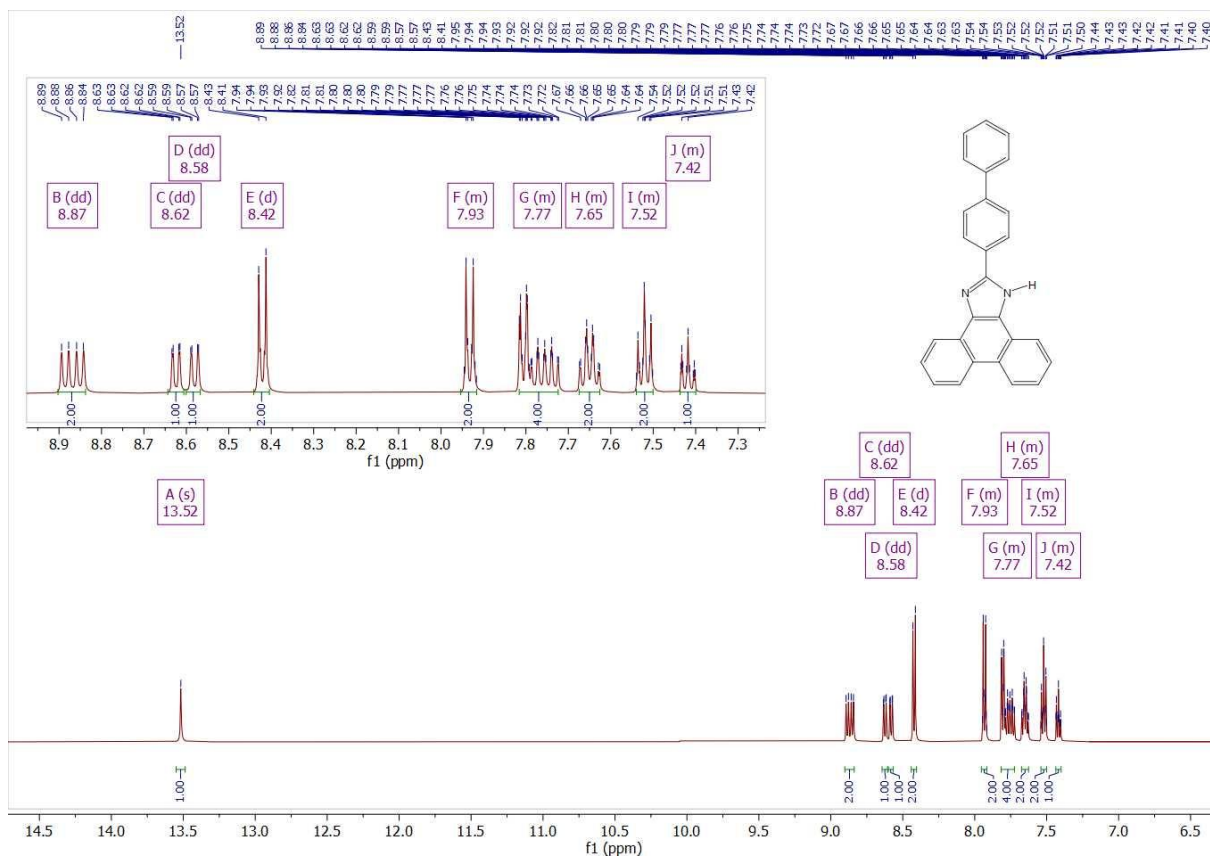

**<sup>1</sup>H NMR of 0B**

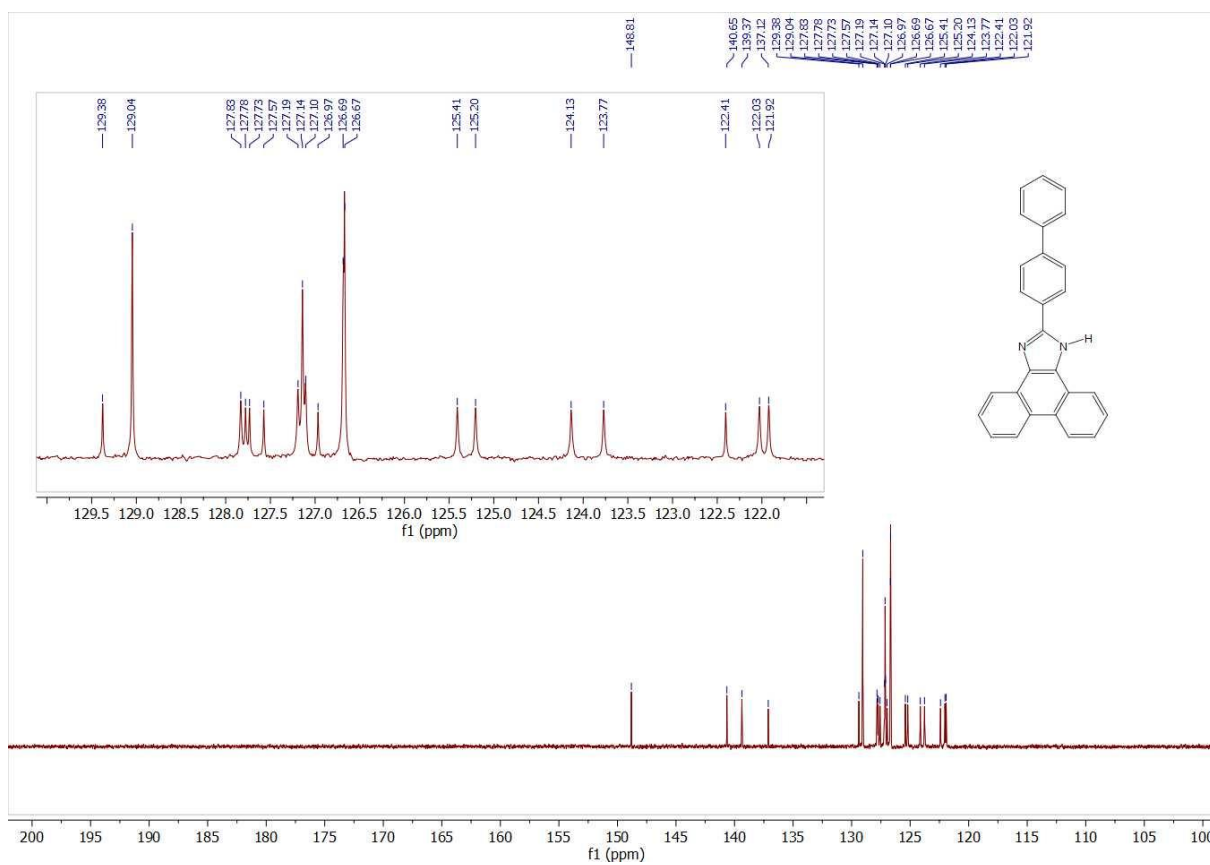

**<sup>13</sup>C NMR of 0B**

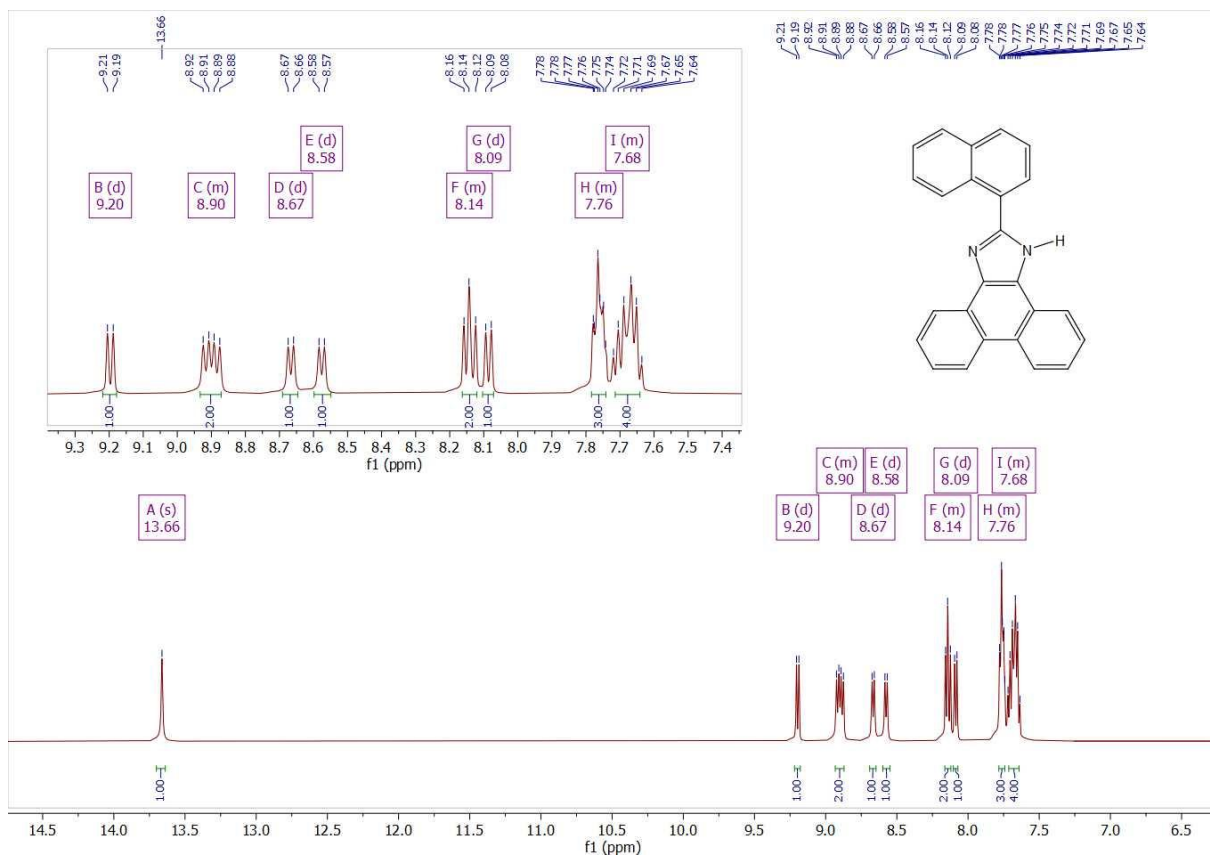

**<sup>1</sup>H NMR of 0C**

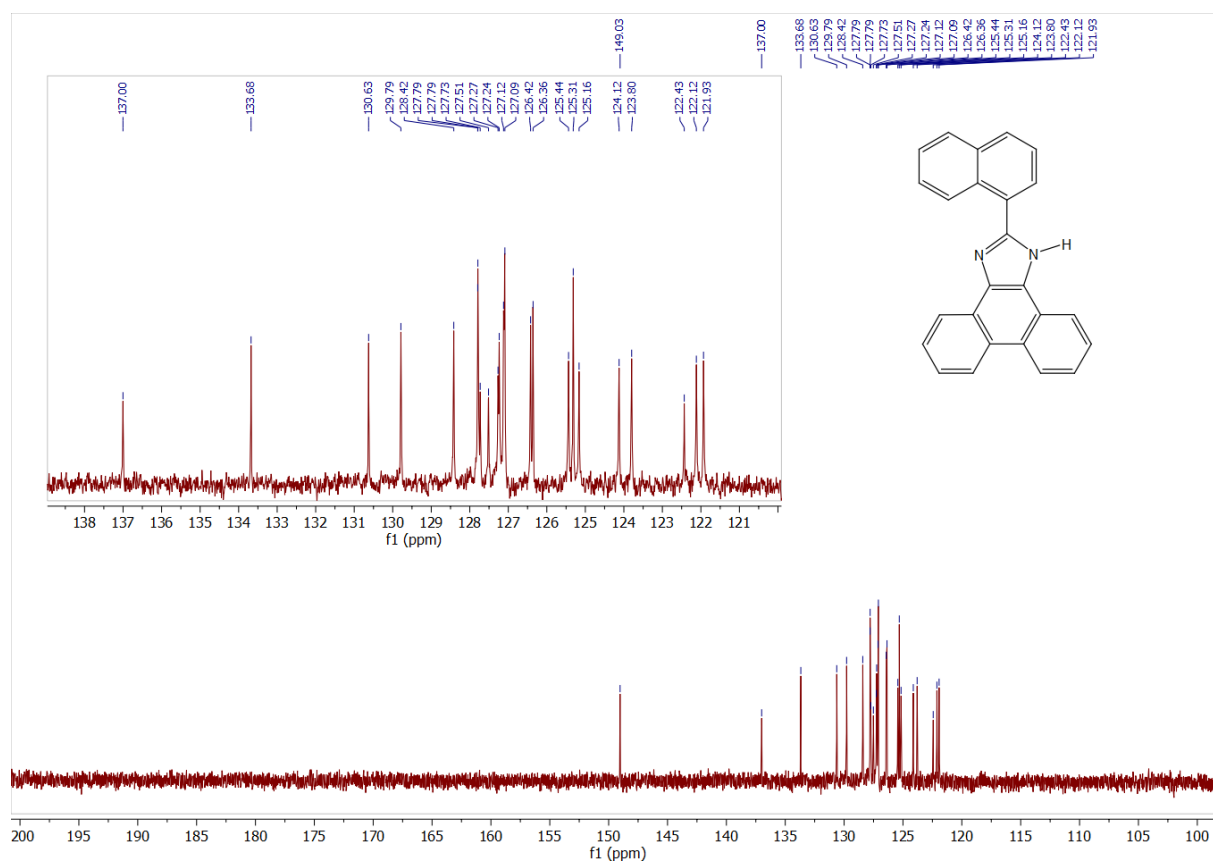

**<sup>13</sup>C NMR of 0C**

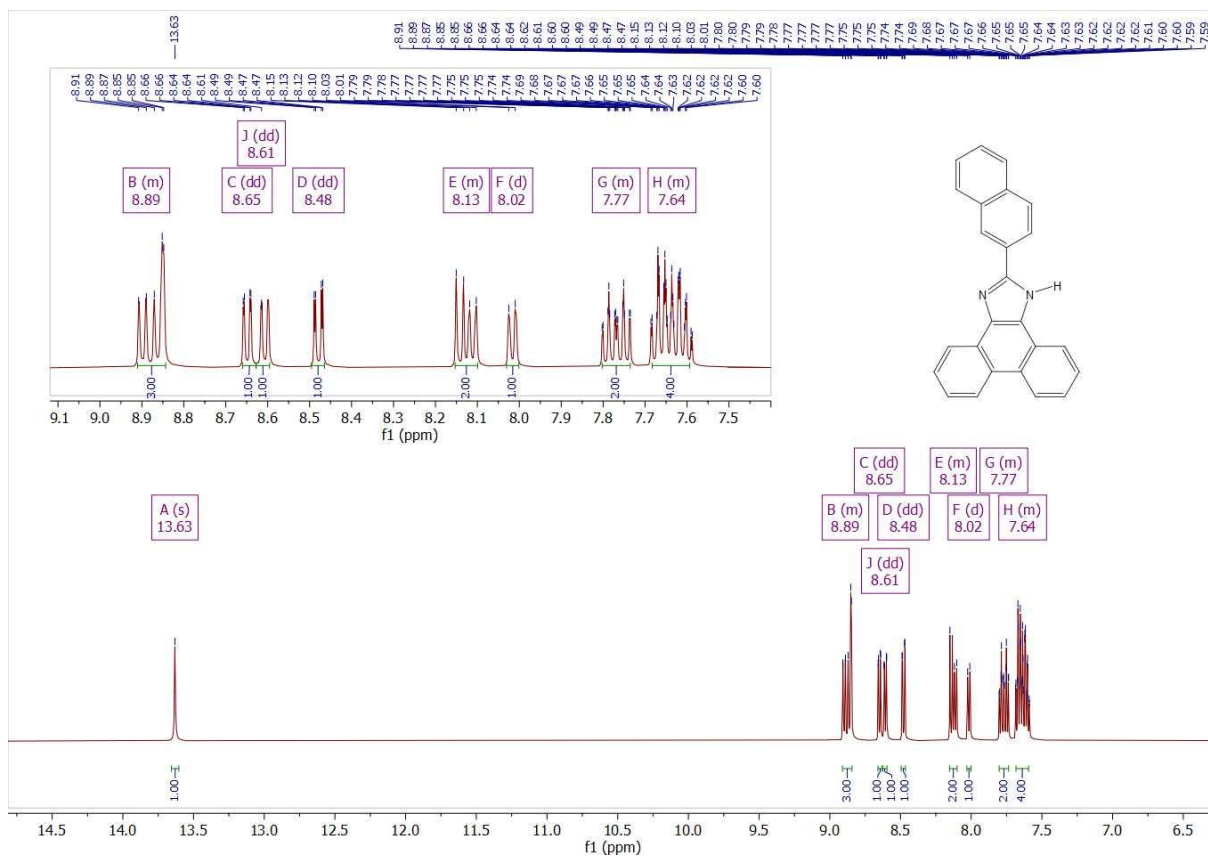

**<sup>1</sup>H NMR of 0D**

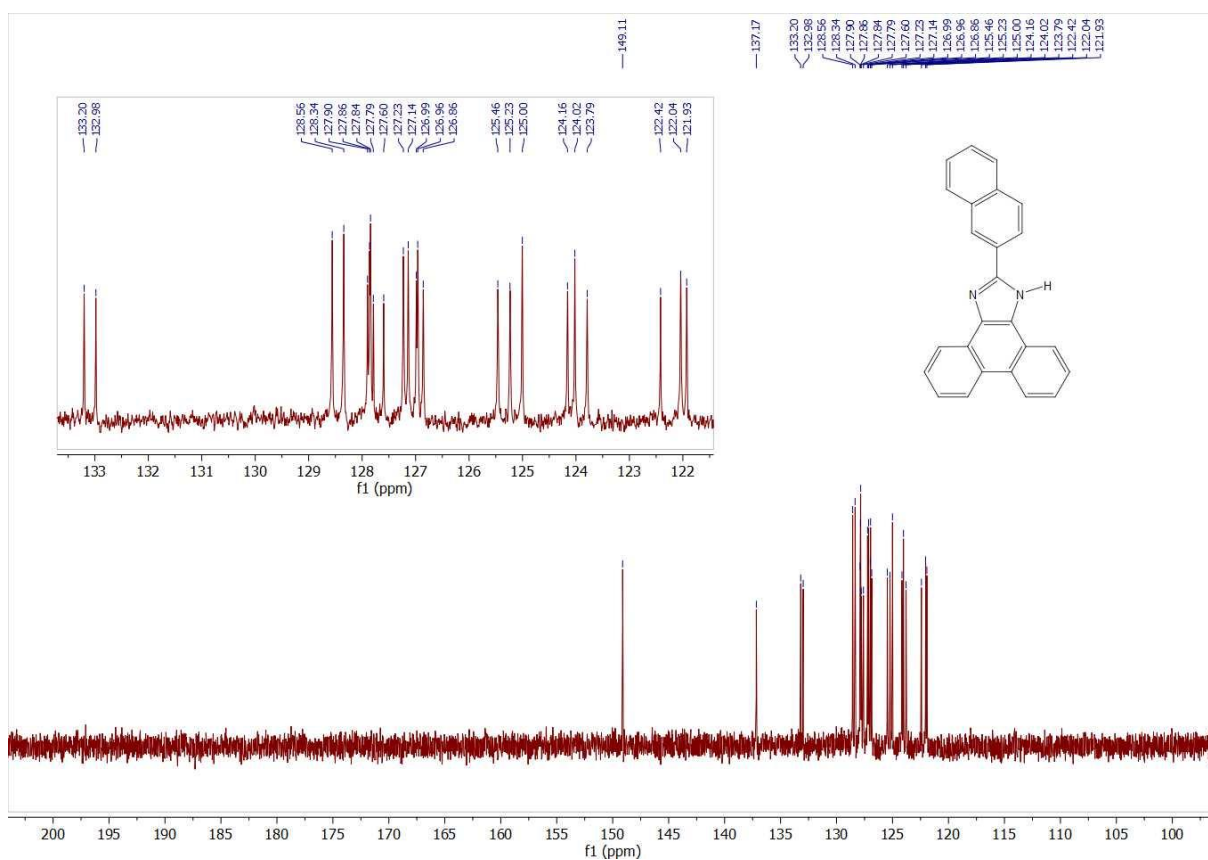

**<sup>13</sup>C NMR of 0D**



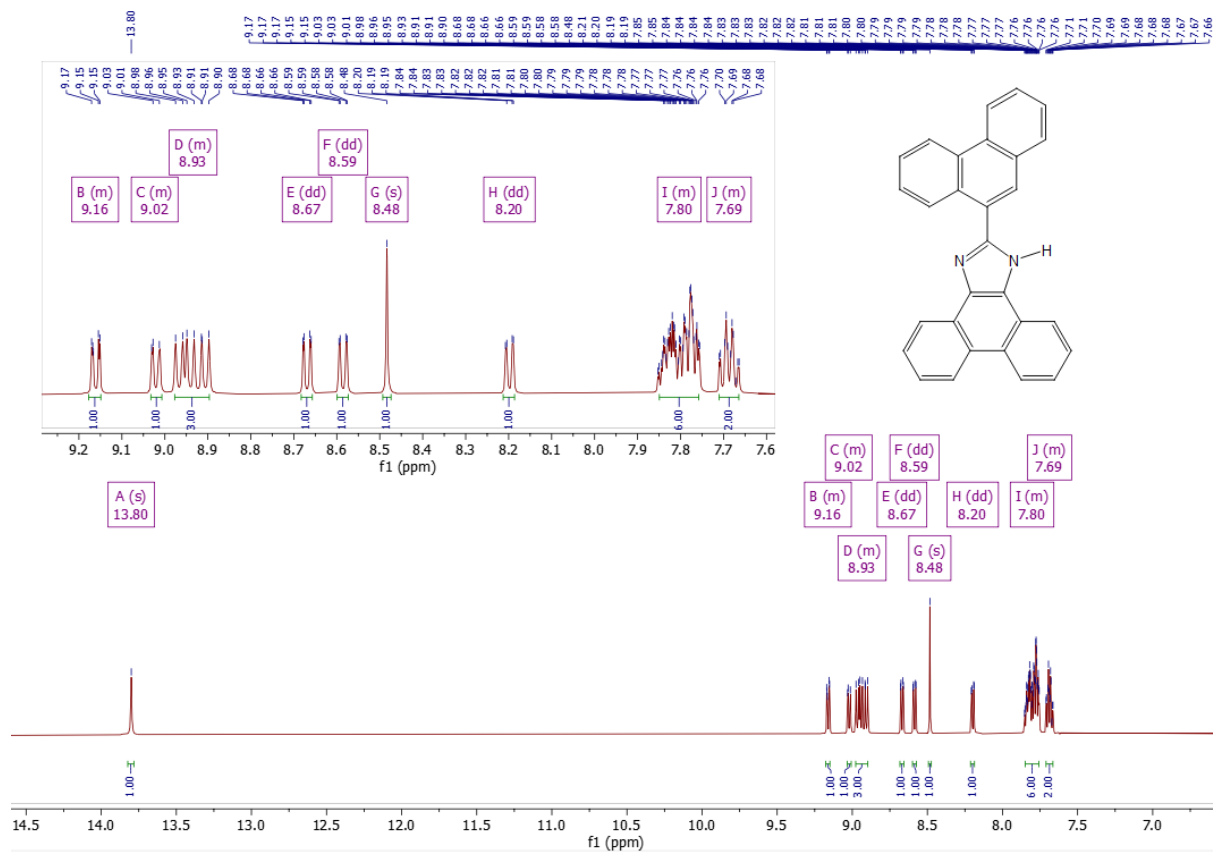

**<sup>1</sup>H NMR of 0F**

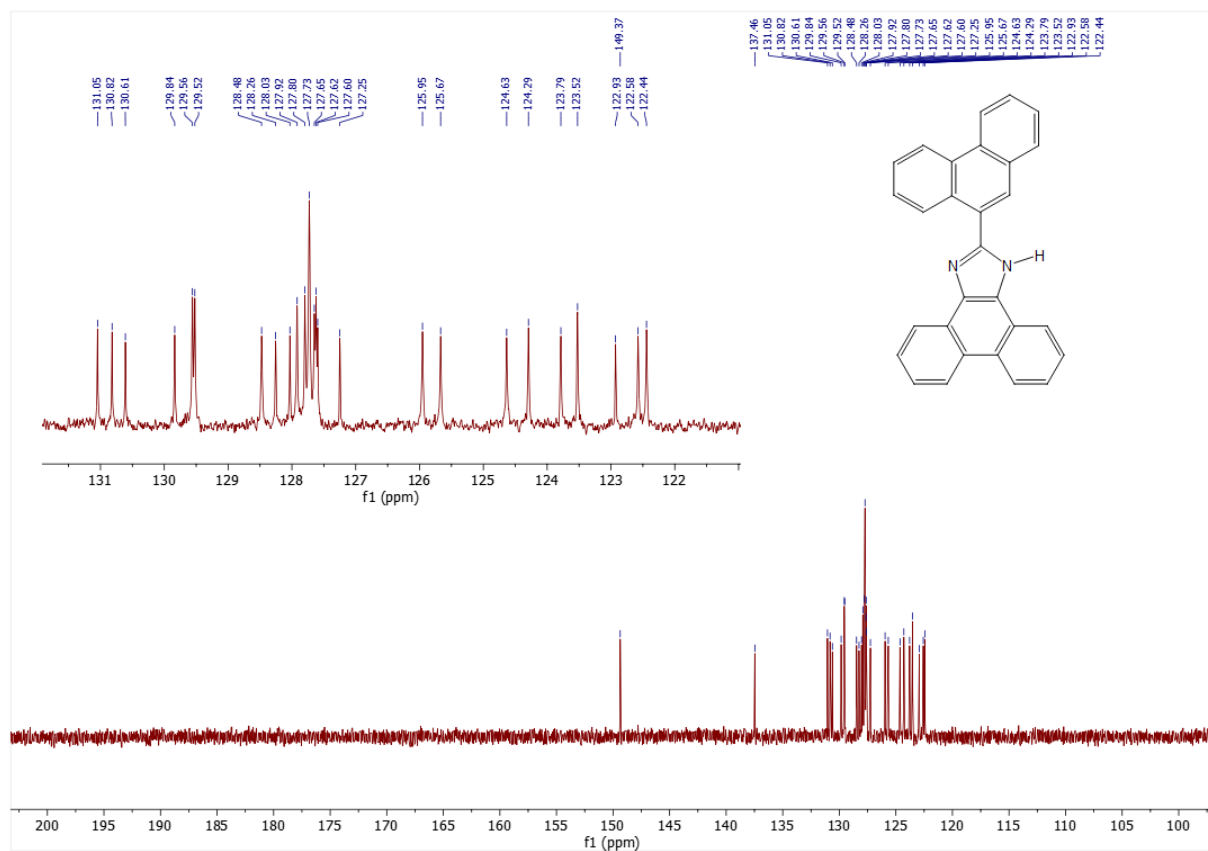

**<sup>13</sup>C NMR of 0F**



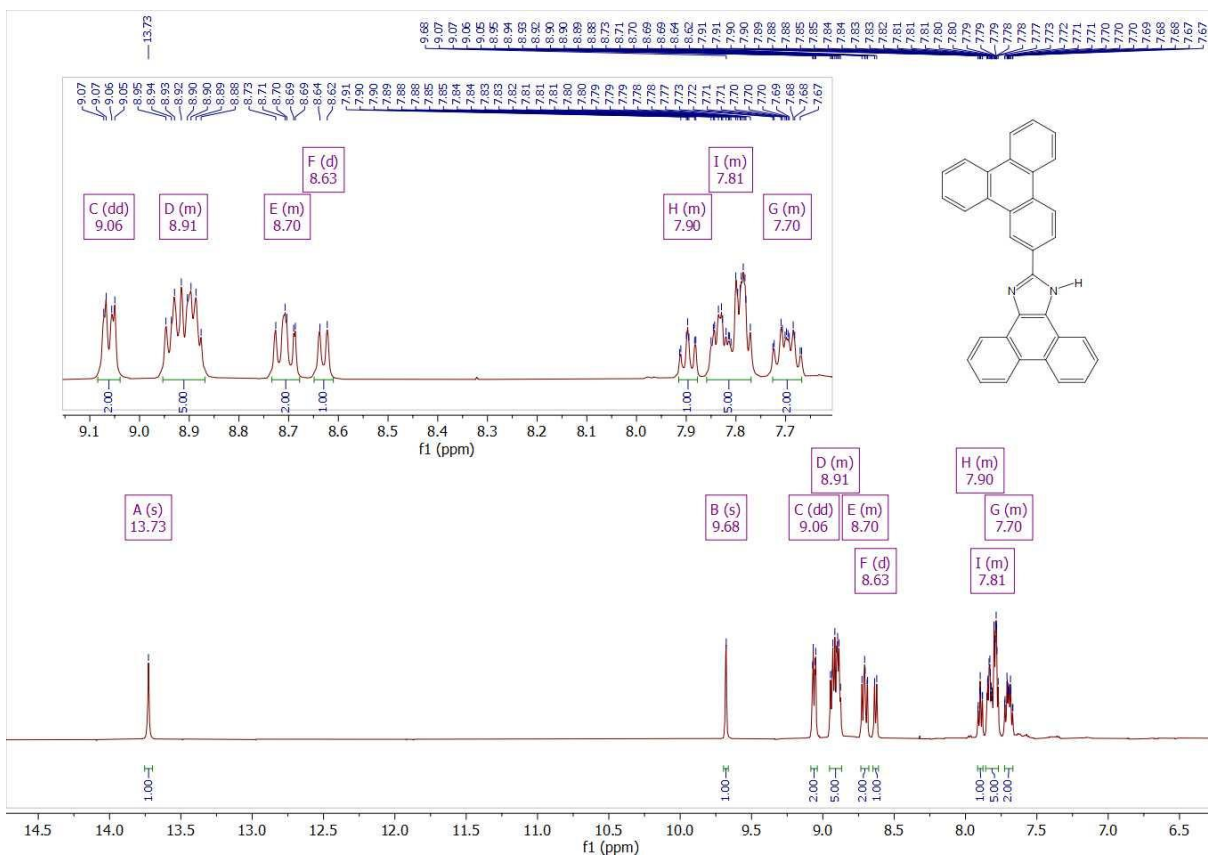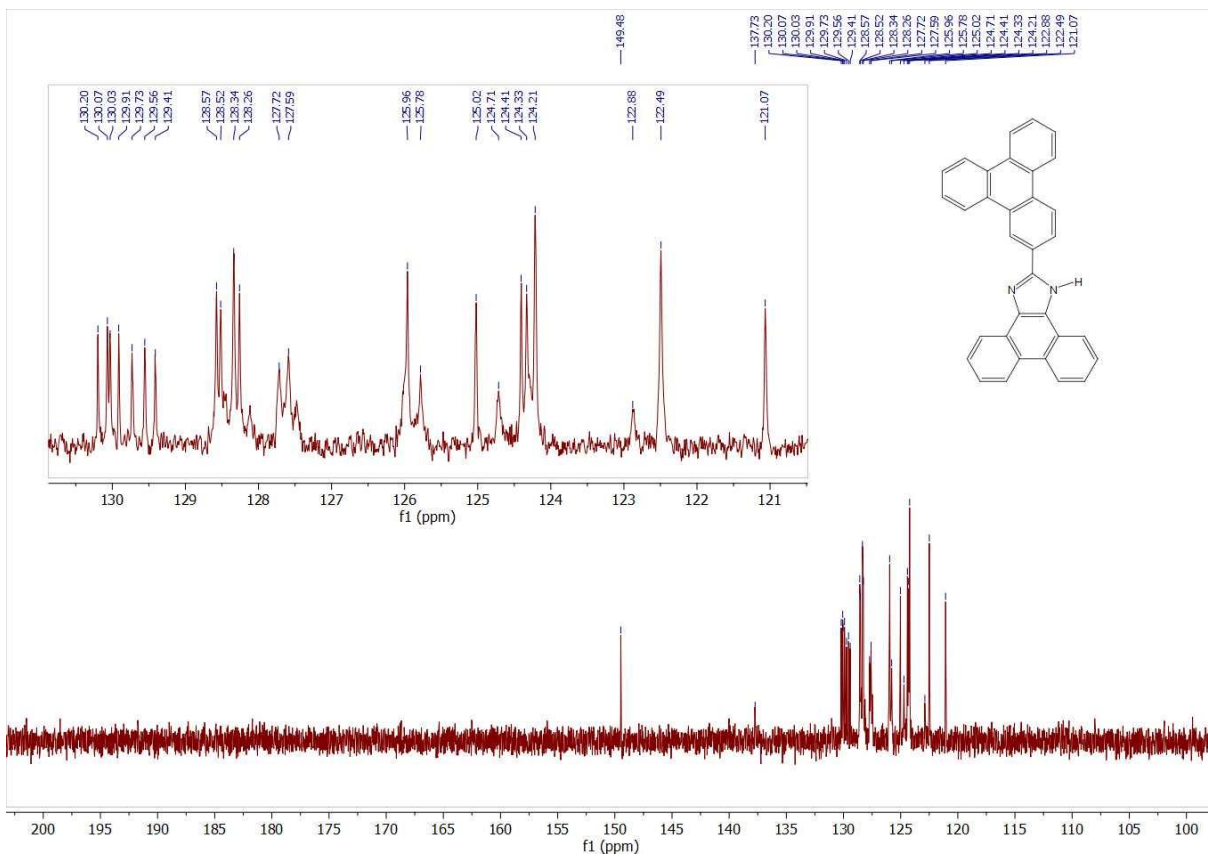



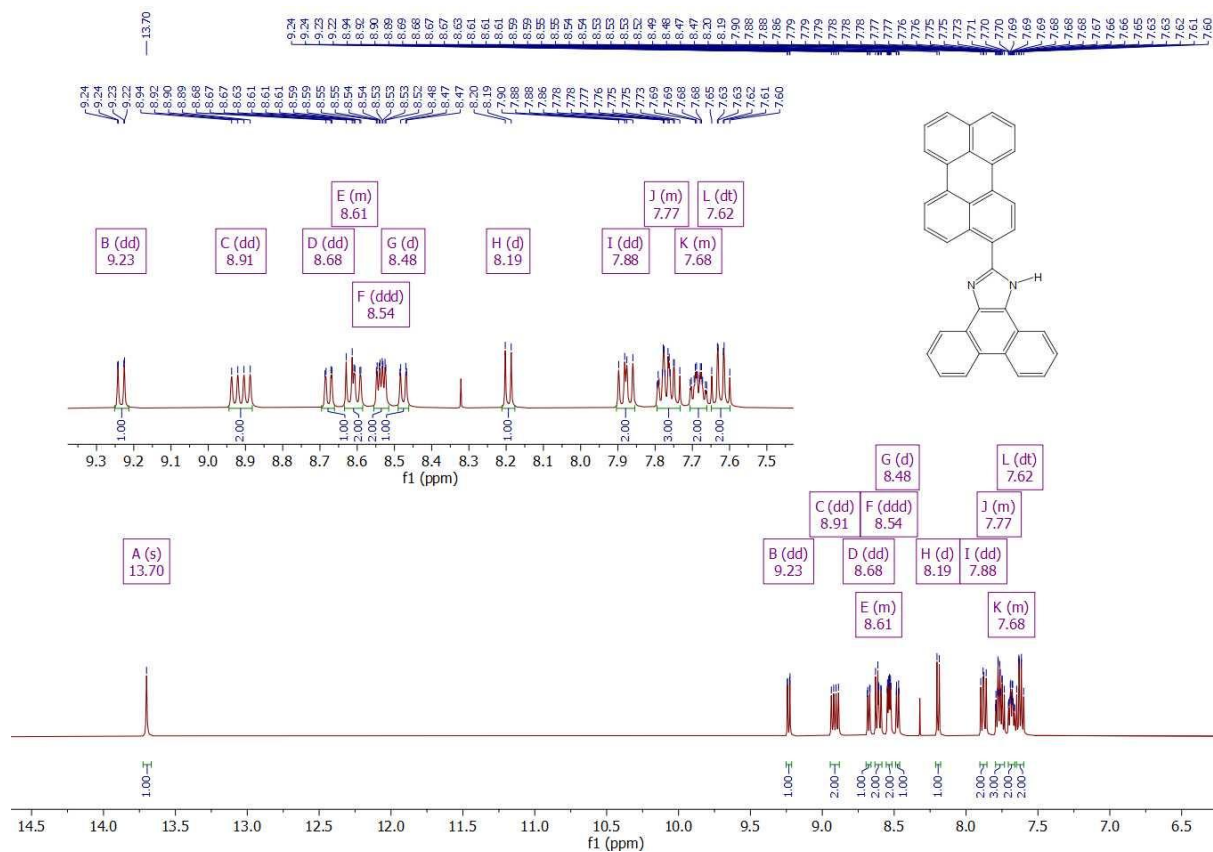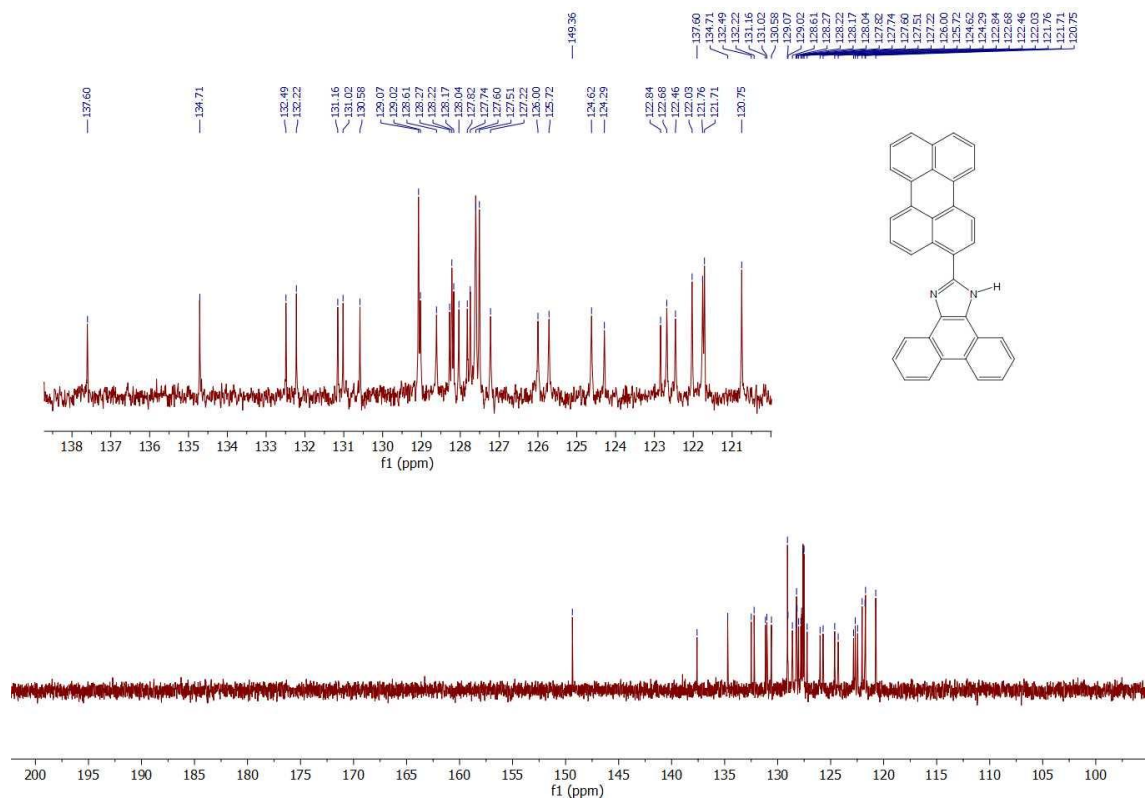

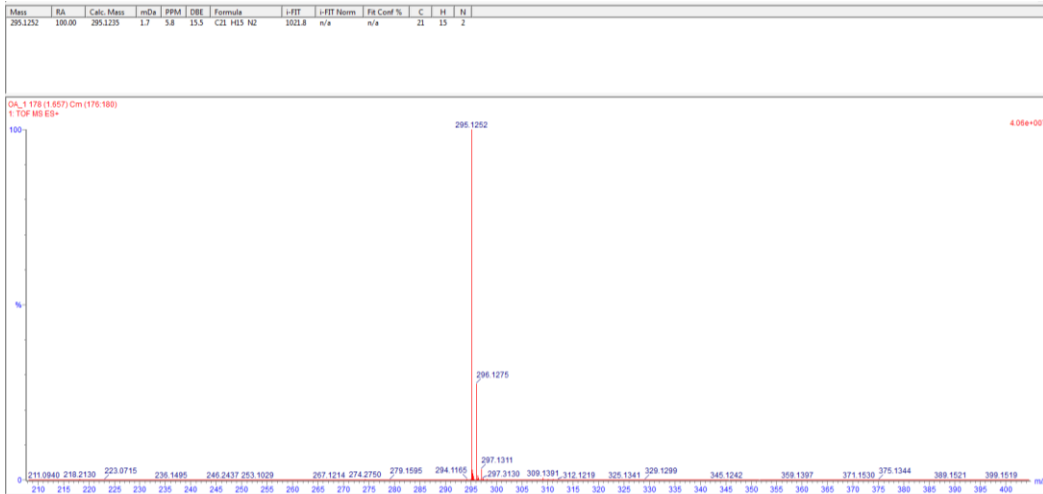

### HRMS of 0A

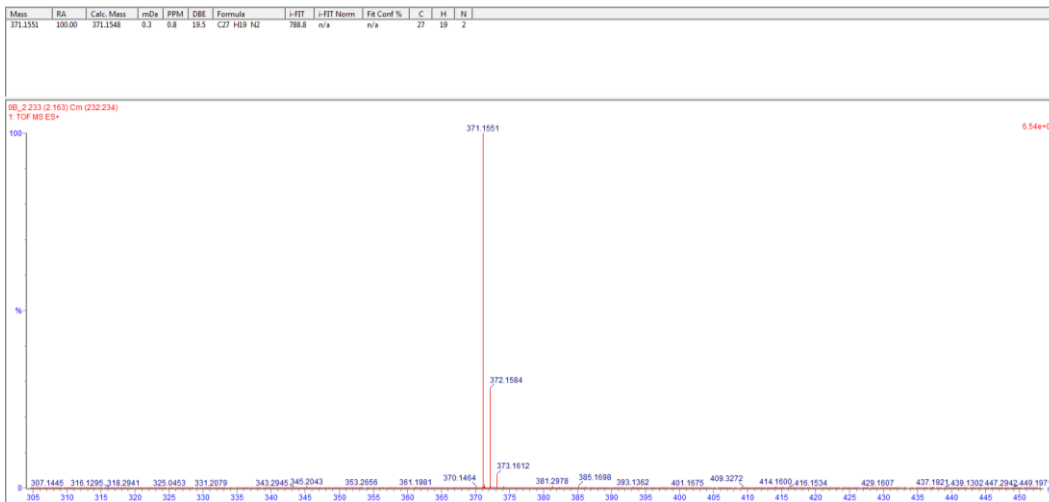

### HRMS of 0B

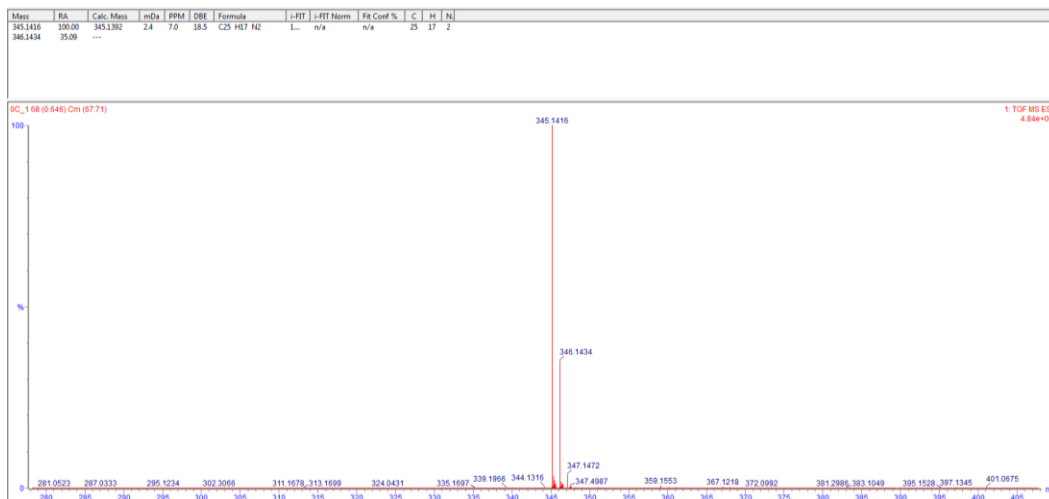

### HRMS of 0C

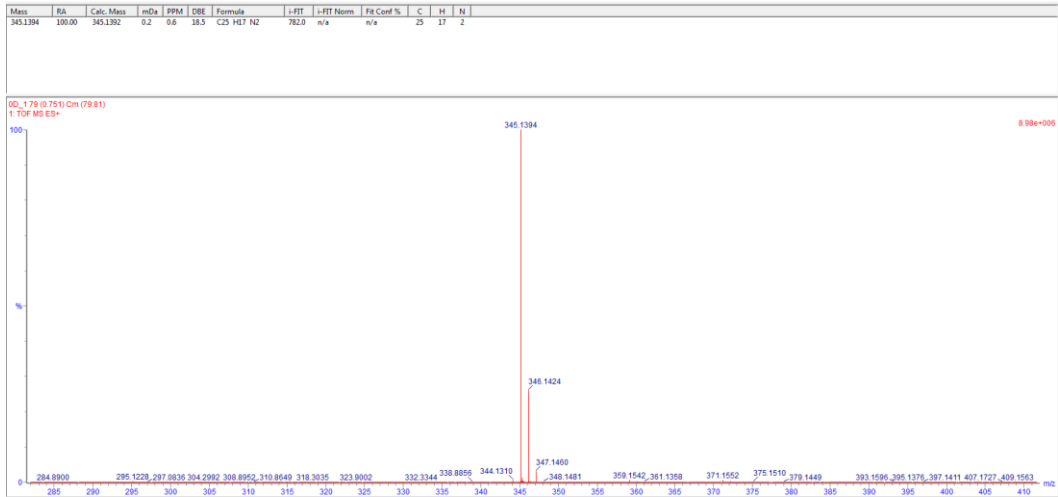

### HRMS of 0D

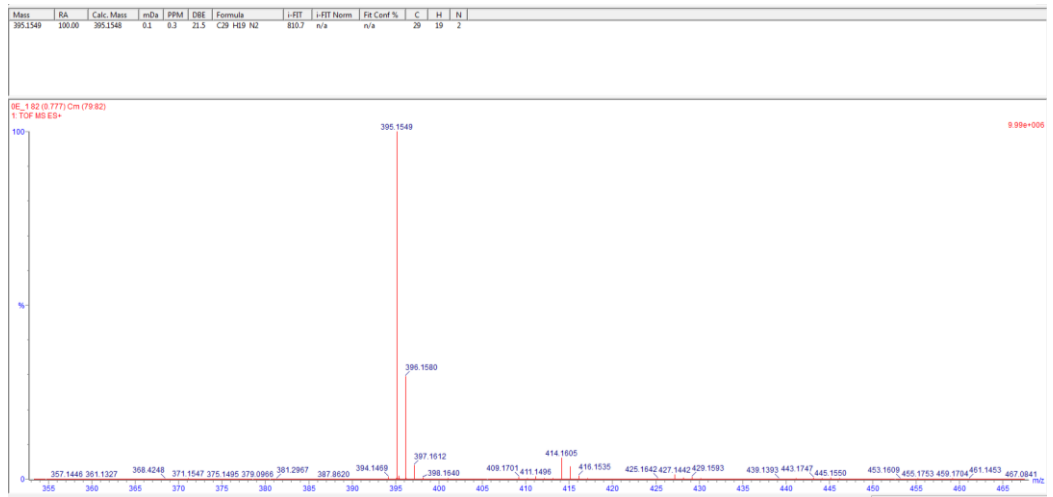

### HRMS of 0E

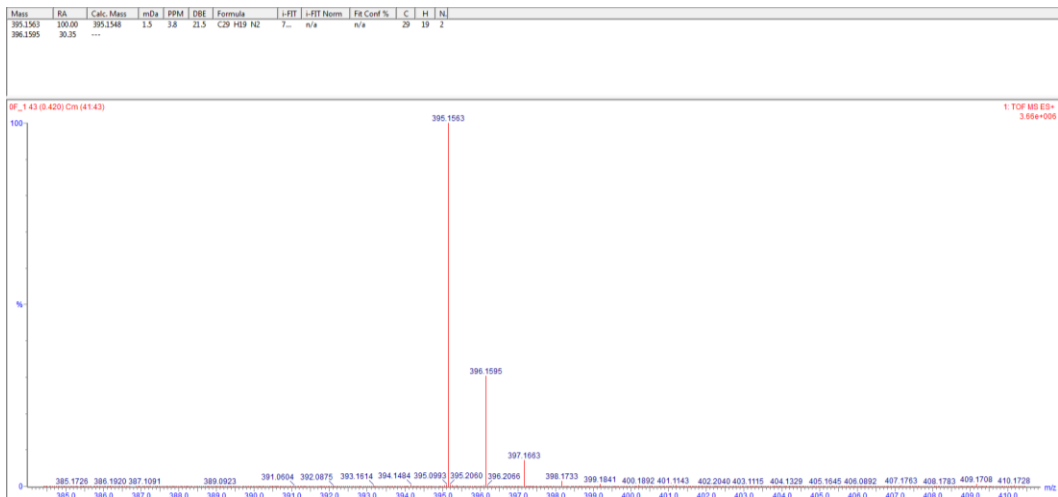

### HRMS of 0F

| Mass     | RA     | Calc. Mass | mDa | PPM | DBE  | Formula                                        | i-FTT | i-FTT Norm | Fit Coef % | C  | H  | N |
|----------|--------|------------|-----|-----|------|------------------------------------------------|-------|------------|------------|----|----|---|
| 395.1557 | 100.00 | 395.1548   | 0.9 | 2.3 | 21.5 | C <sub>29</sub> H <sub>49</sub> N <sub>2</sub> | 834.4 | n/a        | n/a        | 29 | 49 | 2 |

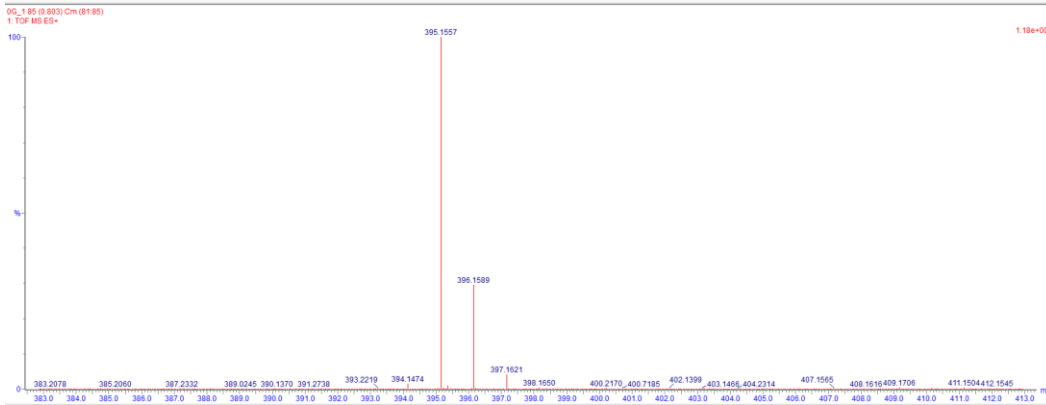

### HRMS of 0G

| Mass     | RA     | Calc. Mass | mDa | PPM | DBE  | Formula                                        | i-FTT | i-FTT Norm | Fit Coef % | C   | H   | N   |
|----------|--------|------------|-----|-----|------|------------------------------------------------|-------|------------|------------|-----|-----|-----|
| 445.1713 | 100.00 | 445.1705   | 0.8 | 1.8 | 24.5 | C <sub>33</sub> H <sub>41</sub> N <sub>2</sub> | 8...  | n/a        | n/a        | 33  | 41  | 2   |
| 446.1746 | 33.88  | ---        | --- | --- | ---  | ---                                            | ---   | ---        | ---        | --- | --- | --- |

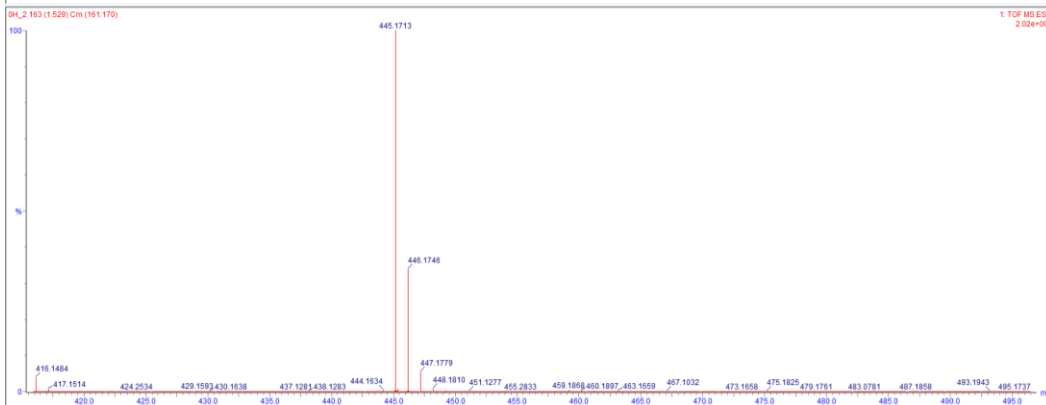

### HRMS of 0H

| Mass     | RA     | Calc. Mass | mDa | PPM | DBE  | Formula                                        | i-FTT | i-FTT Norm | Fit Coef % | C   | H   | N   |
|----------|--------|------------|-----|-----|------|------------------------------------------------|-------|------------|------------|-----|-----|-----|
| 419.1554 | 100.00 | 419.1548   | 0.6 | 1.4 | 23.5 | C <sub>31</sub> H <sub>43</sub> N <sub>2</sub> | 7...  | n/a        | n/a        | 31  | 43  | 2   |
| 420.1585 | 32.43  | ---        | --- | --- | ---  | ---                                            | ---   | ---        | ---        | --- | --- | --- |

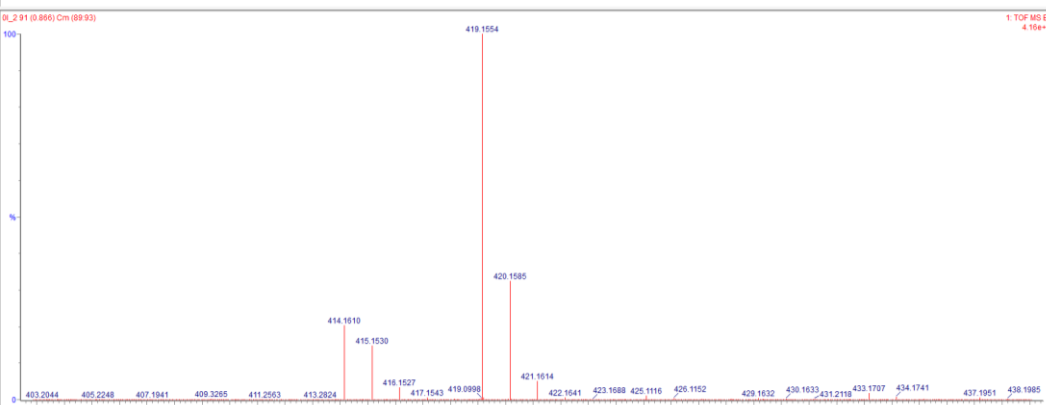

### HRMS of 0I

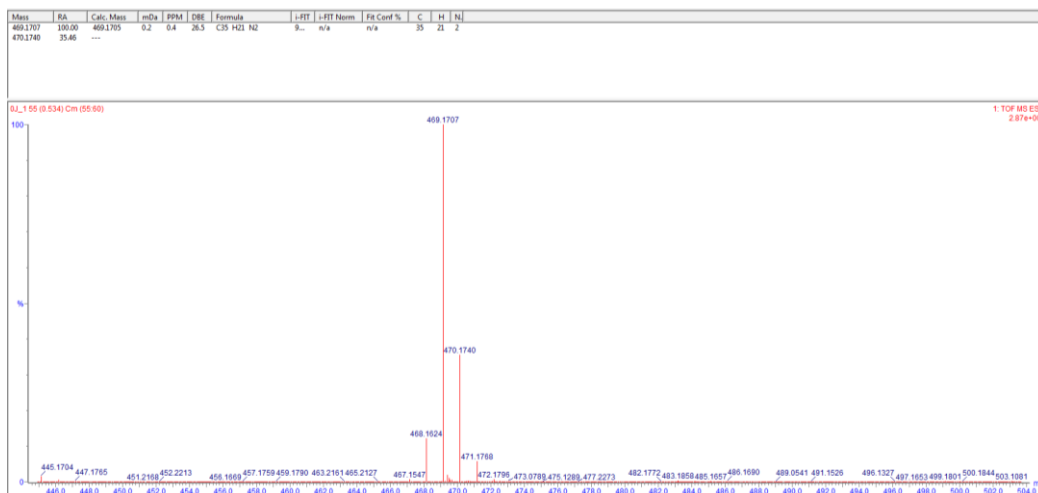

## HRMS of 0J

## 5. Thermal properties

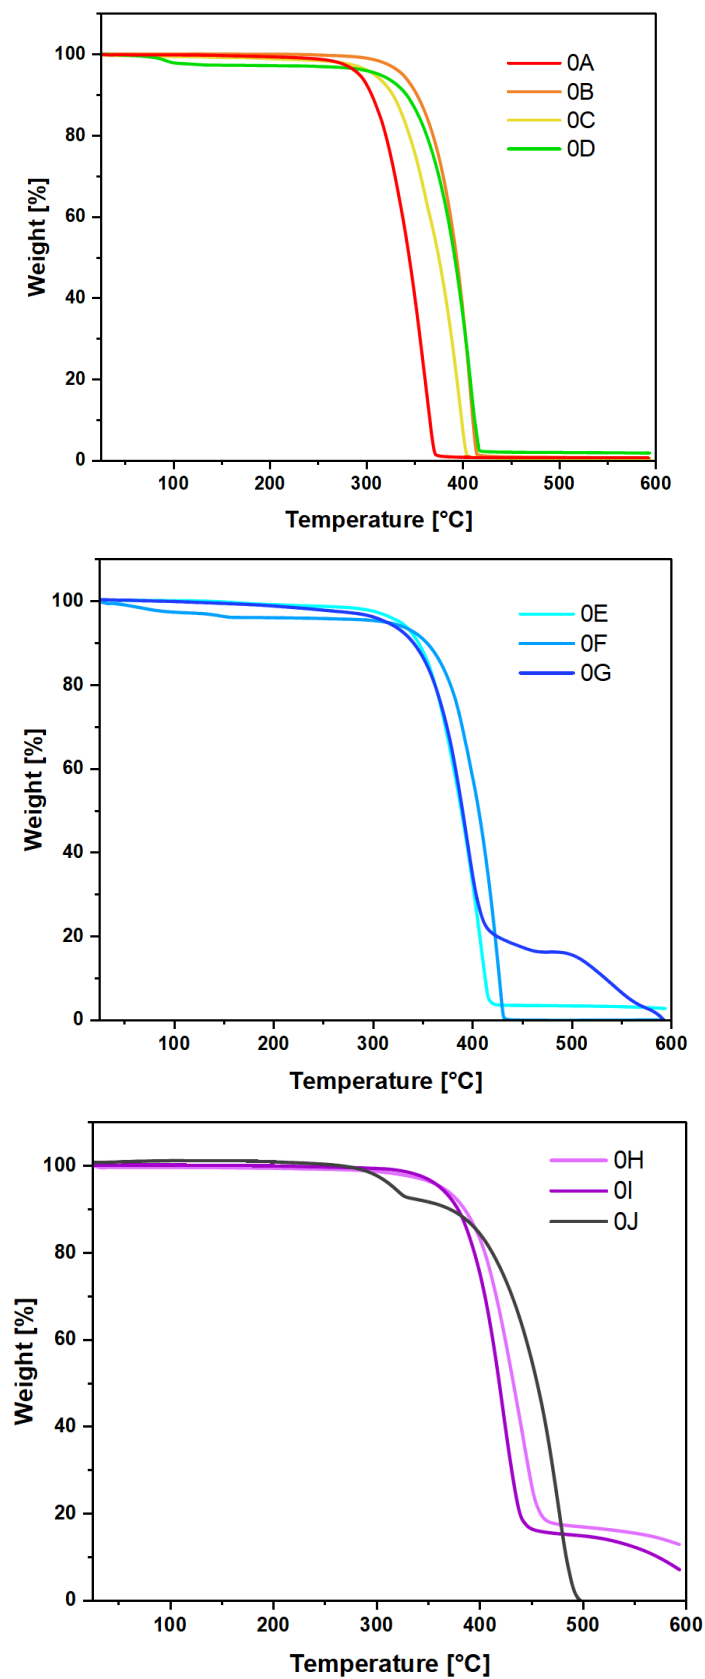

Figure S1. TGA thermograms – thermal properties of 0A–0J series.

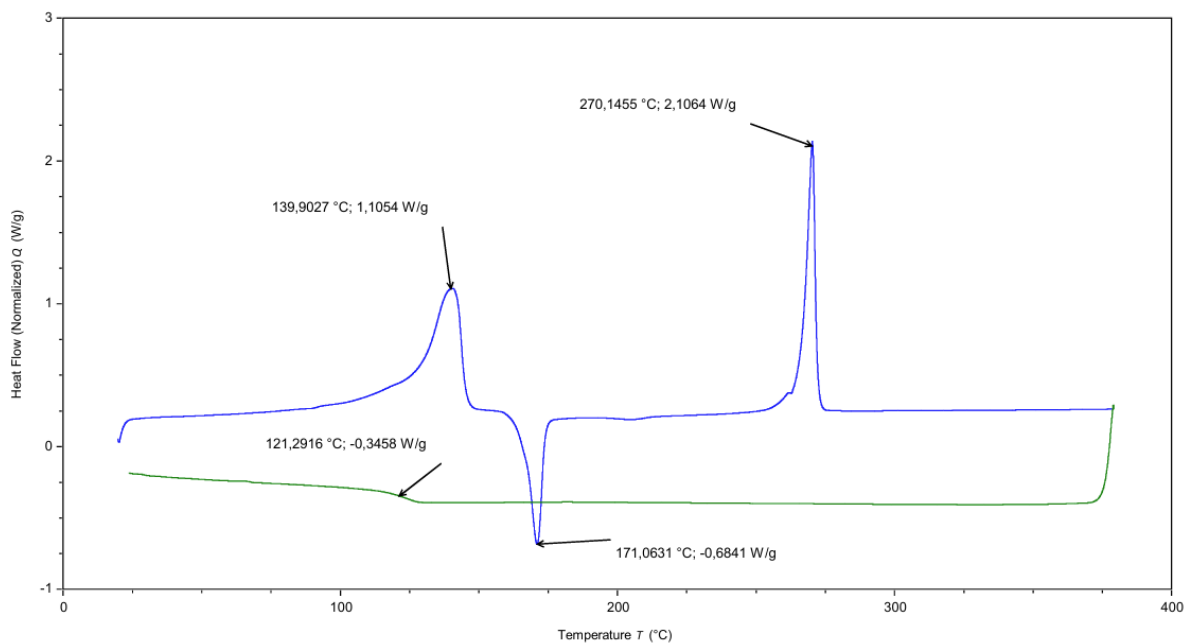

**Figure S2.** DSC thermograms of **0B**.

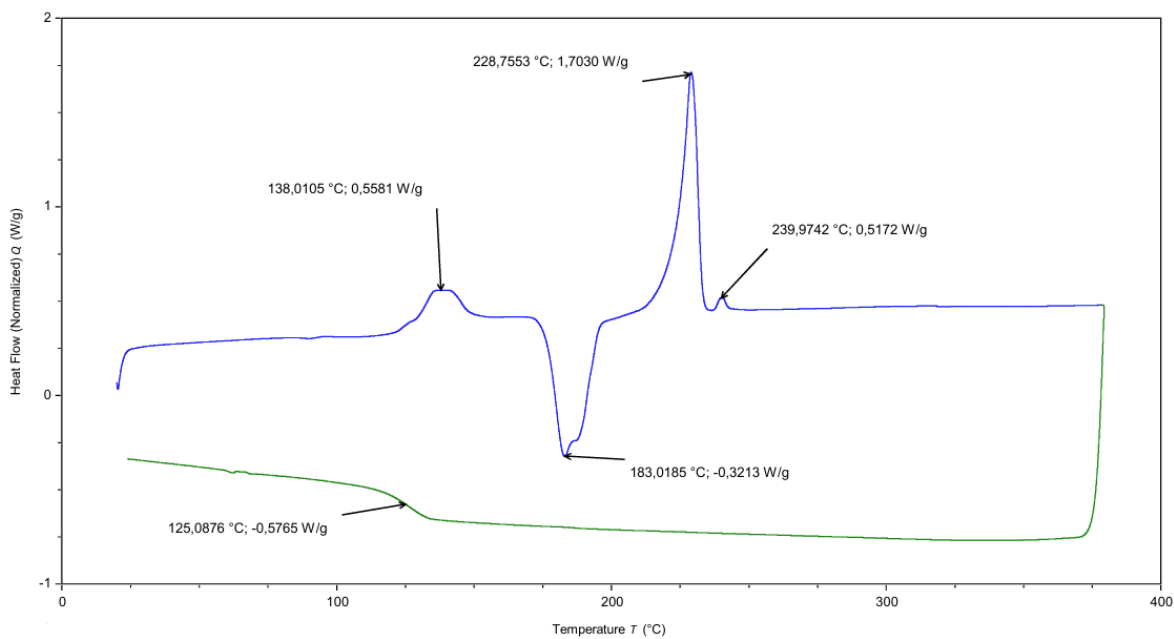

**Figure S3.** DSC thermograms of **0C**.

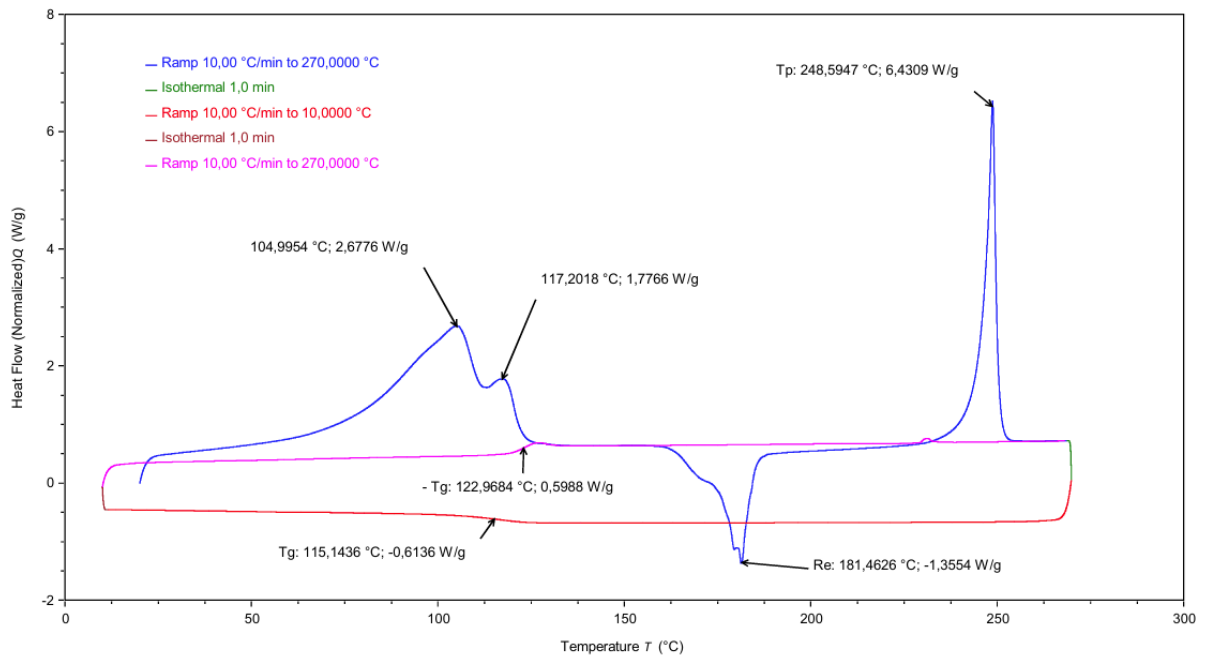

**Figure S4.** DSC thermograms of **0D**.

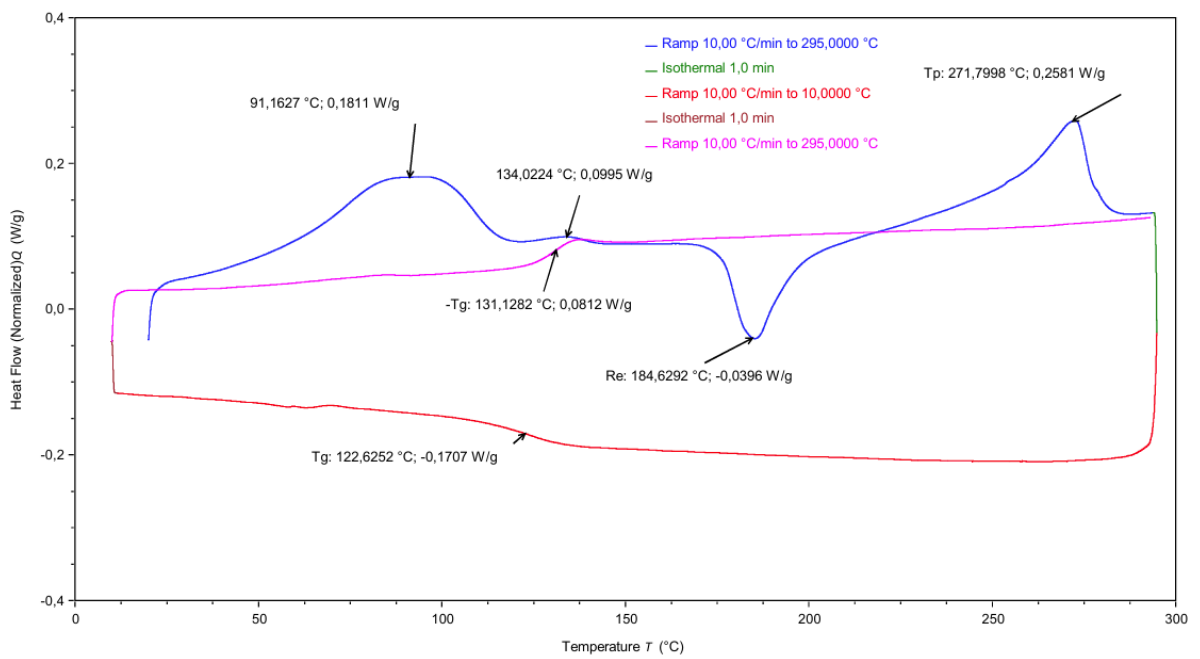

**Figure S5.** DSC thermograms of **0G**.

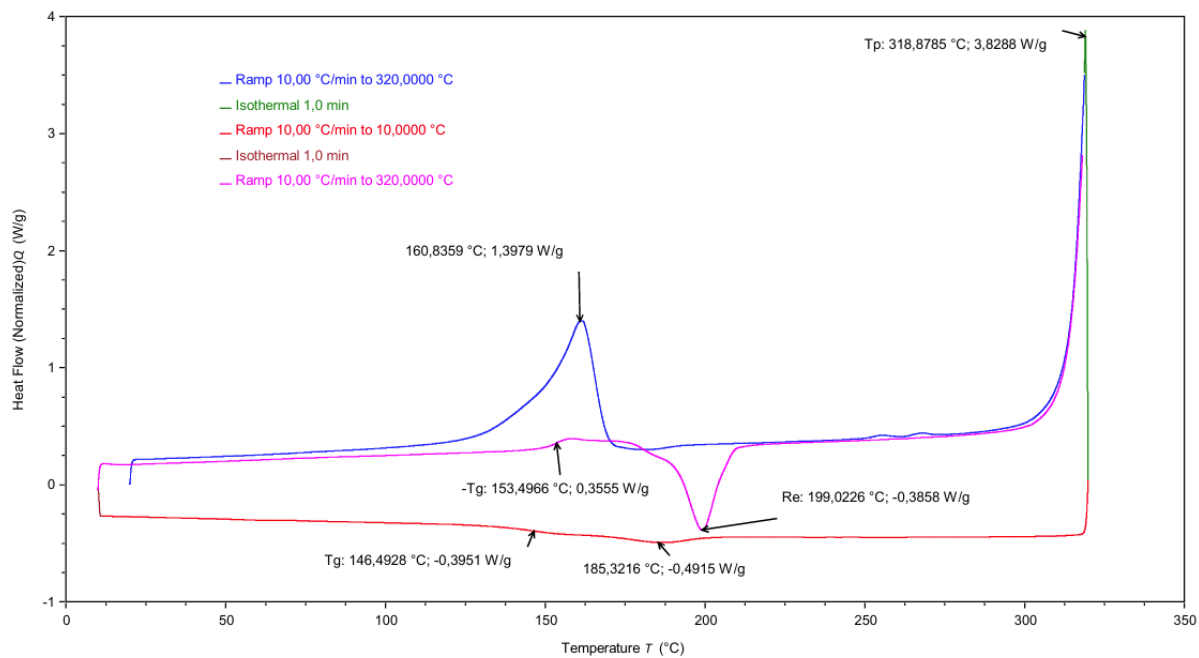

**Figure S6.** DSC thermograms of **0I**.

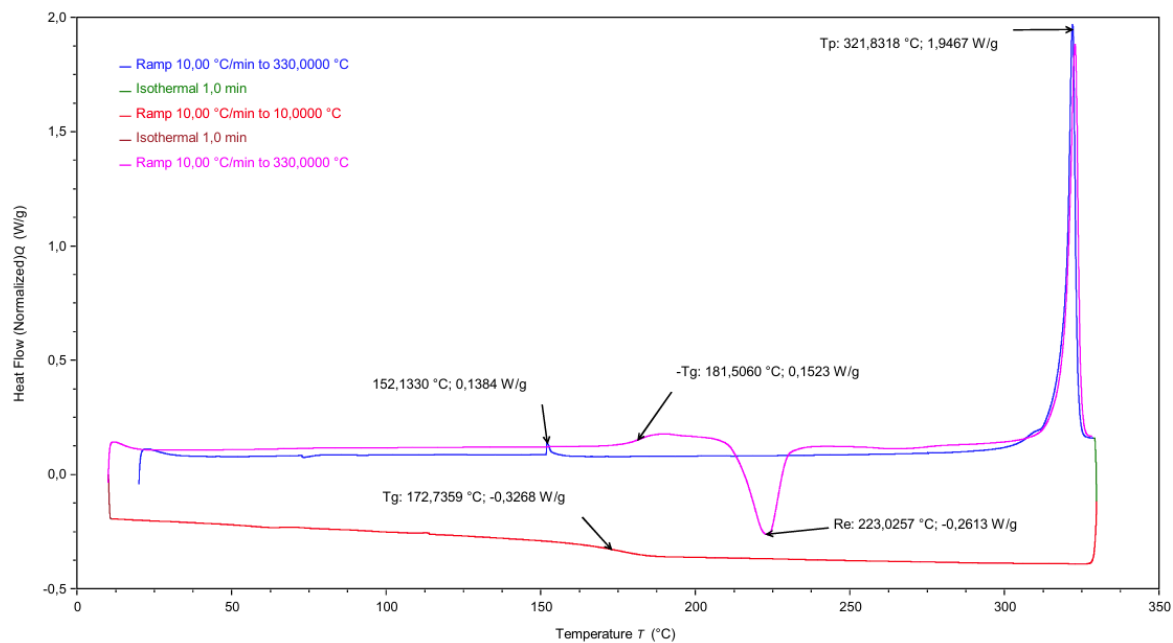

**Figure S7.** DSC thermograms of **0J**.

## 6. Electrochemical properties

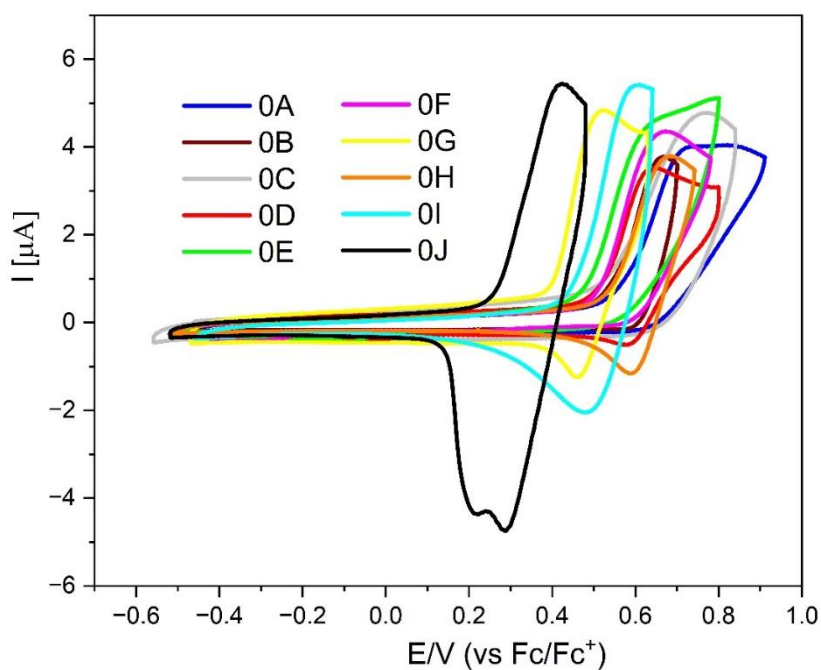

**Figure S8.** Cyclic voltammograms of the investigated compounds with sweep rate  $\nu = 100$  mV/s, 0.1 M  $Bu_4NPF_6$  in  $CH_2Cl_2$  during positive potential sweeping ( $c = 1 \times 10^{-3}$  mol/L).

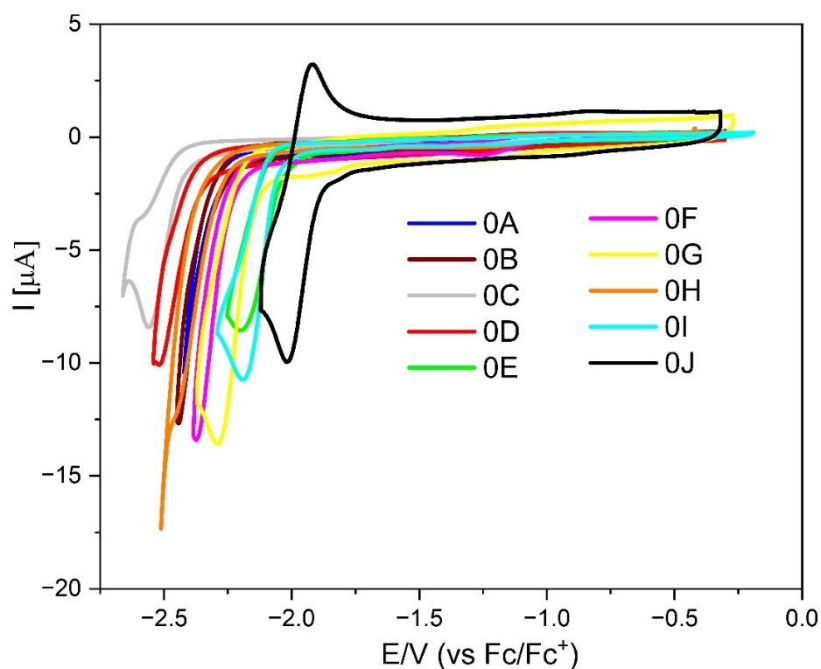

**Figure S9.** Cyclic voltammograms of the investigated compounds with sweep rate  $\nu = 100$  mV/s, 0.1 M  $Bu_4NPF_6$  in  $CH_2Cl_2$  during negative potential sweeping ( $c = 1 \times 10^{-3}$  mol/L).

## 7. DFT calculations

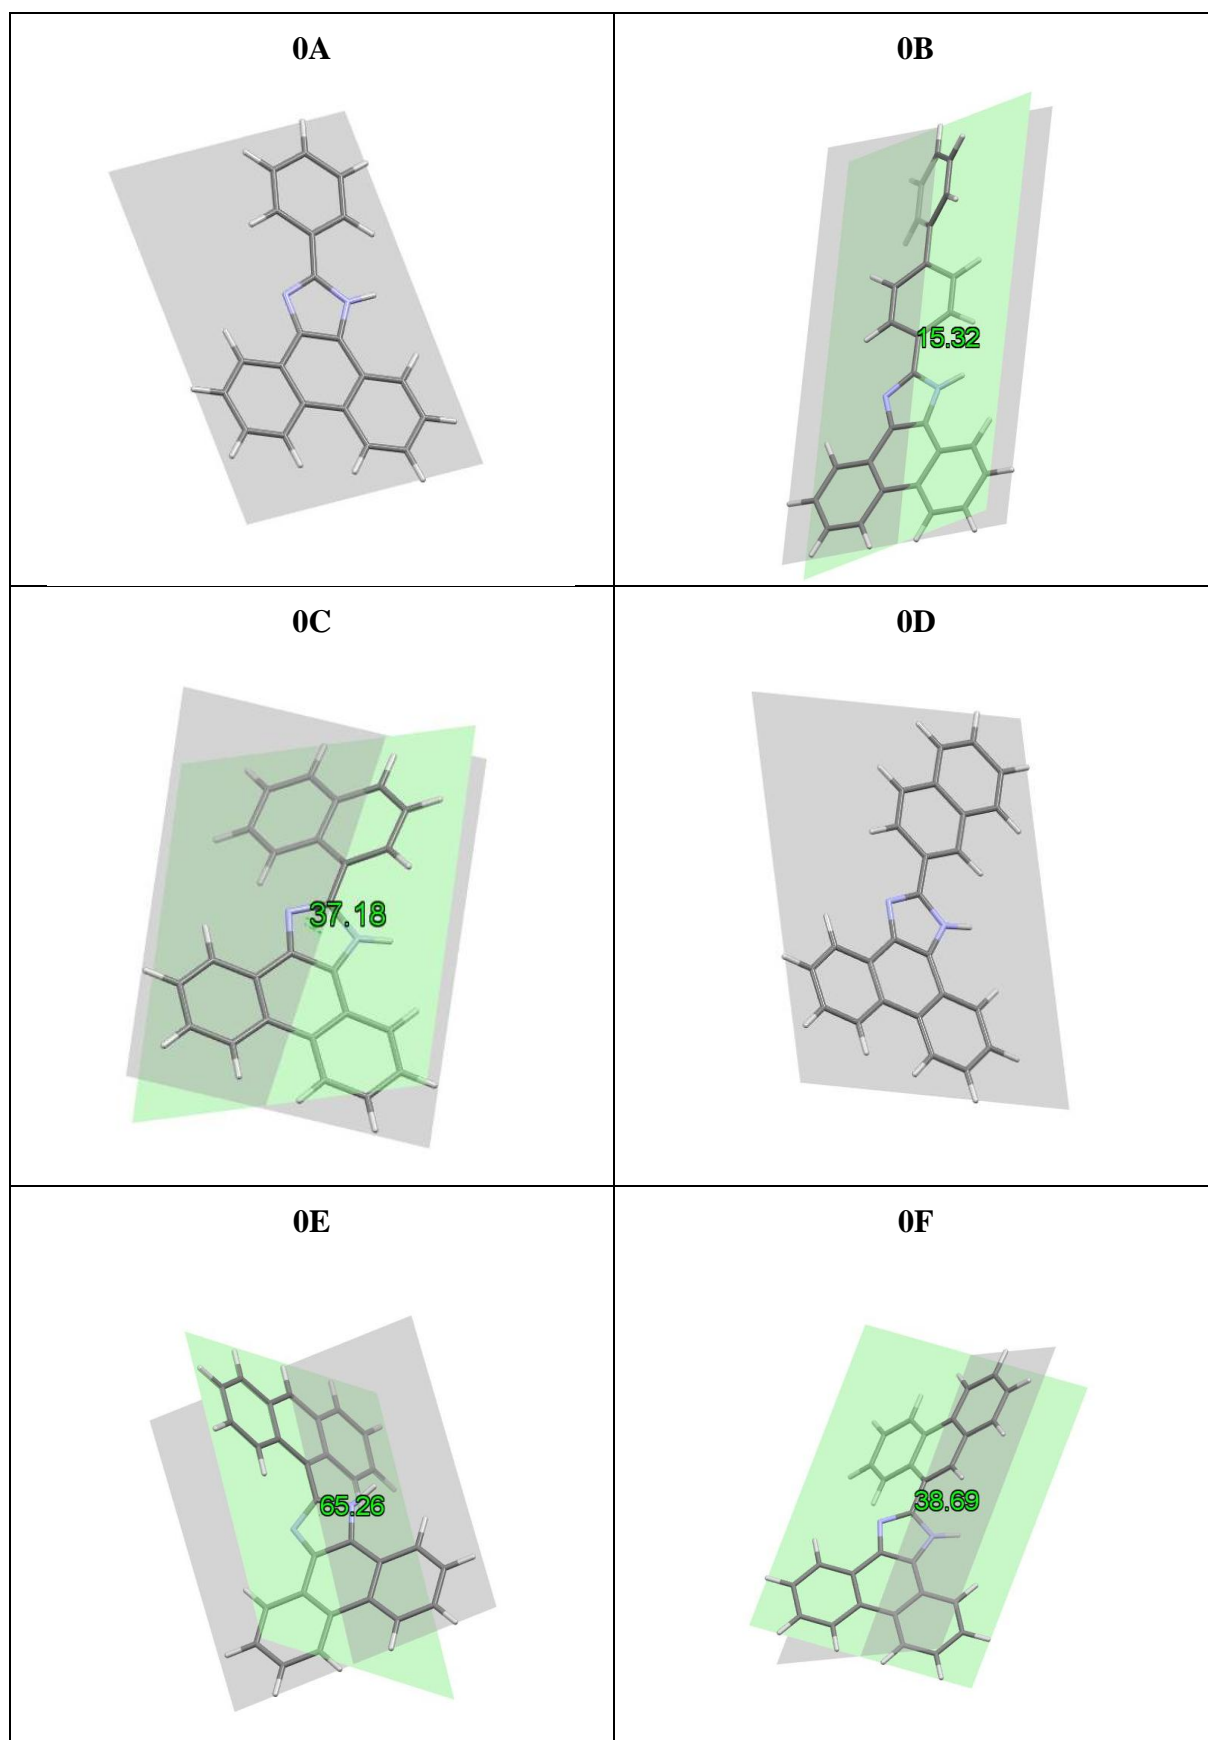

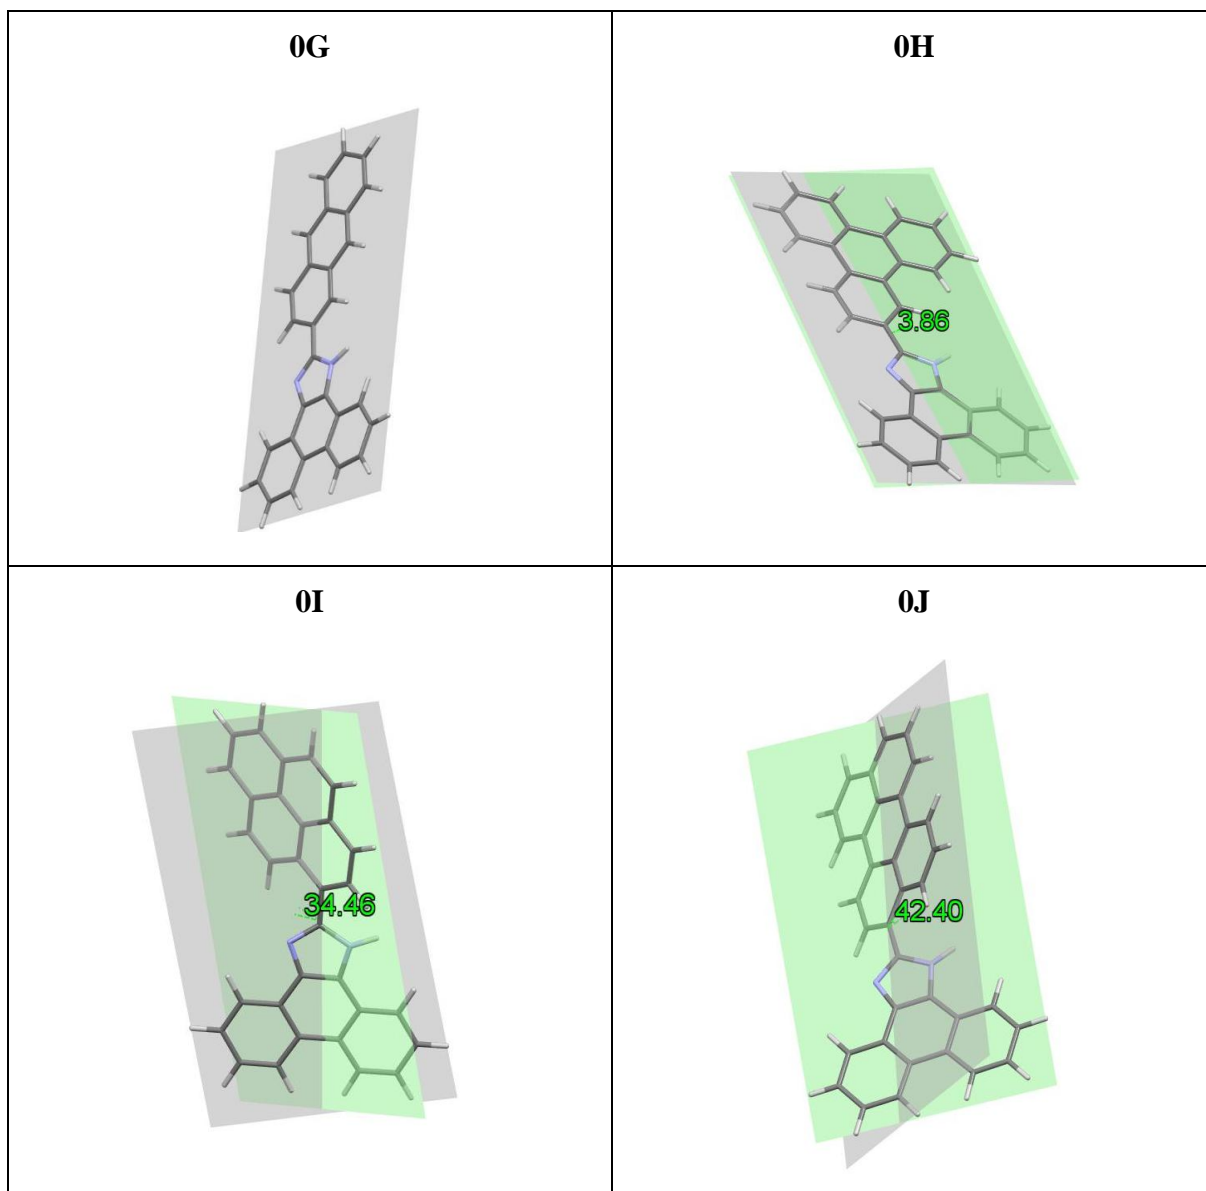

**Figure S10.** Dihedral angle between the plane of the aromatic group and the central core of 1H-phenanthro[9,10-d]imidazole for derivatives **0A–0J**.

**Table S1.** Calculated ionization potentials and electron affinities (vertical and adiabatic), energy gap, hole and electron reorganization energies and extraction potentials.

| Compound  | IP <sub>v</sub><br>[eV] | IP <sub>a</sub><br>[eV] | EA <sub>v</sub><br>[eV] | EA <sub>a</sub><br>[eV] | λ <sub>electron</sub><br>[eV] | λ <sub>hole</sub><br>[eV] | λ <sub>hole</sub> -<br>λ <sub>electron</sub><br>[eV] | HEP<br>[eV] | EEP<br>[eV] |
|-----------|-------------------------|-------------------------|-------------------------|-------------------------|-------------------------------|---------------------------|------------------------------------------------------|-------------|-------------|
| <b>0A</b> | 5.72                    | 5.61                    | 1.60                    | 1.76                    | 0.31                          | 0.21                      | 0.10                                                 | 5.51        | 1.92        |
| <b>0B</b> | 5.66                    | 5.55                    | 1.82                    | 2.02                    | 0.38                          | 0.22                      | 0.16                                                 | 5.45        | 2.20        |
| <b>0C</b> | 5.71                    | 5.58                    | 1.84                    | 2.07                    | 0.42                          | 0.26                      | 0.16                                                 | 5.45        | 2.26        |
| <b>0D</b> | 5.57                    | 5.57                    | 1.89                    | 2.03                    | 0.27                          | 0.10                      | 0.17                                                 | 5.47        | 2.16        |
| <b>0E</b> | 5.67                    | 5.48                    | 2.29                    | 2.43                    | 0.29                          | 0.19                      | 0.10                                                 | 5.48        | 2.58        |
| <b>0F</b> | 5.72                    | 5.59                    | 1.88                    | 2.12                    | 0.44                          | 0.13                      | 0.31                                                 | 5.59        | 2.32        |
| <b>0G</b> | 5.54                    | 5.46                    | 2.33                    | 2.43                    | 0.20                          | 0.17                      | 0.03                                                 | 5.38        | 2.53        |
| <b>0H</b> | 5.67                    | 5.56                    | 1.93                    | 2.07                    | 0.27                          | 0.24                      | 0.03                                                 | 5.43        | 2.20        |
| <b>0I</b> | 5.54                    | 5.42                    | 2.21                    | 2.36                    | 0.30                          | 0.24                      | 0.06                                                 | 5.31        | 2.50        |
| <b>0J</b> | 5.36                    | 5.25                    | 2.57                    | 2.69                    | 0.23                          | 0.22                      | 0.01                                                 | 5.14        | 2.80        |

EEP = E<sup>0</sup>(M<sup>-</sup>) - E<sup>-</sup>(M<sup>-</sup>); HEP = E<sup>+</sup>(M<sup>+</sup>) - E<sup>0</sup>(M<sup>+</sup>); λ<sub>electron</sub> = EEP - EA<sub>v</sub>; λ<sub>hole</sub> = IP<sub>v</sub> - HEP

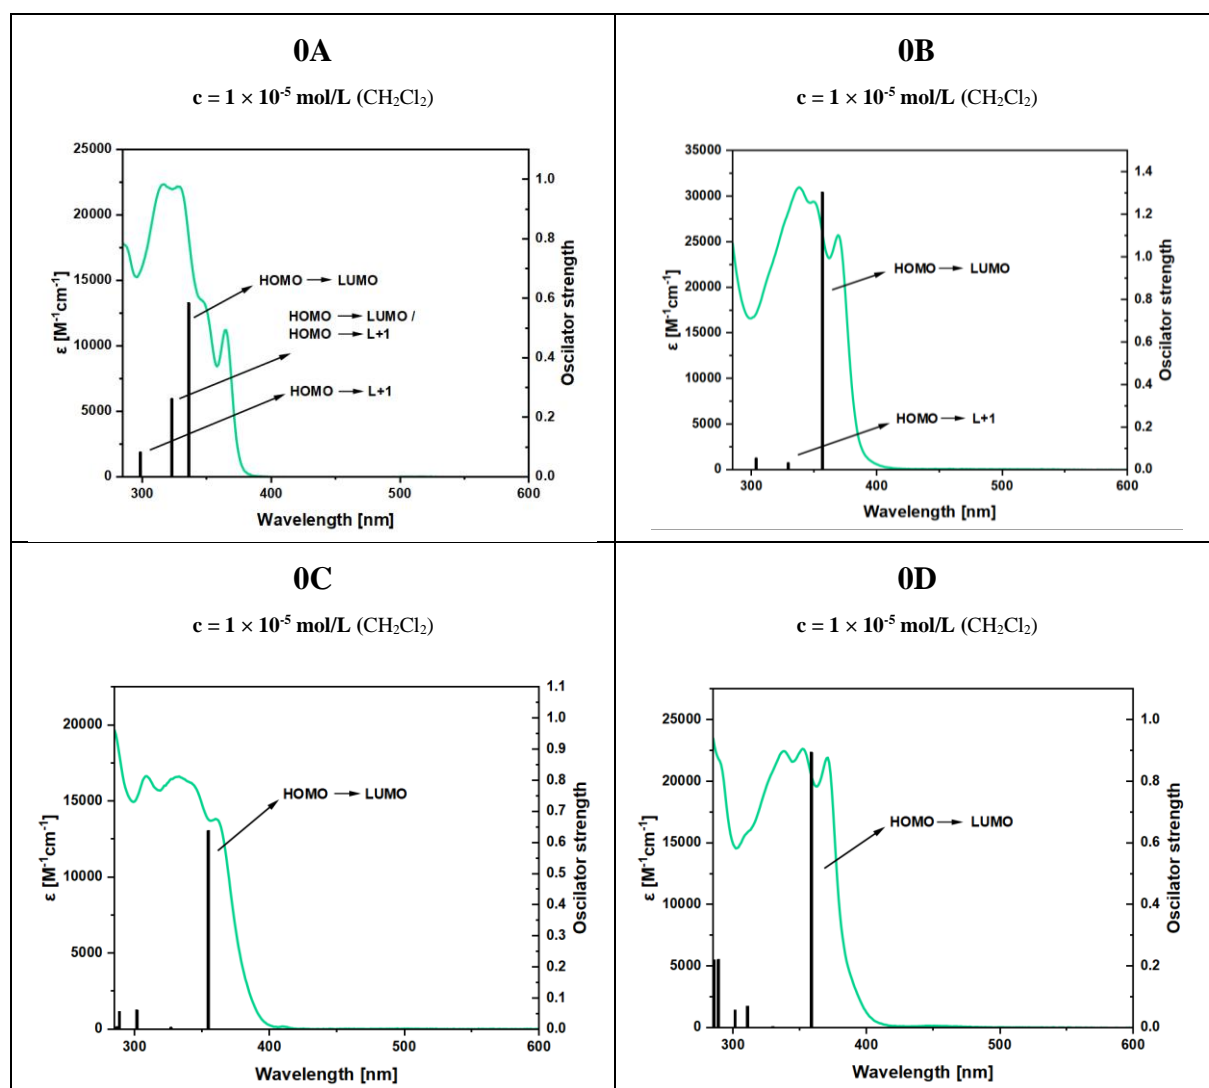

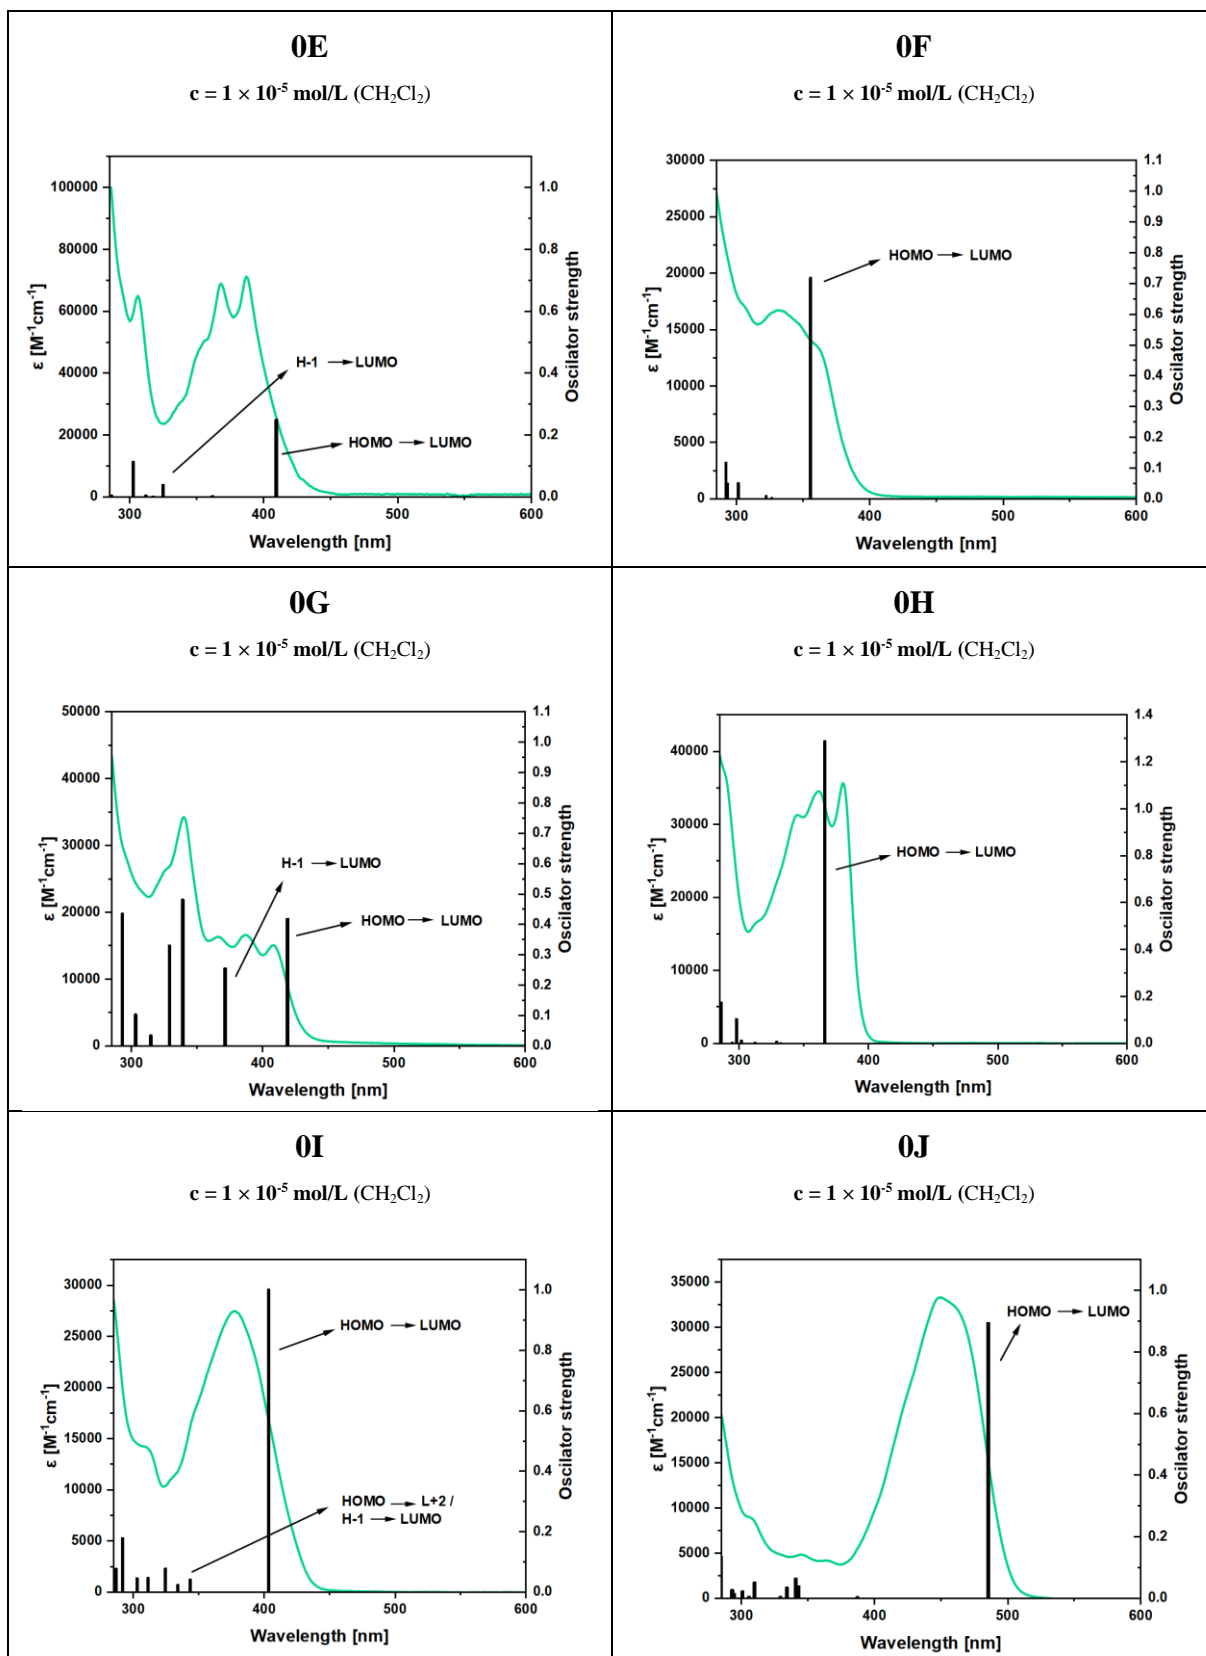

**Figure S11.** Experimental (green line) absorption spectra and calculated transitions (black sticks) of **0A–0J** in  $\text{CH}_2\text{Cl}_2$ .

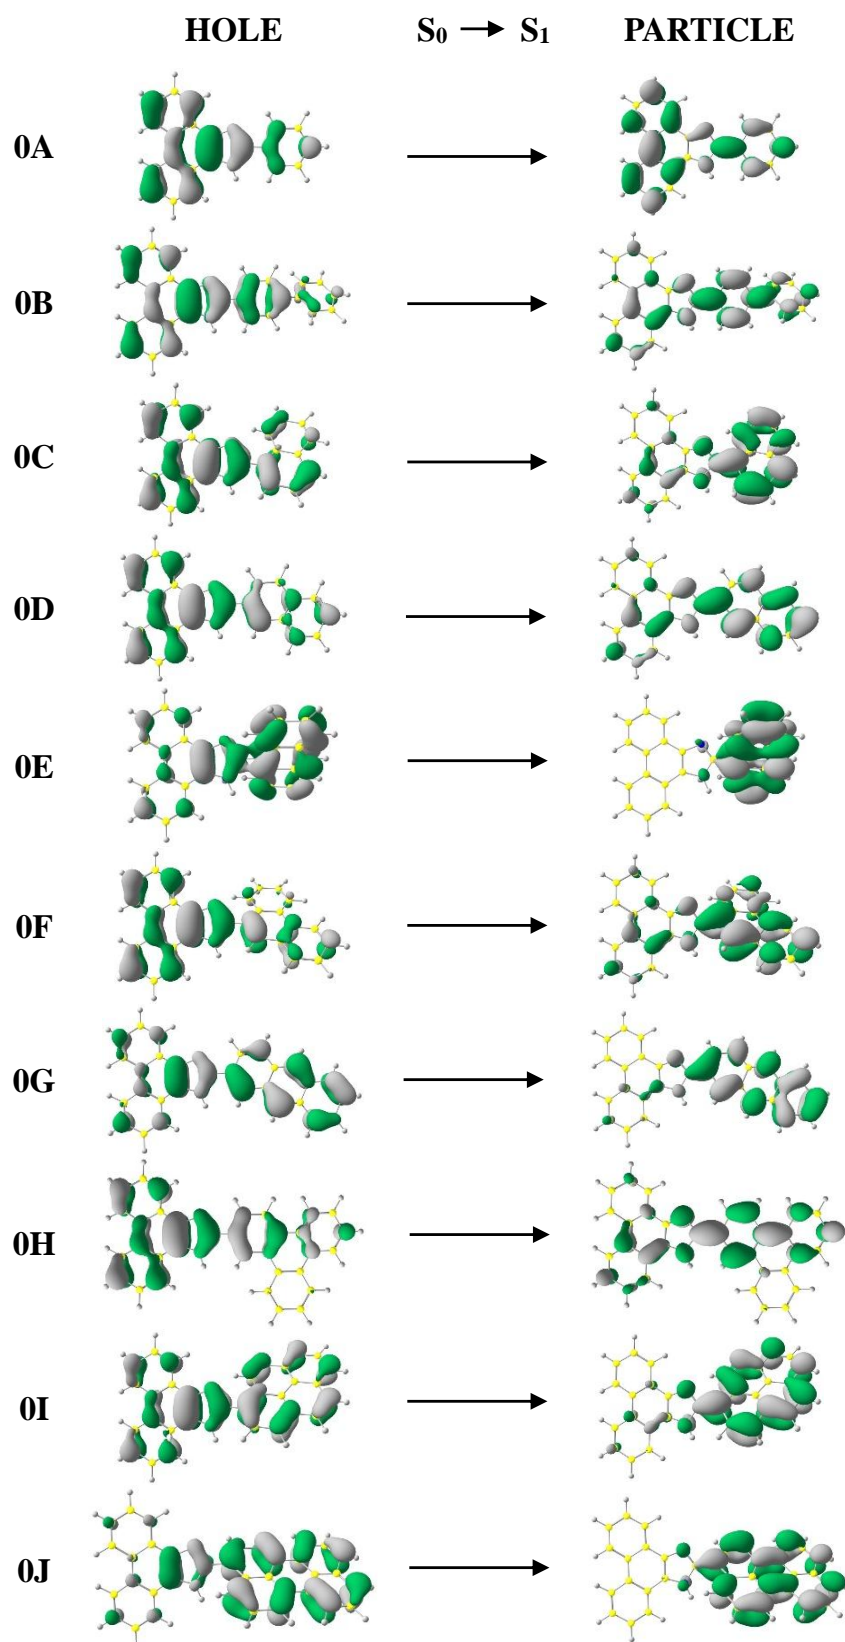

**Figure S12.** The  $S_0 \rightarrow S_1$  transition NTO.

## 8. Optical properties

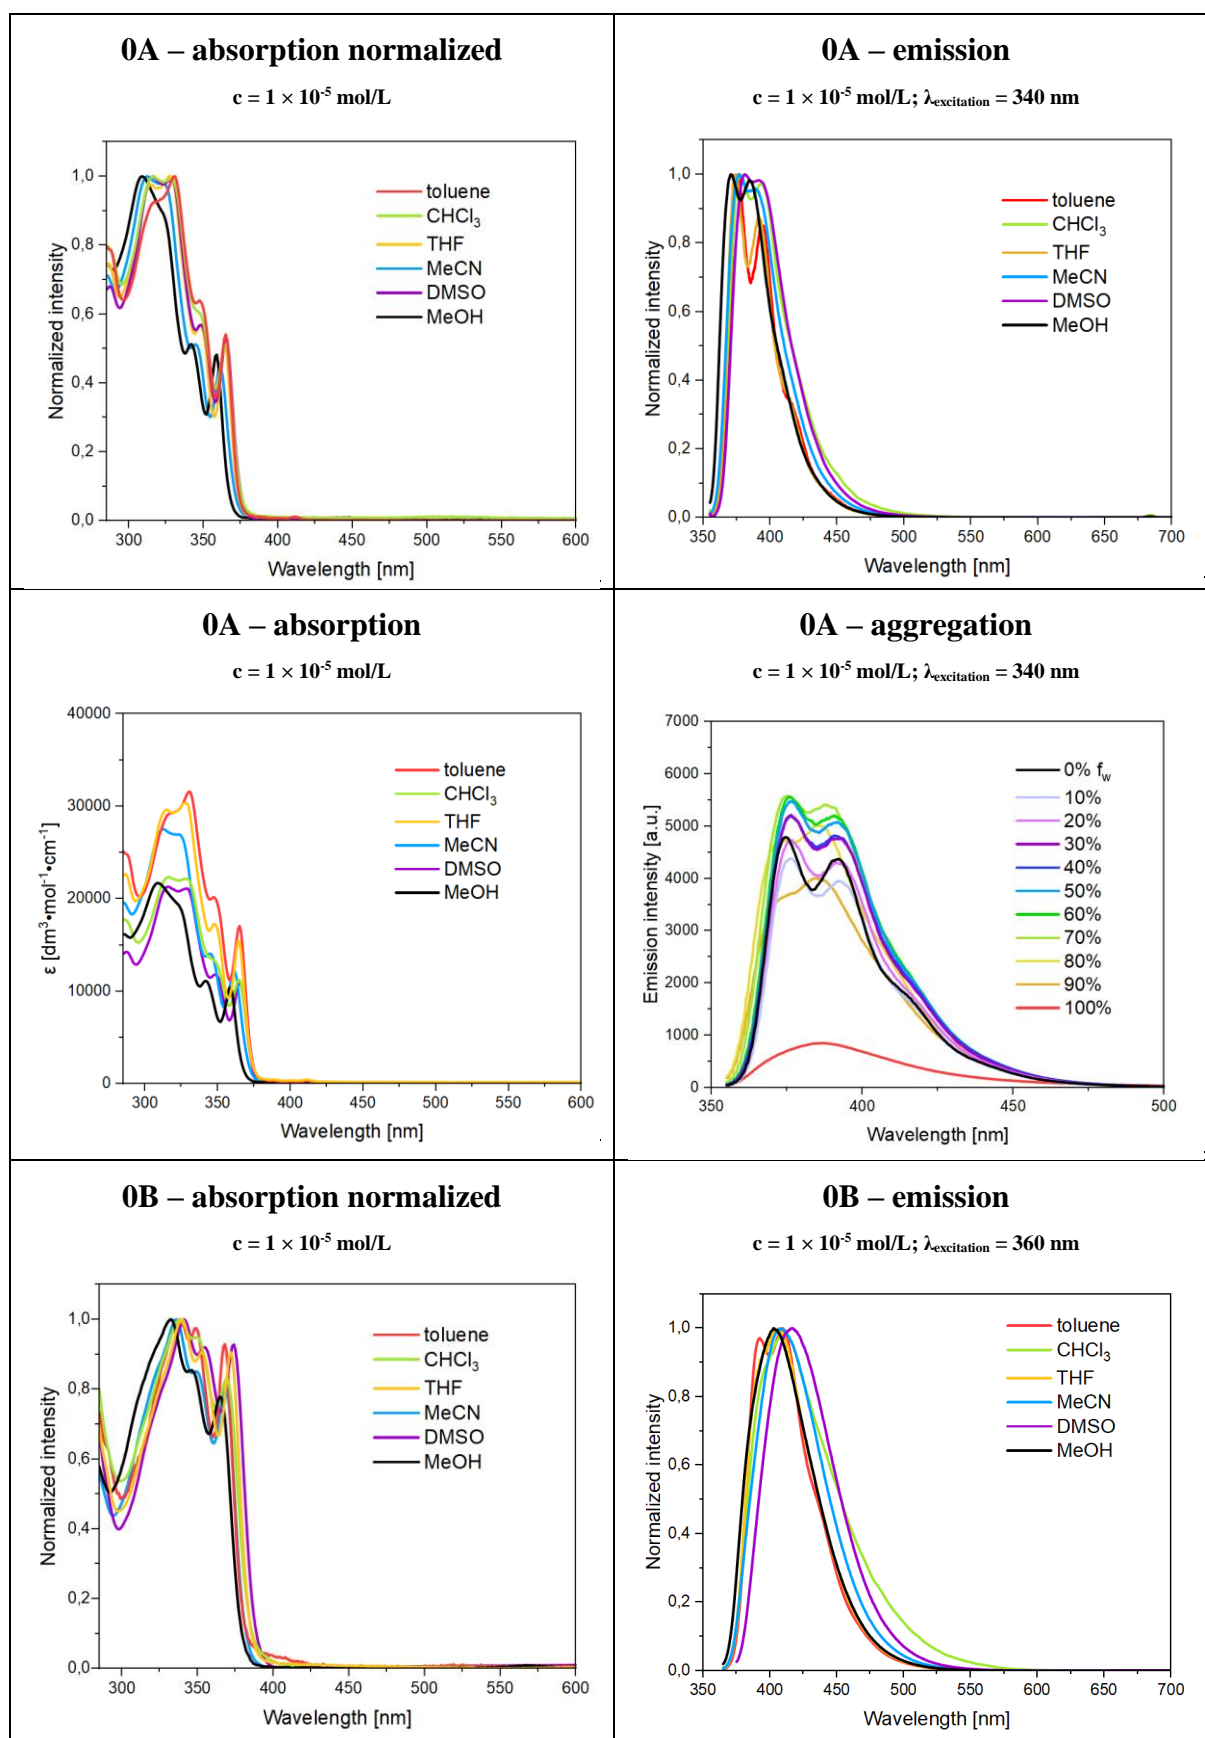

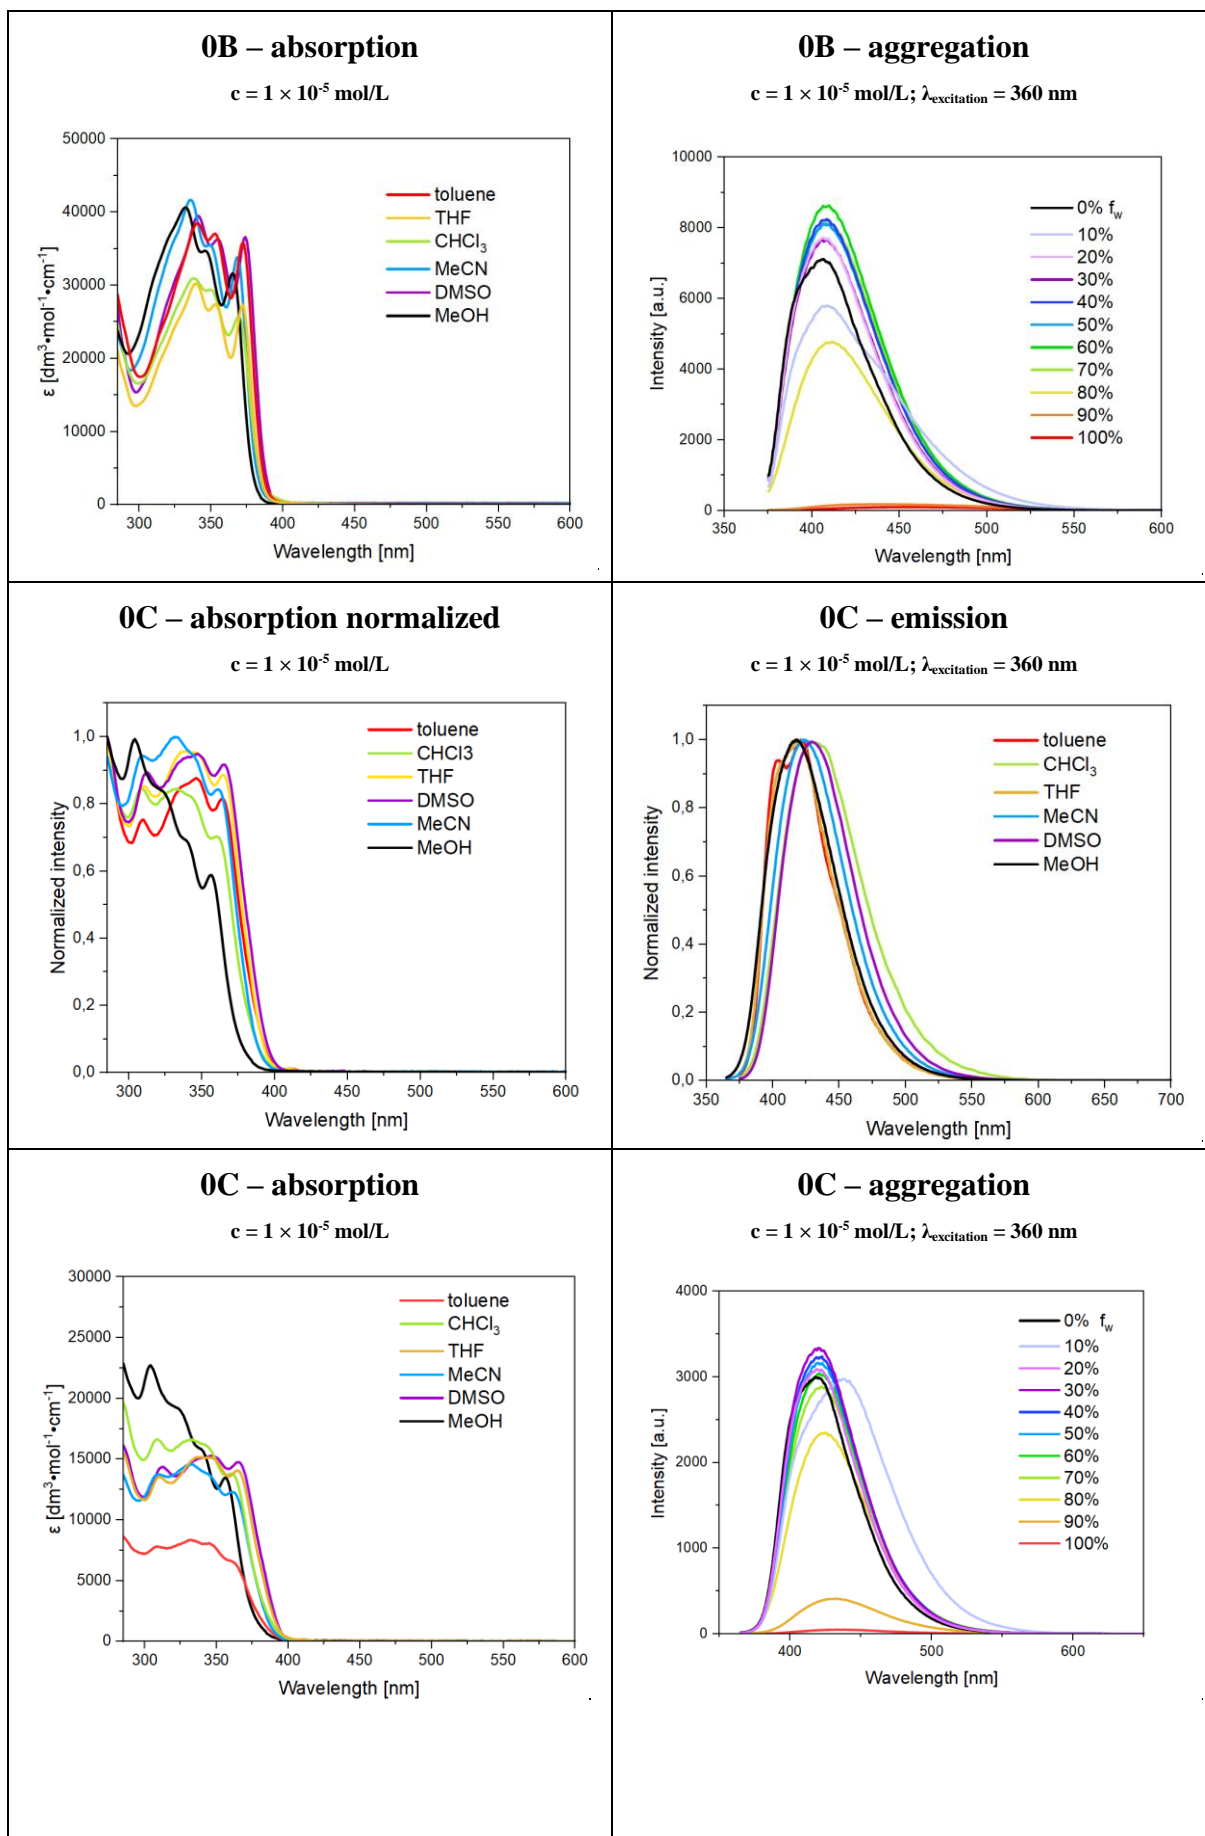

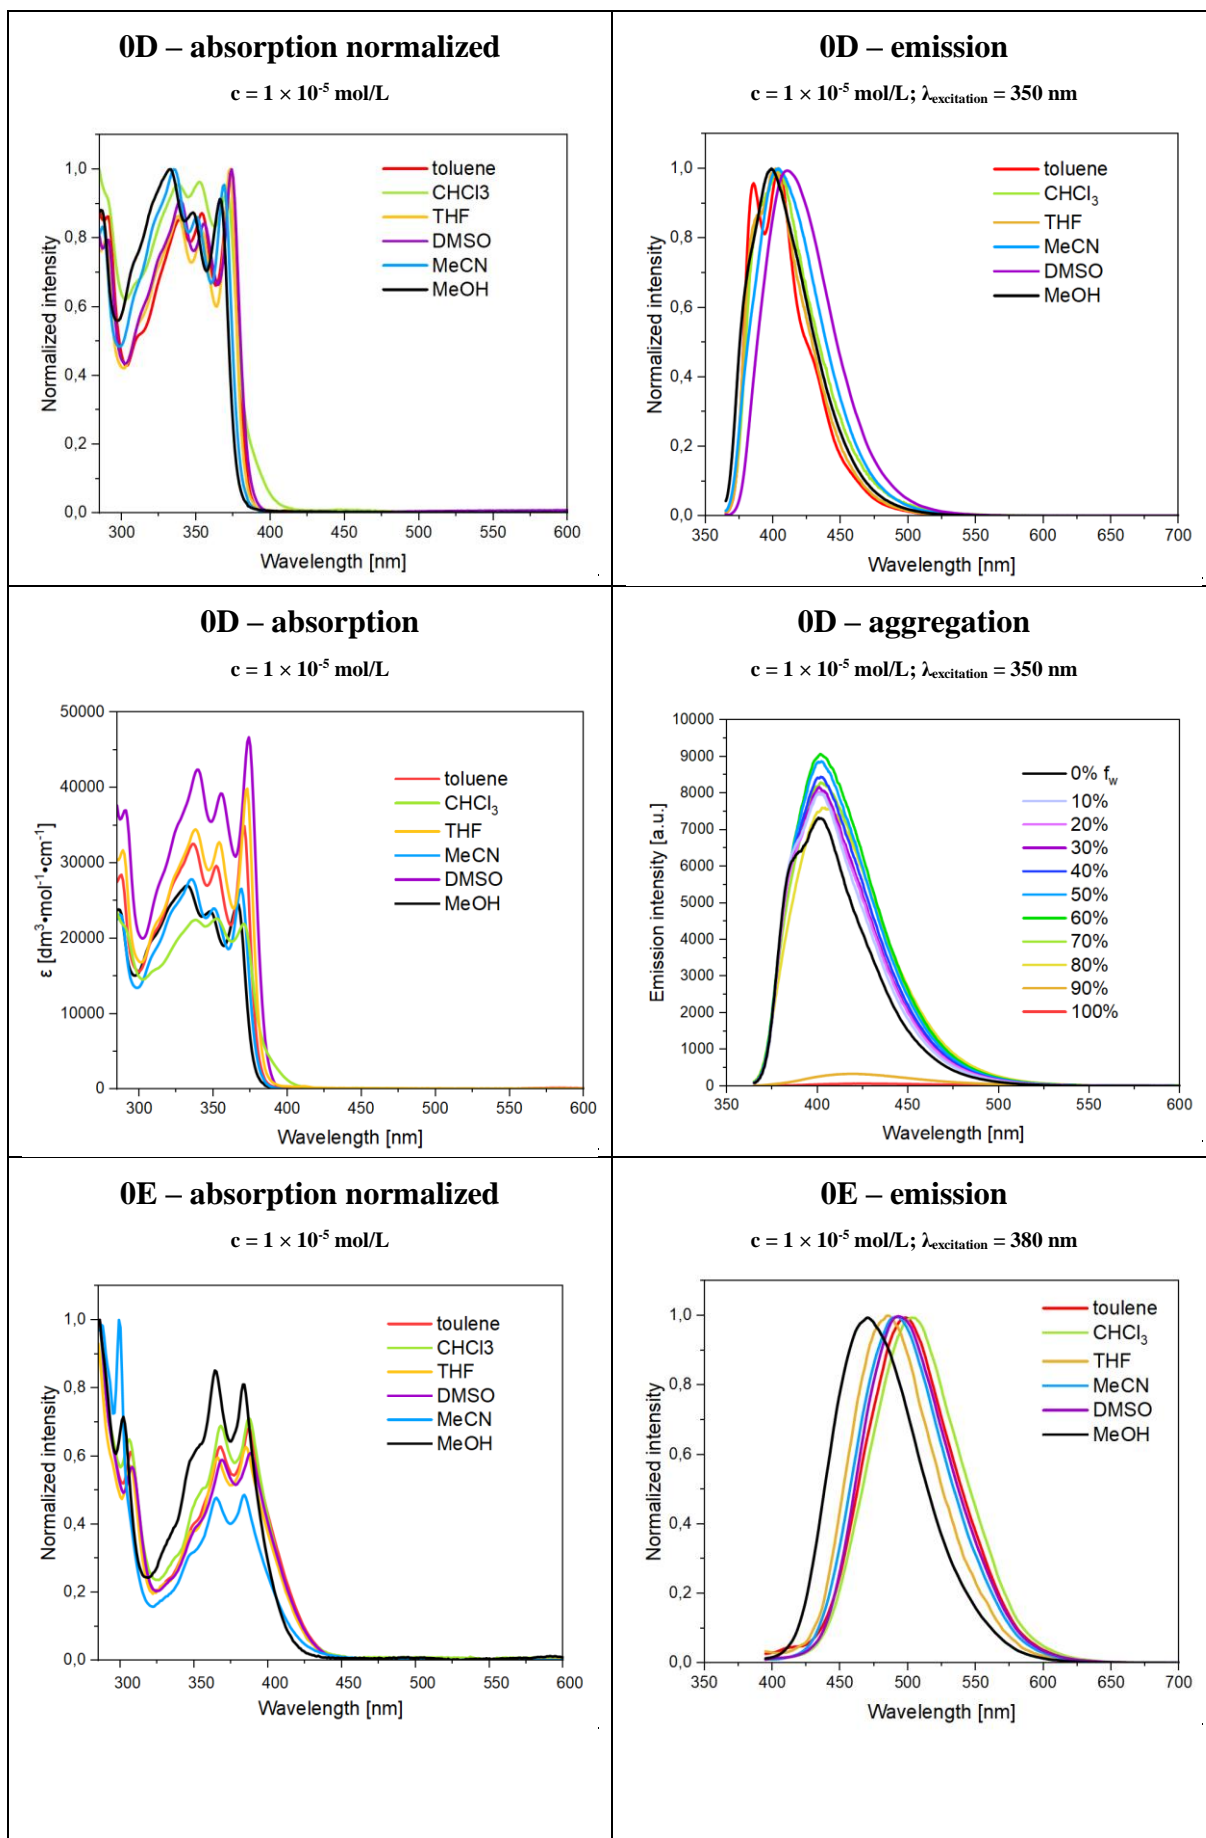

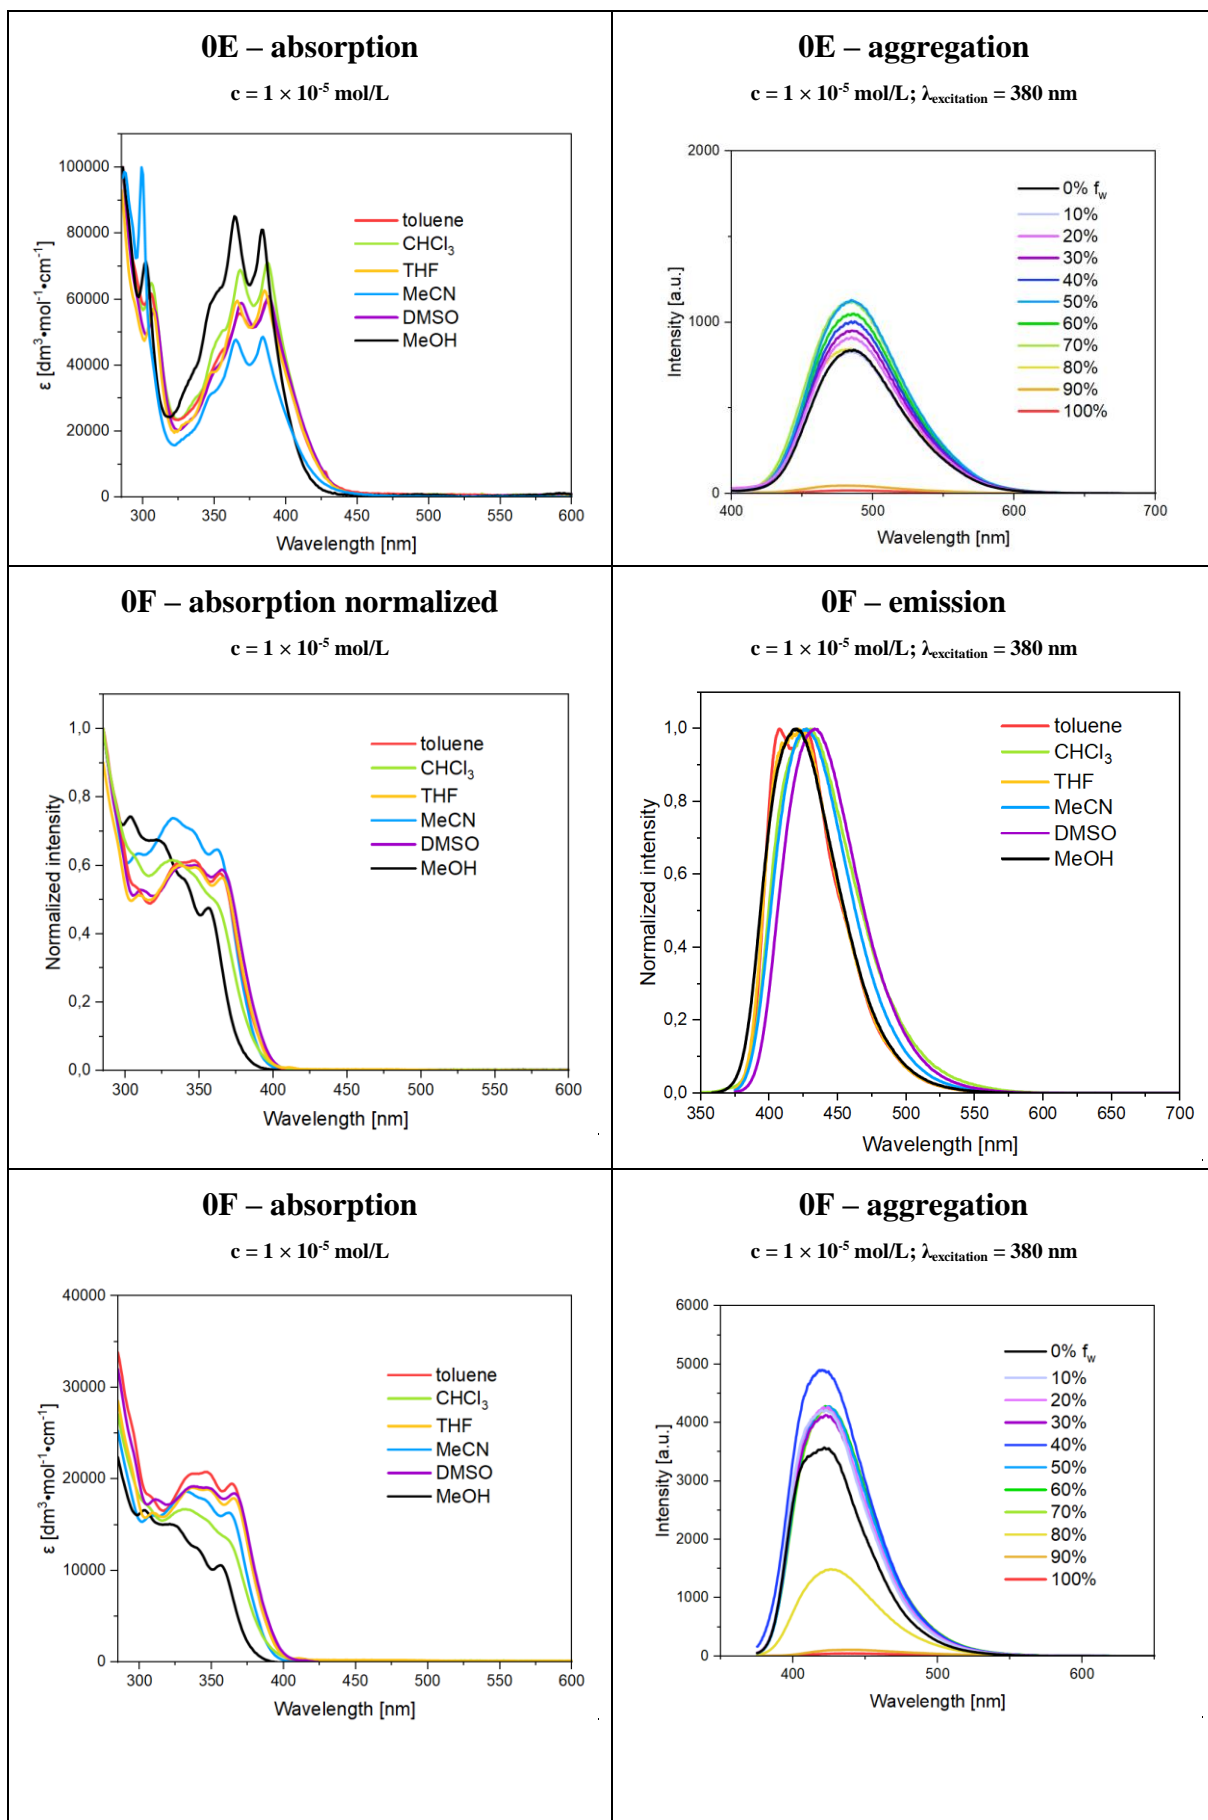

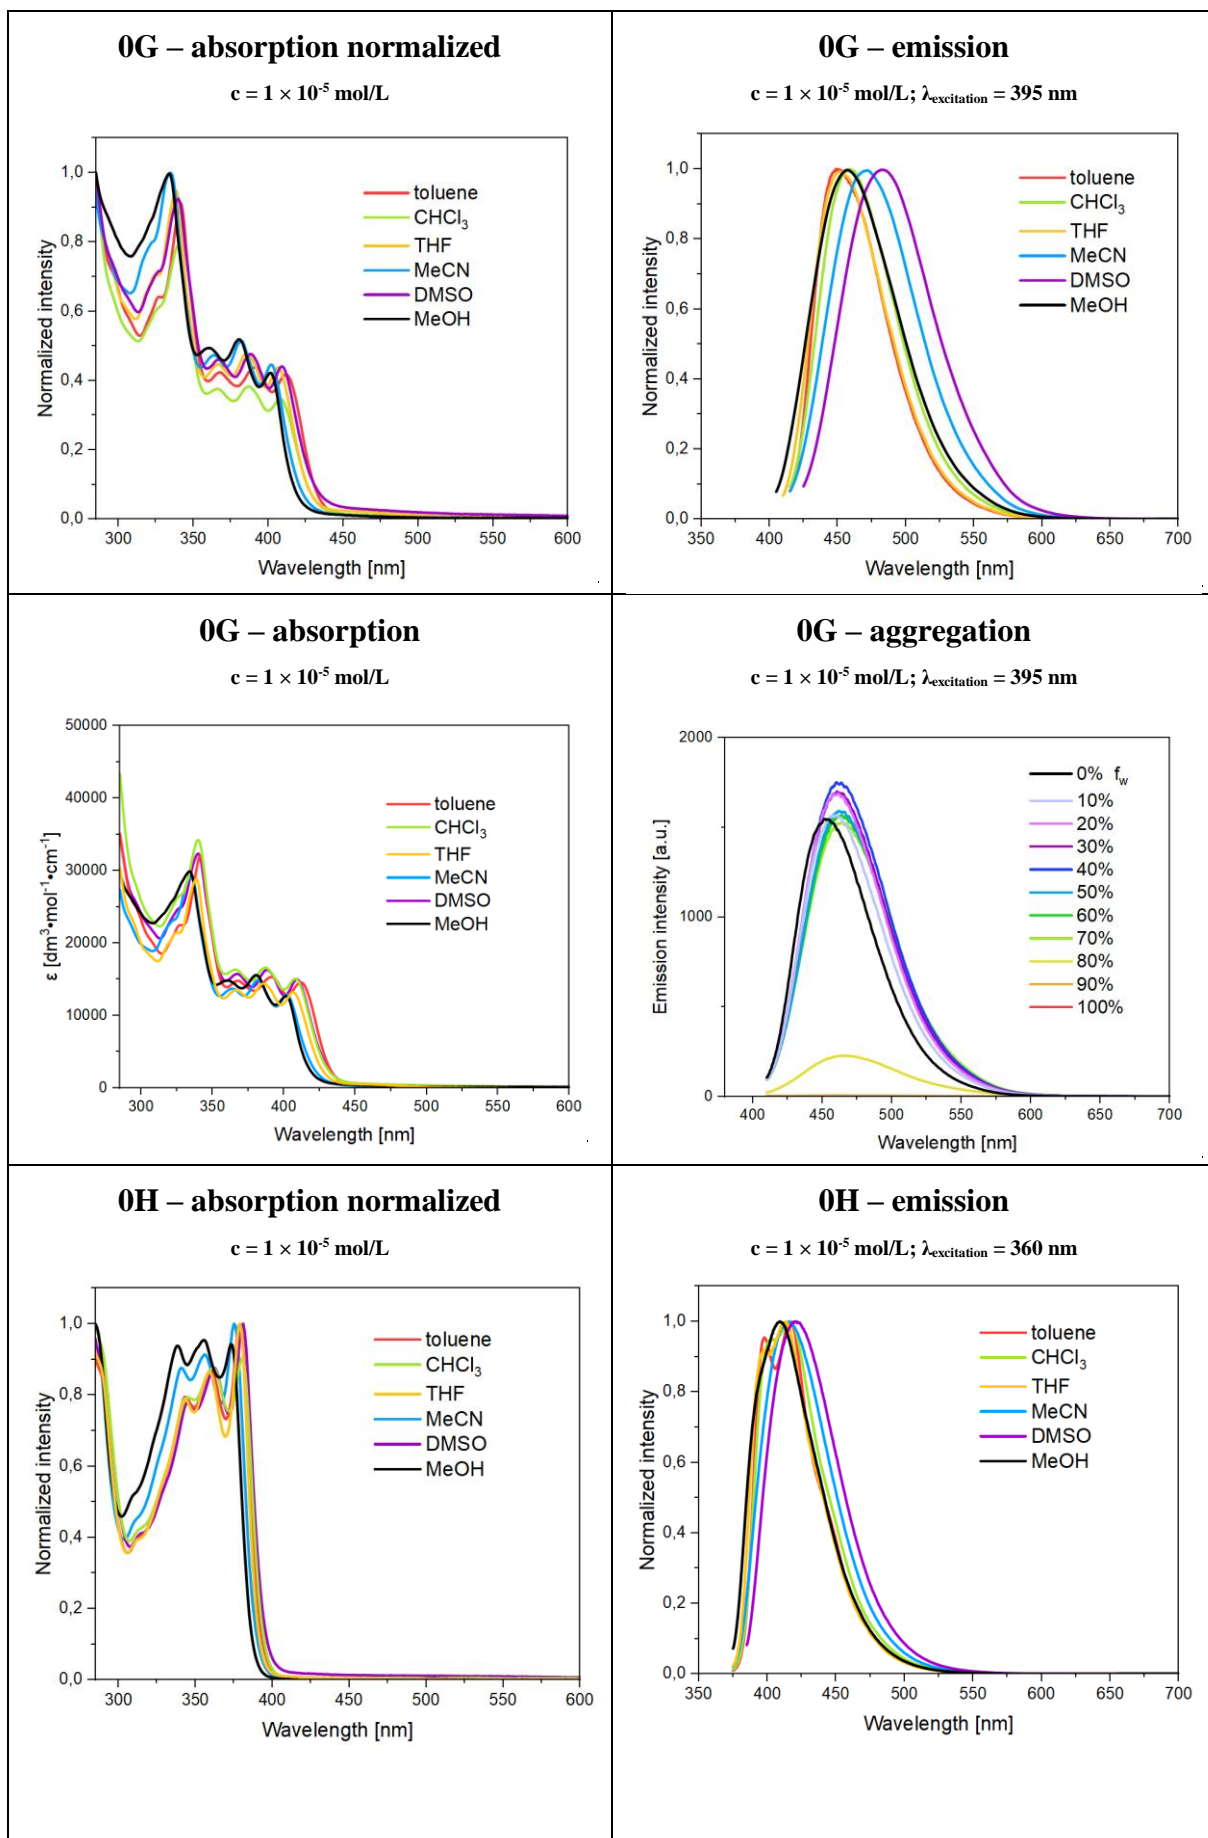

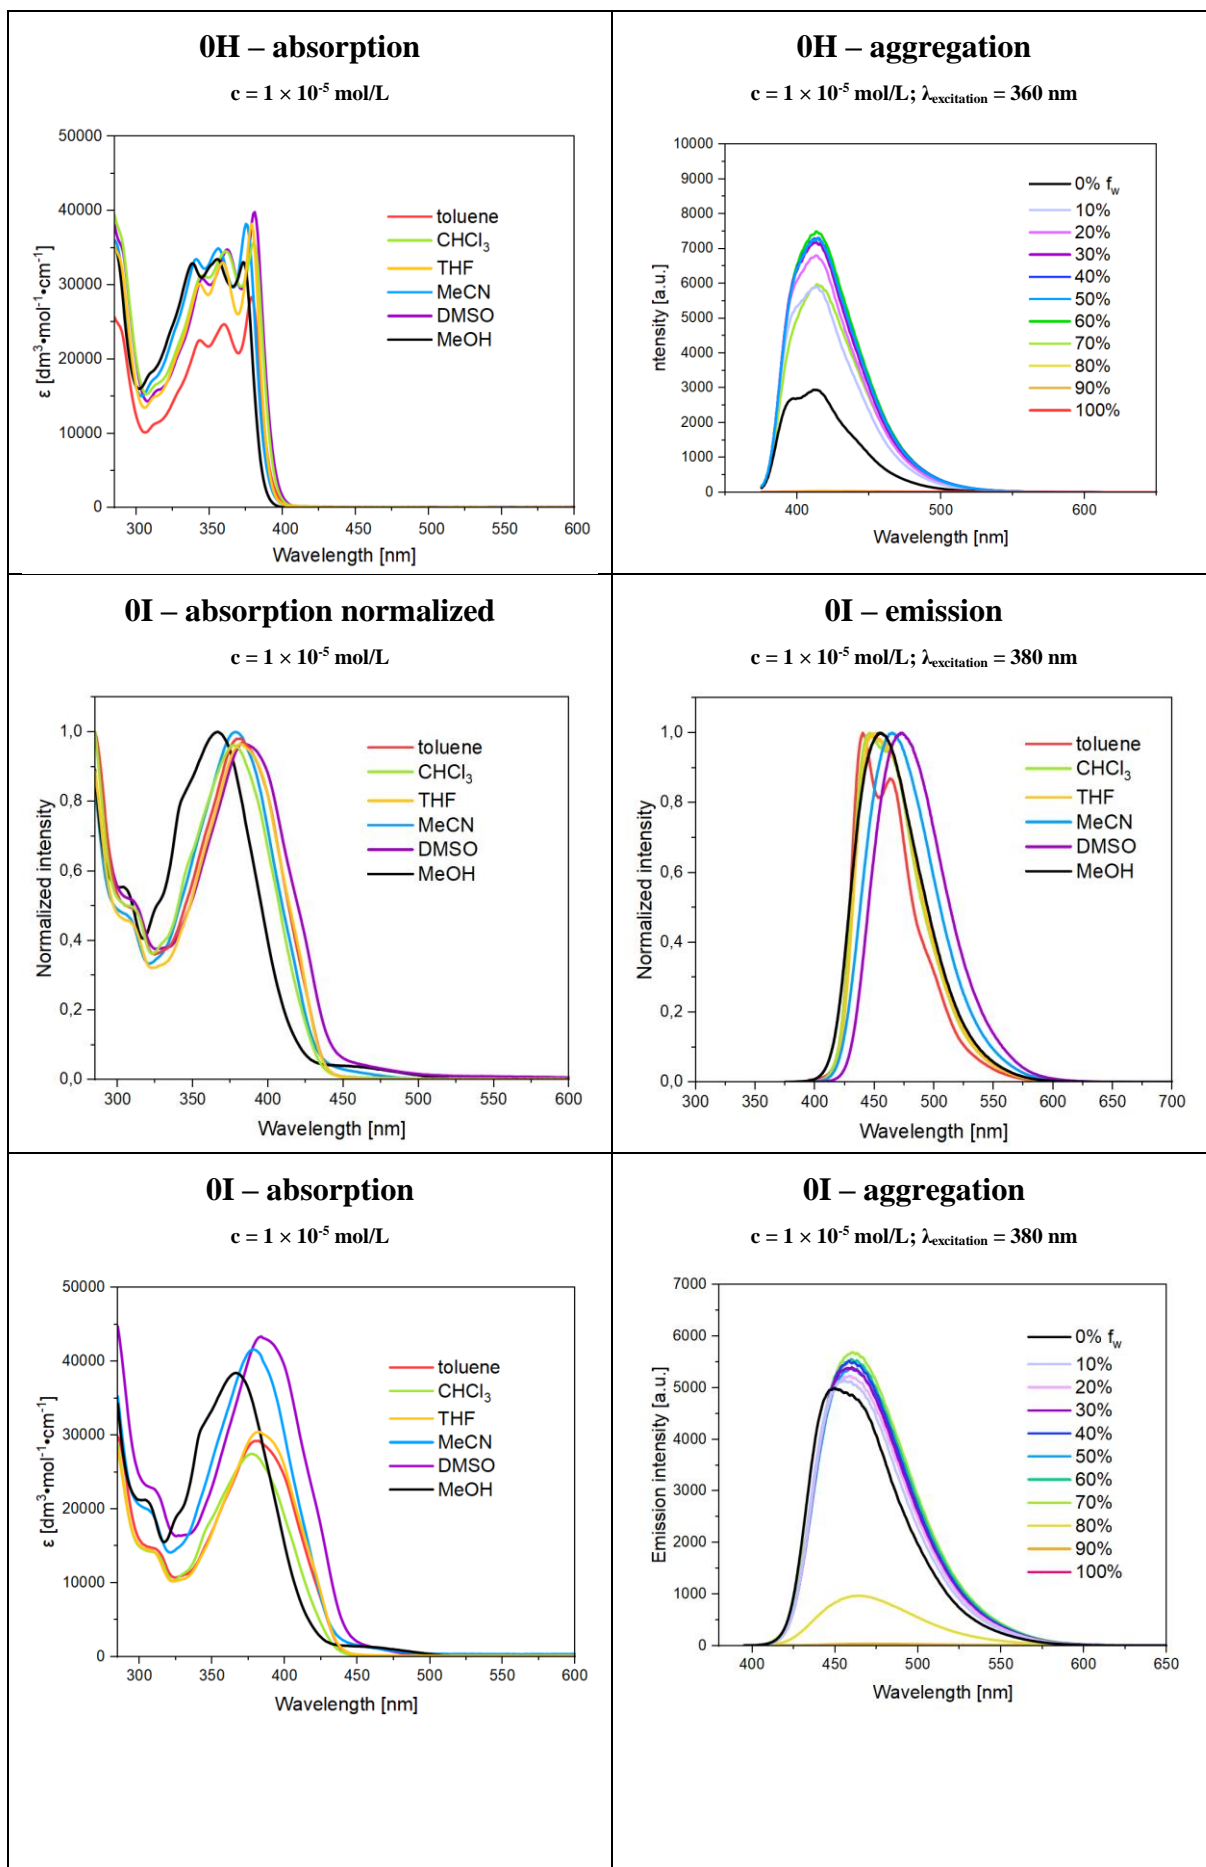

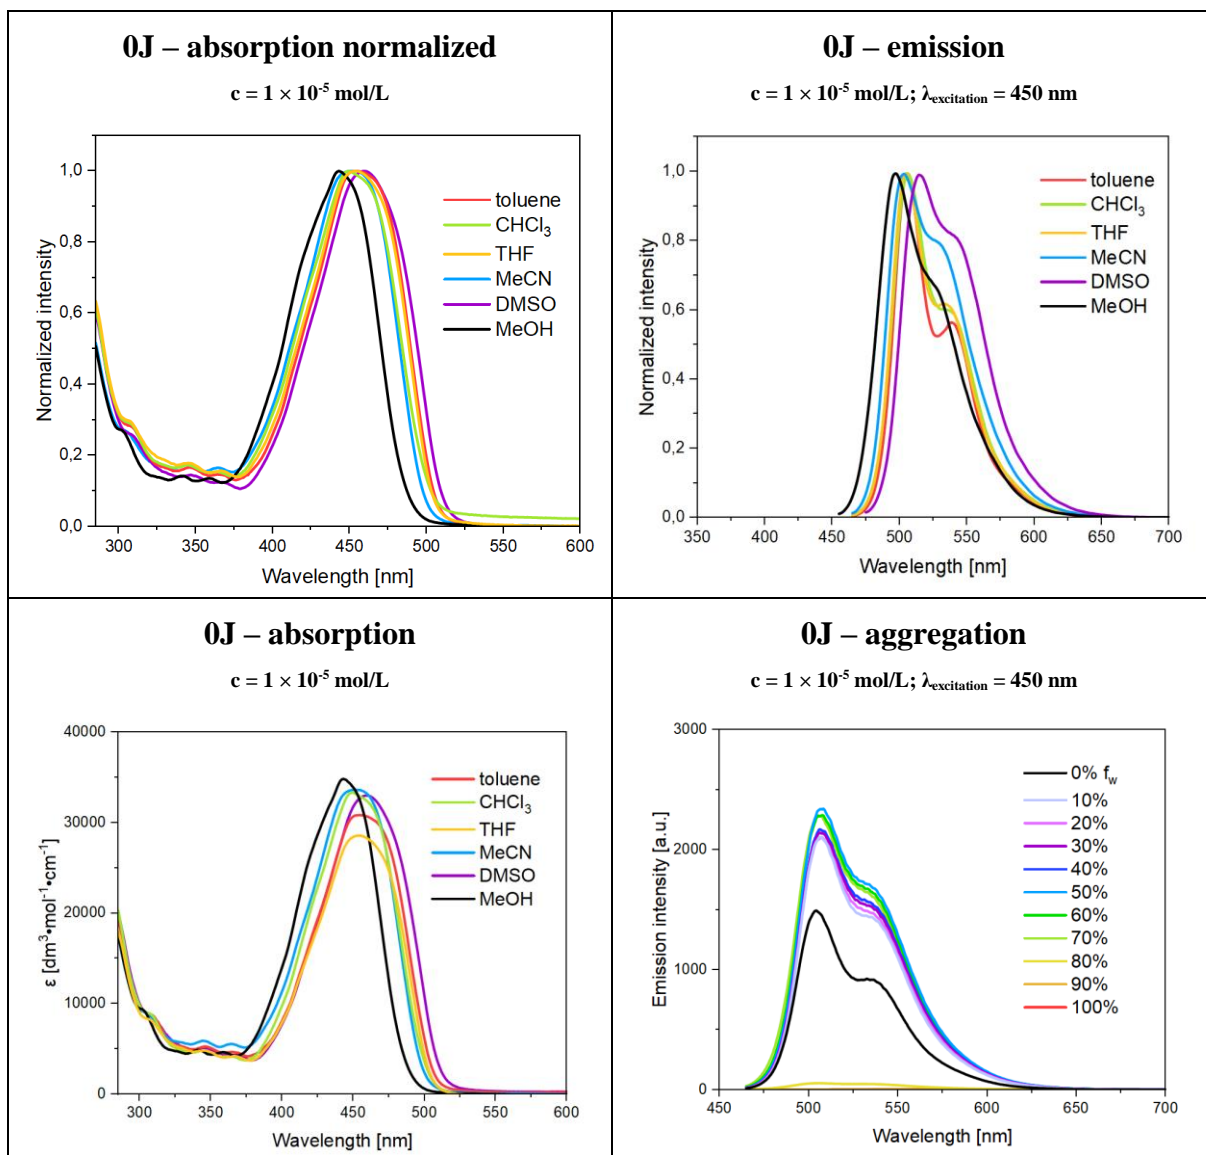

**Figure S13.** Absorption, emission and aggregation spectra of **0A–0J**.

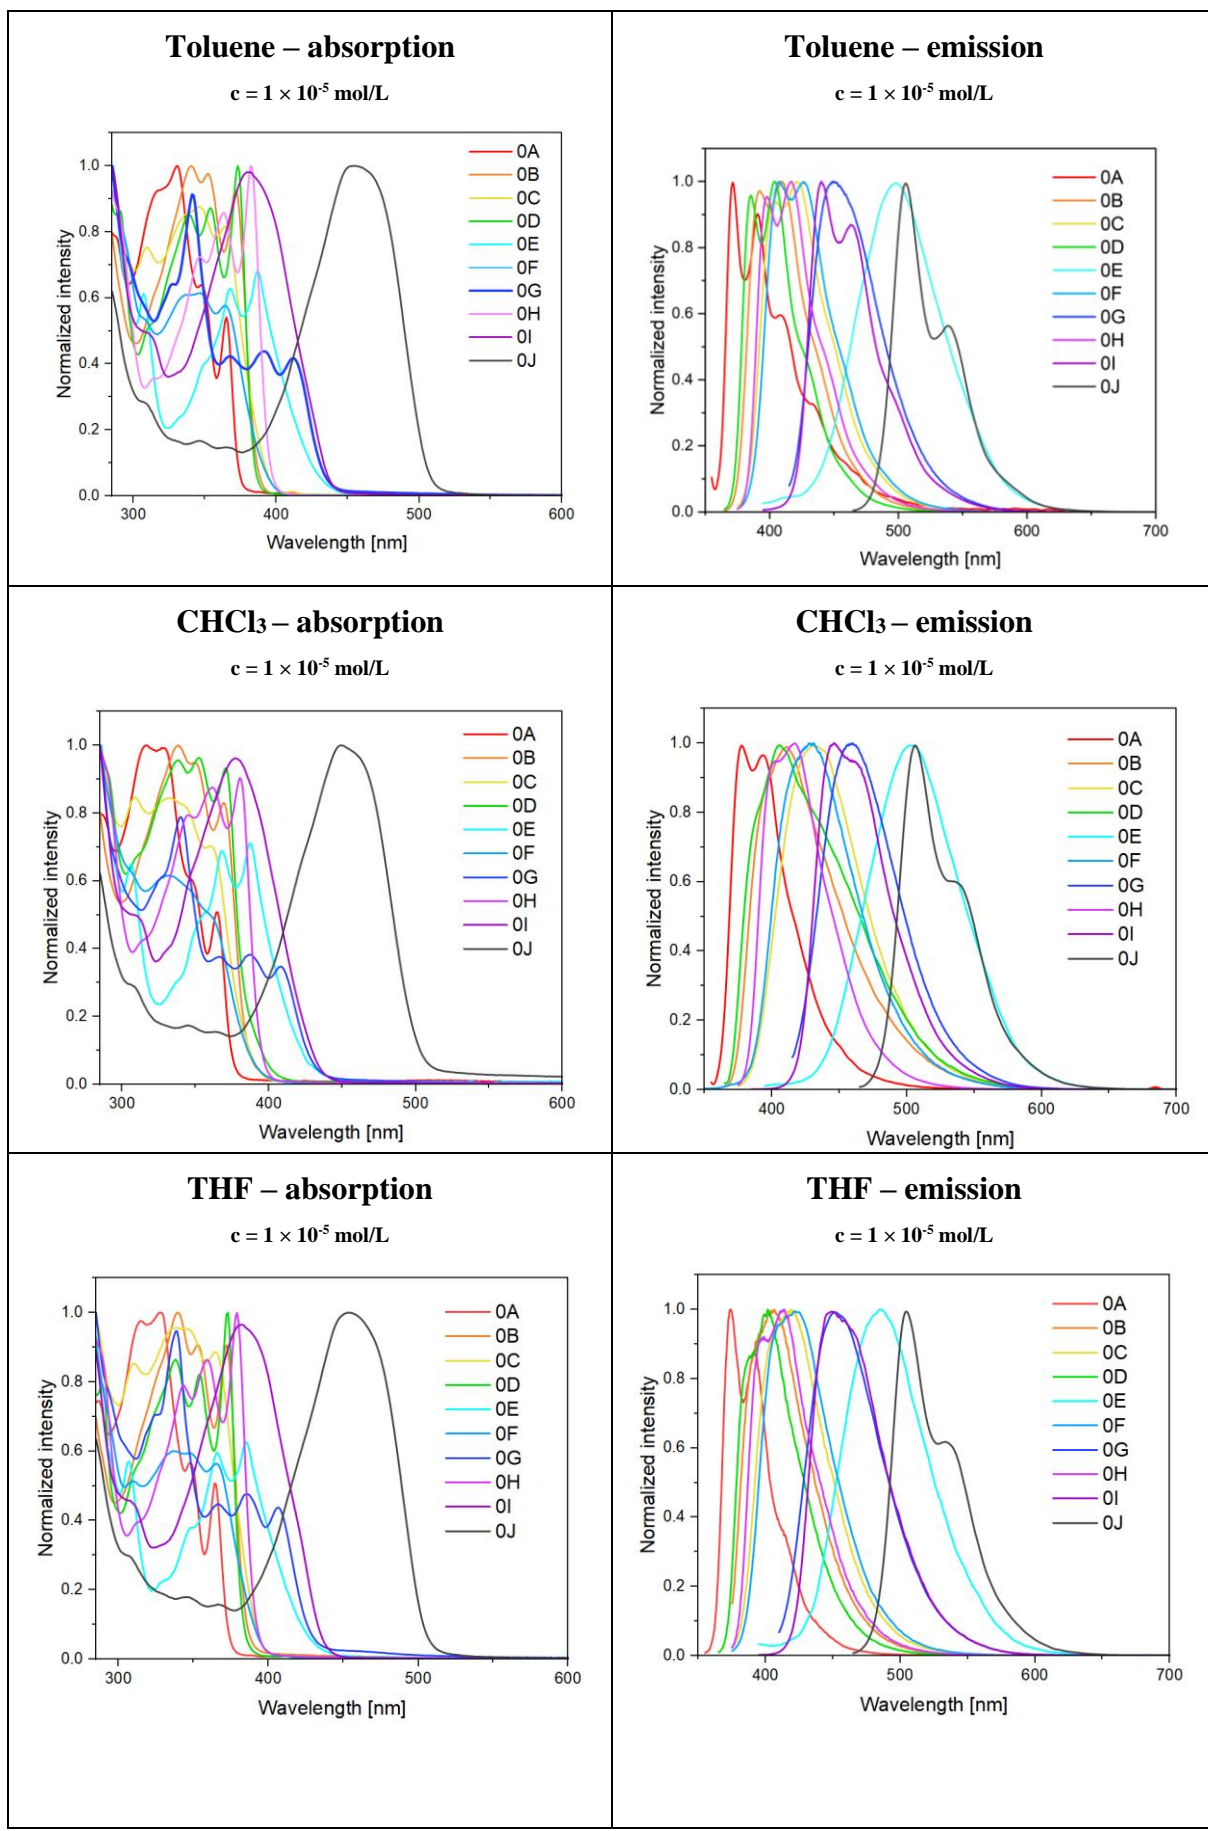

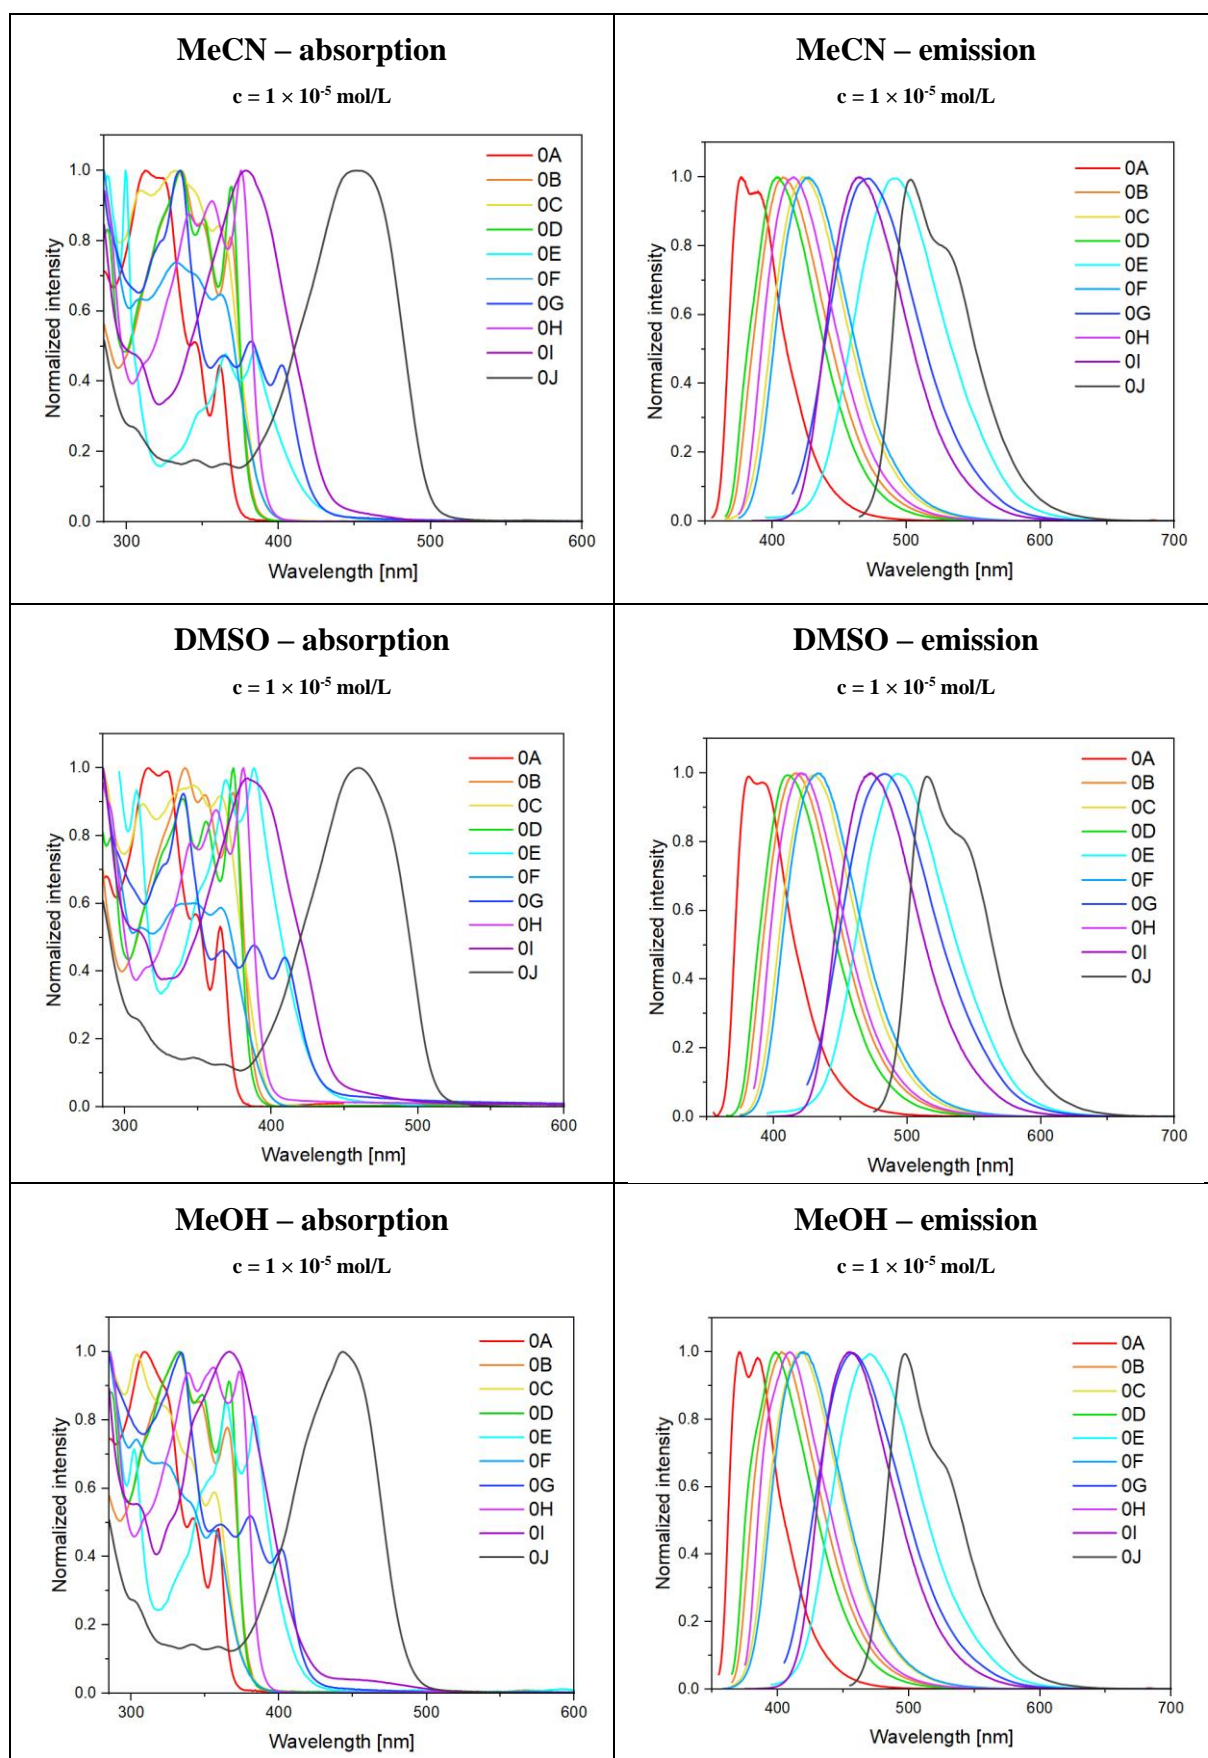

**Figure S14.** Comparison of absorption and emission behavior of **0A–0J** in solvents of varying polarity.

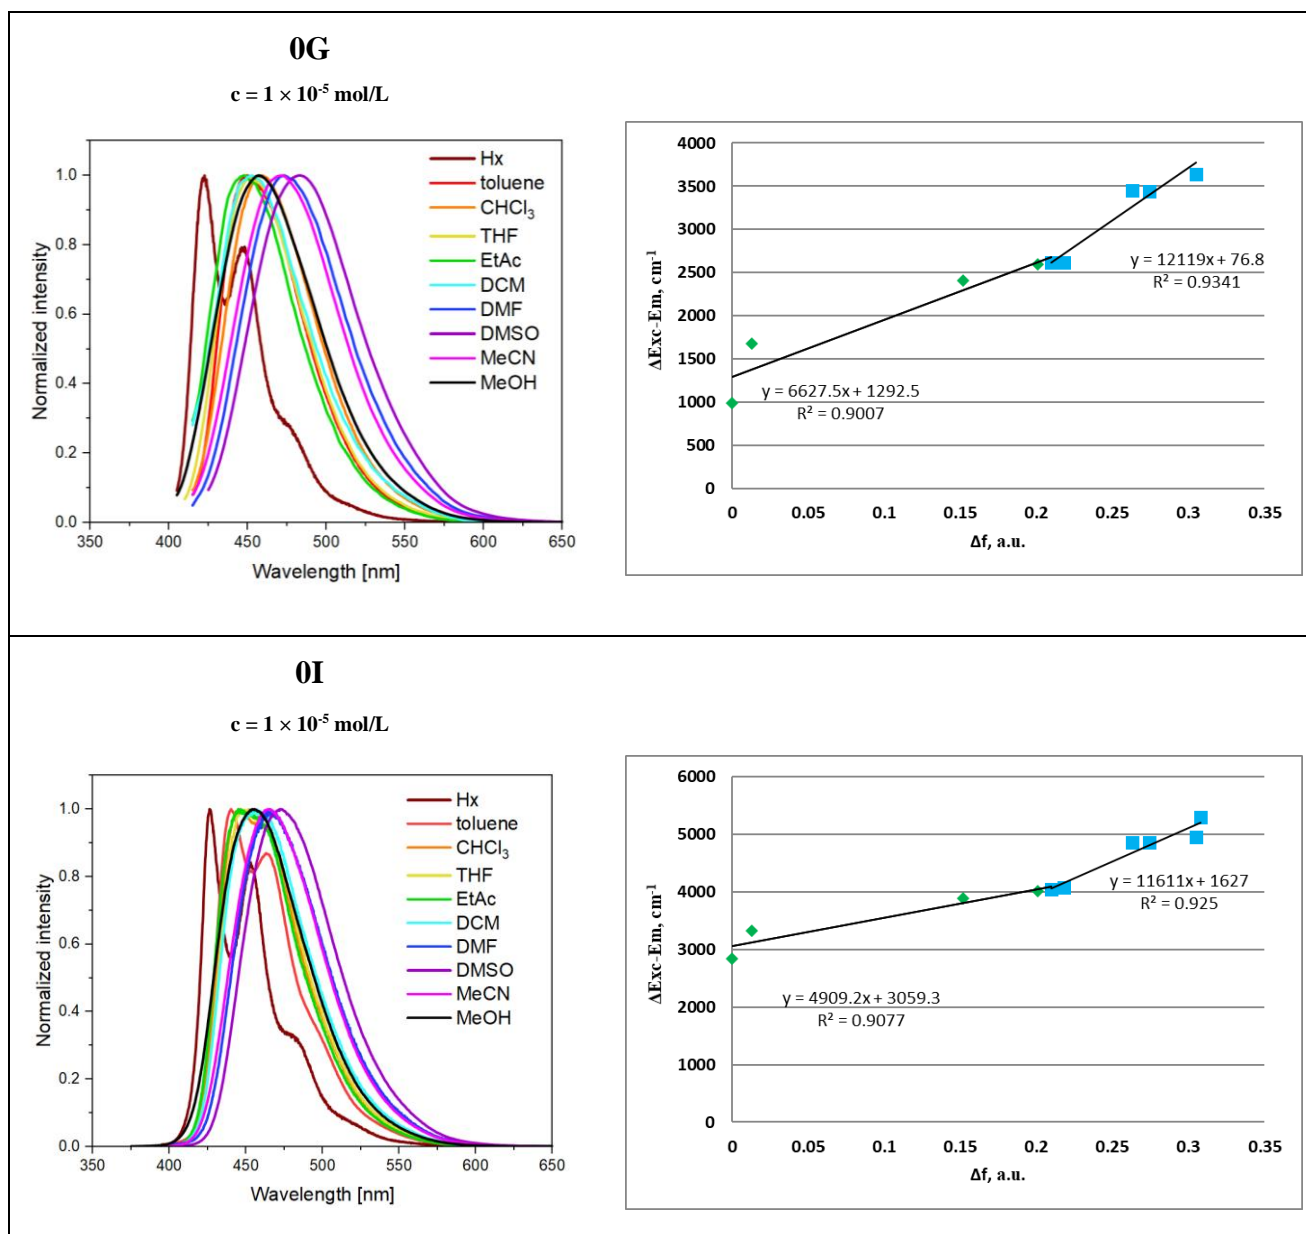

**Table S2.** Slope data and dipole moment values in low and high solubility solvents.

| Compound                                                               | 0G     | 0I     |
|------------------------------------------------------------------------|--------|--------|
| slope of the line on the Lippert-Mataga plot in low polarity solvents  | 6627   | 4909   |
| slope of the line on the Lippert-Mataga plot in high polarity solvents | 12119  | 11611  |
| $\Delta\mu$ in low polarity solvents                                   | 11.5 D | 9.9 D  |
| $\Delta\mu$ in high polarity solvents                                  | 15.5 D | 15.2 D |

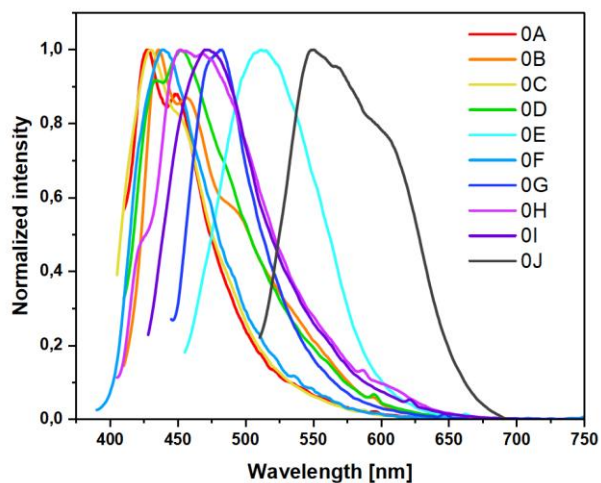

Figure S16. Solid-state spectra of **0A–0J**.

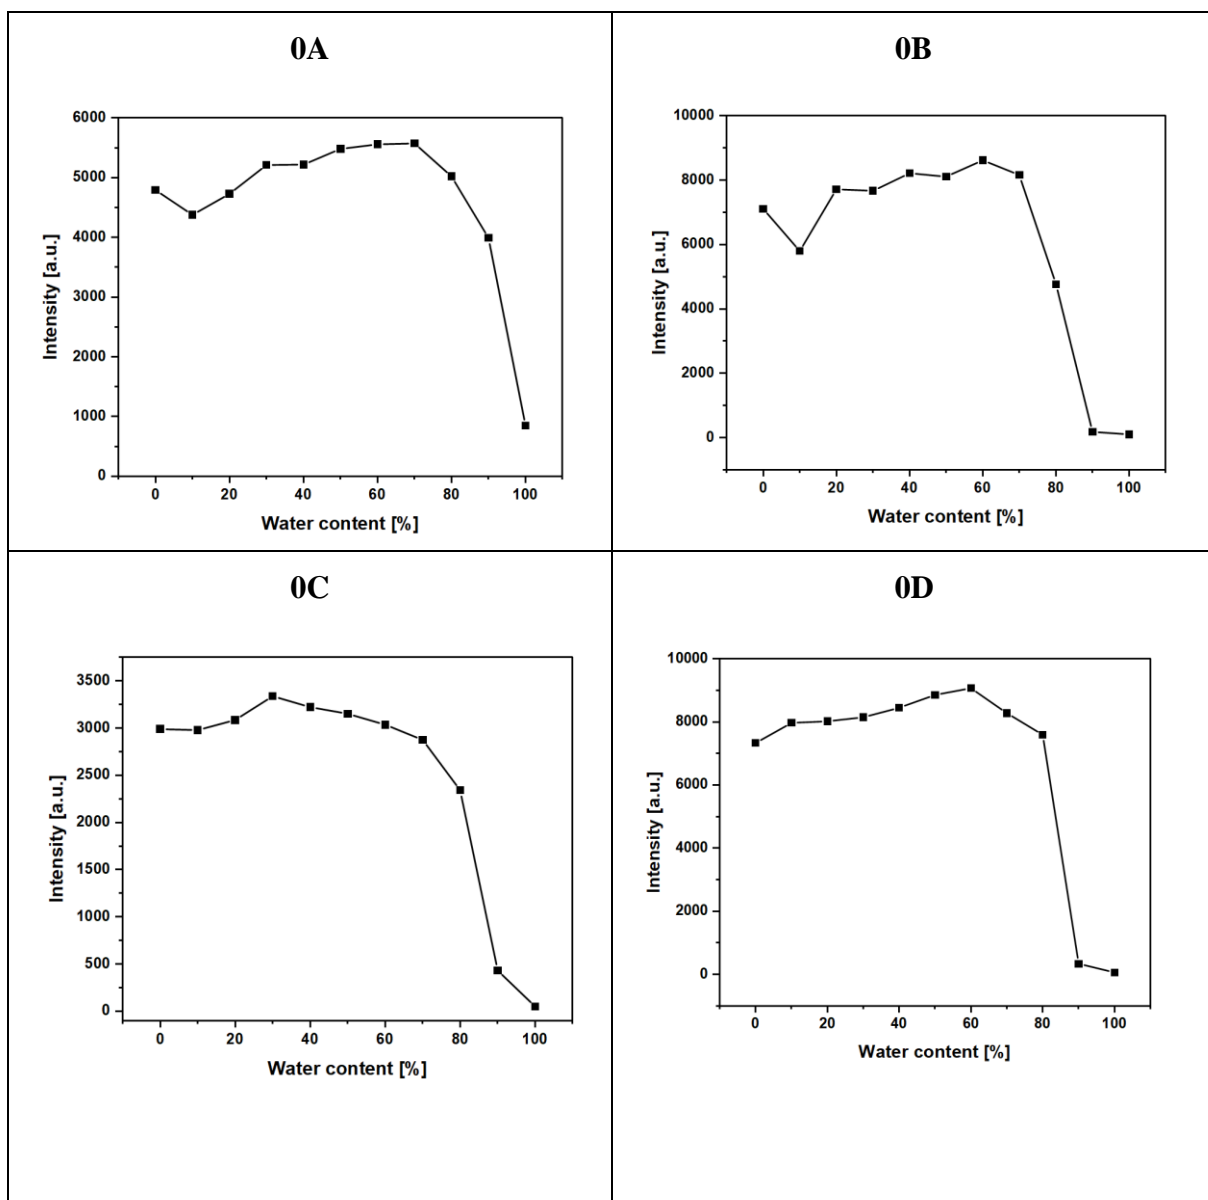

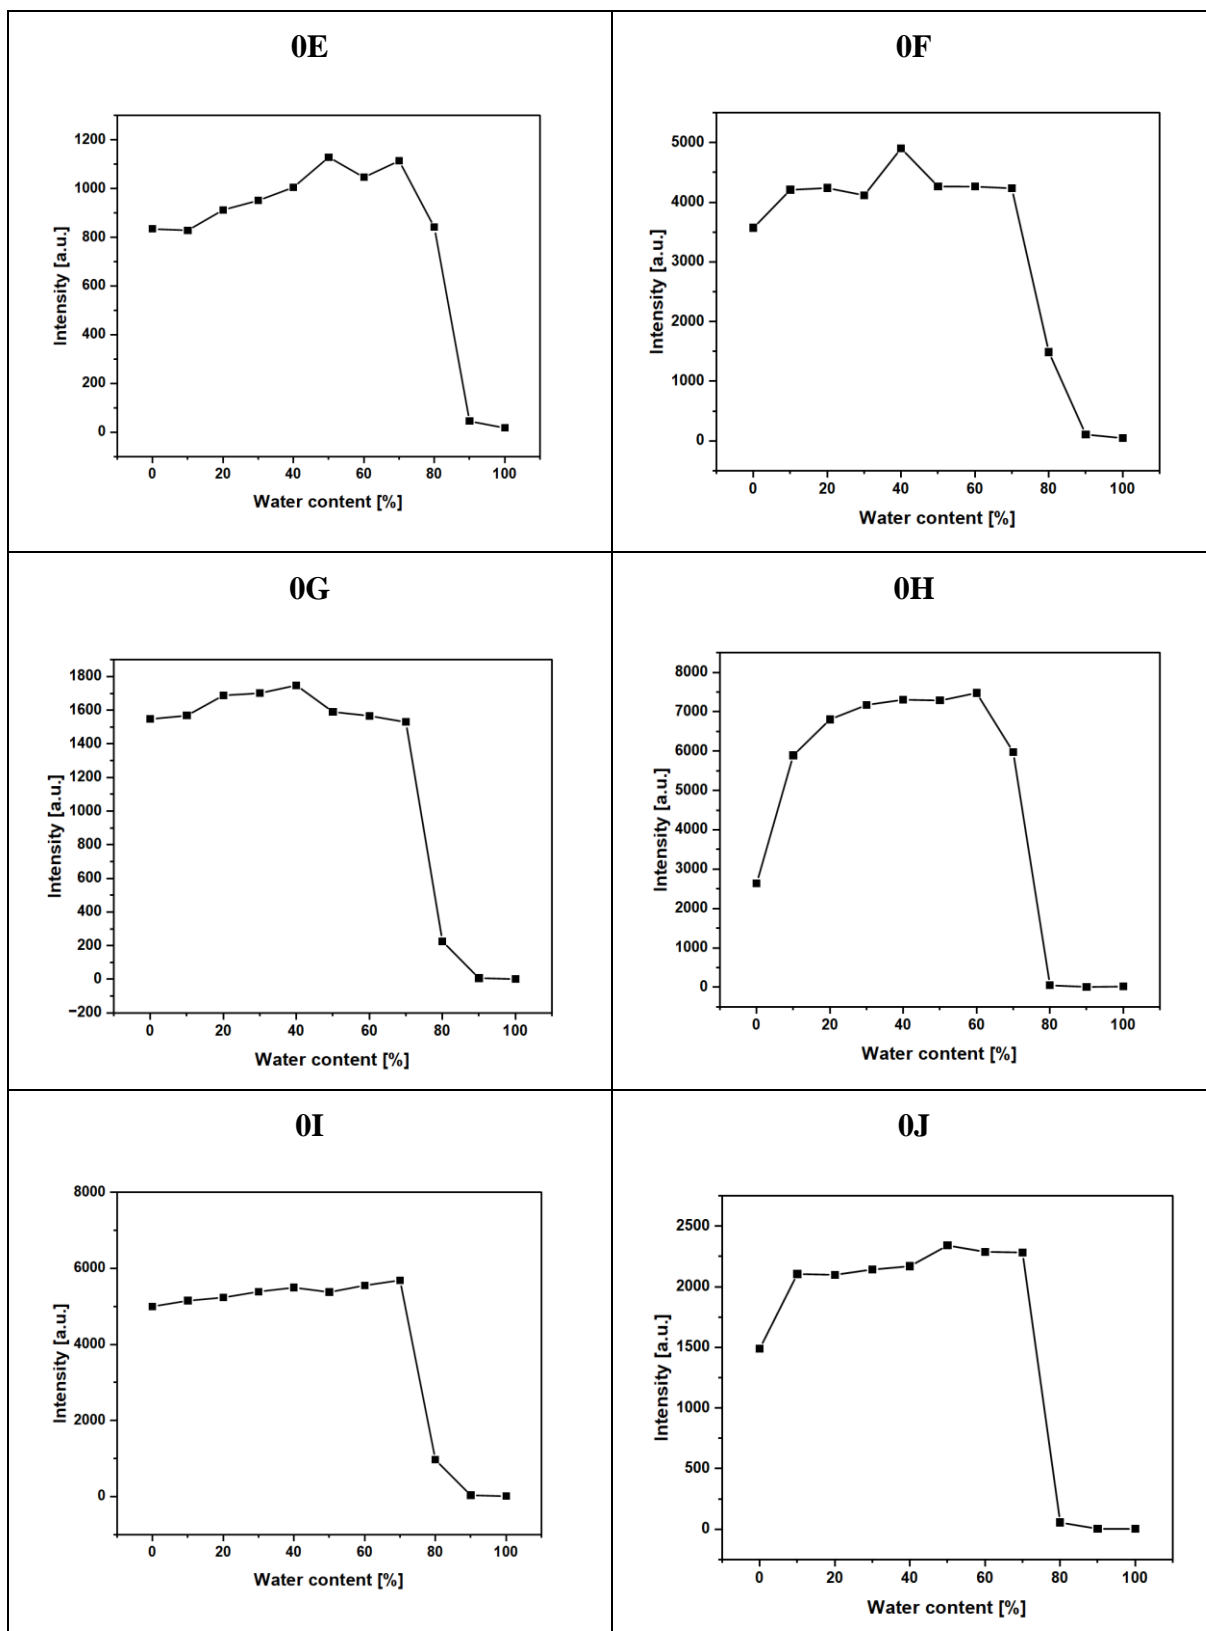

**Figure S17.** Change in the emission intensity of solutions in the aggregated state.

## 9. Photoluminescence and electroluminescent properties

Steady-state photoluminescence spectra were performed on a Edinburgh Instruments FLS980, with solvent studies performed in clean 1 cm path-length photoluminescence cuvettes (Aeika Cells). Films containing emitters in the Zeonex<sup>®</sup> matrix were prepared using toluene solvents, where the compounds and Zeonex<sup>®</sup> were initially dissolved. Subsequently, the solutions were mixed to obtain a specific concentration of the compound in the Zeonex<sup>®</sup> matrix (e.g., 1%), then then spin-coated at 2000 RPM onto sapphire substrates to form uniform layers. Samples in the CBP matrix were prepared in a chloroform solution and spin-coated at 3000 RPM onto sapphire substrates to form uniform layers.

**Devices:** The solution-processed OLEDs were fabricated using the spin-coating method with a 10% (*w/w*) concentration of the emitters in the CBP host. The device configuration was as follows: ITO/ PEDOT:PSS [poly(3,4-ethylenedioxythiophene):poly(styrenesulfonate) Clevios Al4083] (40 nm)/ PVKH [poly(*N*-vinylcarbazole), 1 100 000  $M_w$ ] (10 nm)/ emitter + CBP (30 nm)/ TmPyPB [1,3,5-Tris(3-pyridyl-3-phenyl)benzene] (40 nm)/LiF (1 nm)/Al (100 nm), with the last three layers deposited by evaporation. PEDOT:PSS was spin-coated after filtering at 3000 RPM for 45 s, resulting in 40 nm layers, and then annealed at 120 °C for 15 minutes. Emitters were spin-coated from a chloroform solution at 3000 RPM for 45 s without annealing. Organic semiconductors and aluminium were deposited at a rate of 1 Ås<sup>-1</sup>, and the LiF layer was deposited at 0.1 Ås<sup>-1</sup>. All materials were purchased from Heraeus (PEDOT:PSS) Sigma Aldrich or Lumtec and small molecules were purified by temperature-gradient sublimation in a vacuum. OLEDs have been fabricated on pre-cleaned, patterned indium-tin-oxide (ITO) coated glass substrates with a sheet resistance of 20 Ω/sq and ITO thickness of 100 nm. The sizes of pixels were 4 mm<sup>2</sup>, 8 mm<sup>2</sup> and 16 mm<sup>2</sup>. The characteristics of the devices were recorded using a 3,3-inch integrating sphere (Labsphere) inside the glovebox connected to a Source Meter Unit Keithley 2400 and Avantes Avaspec-ULS2048CL spectrometer.

## 10. Comparison of the results from this study with data reported in the literature

**Table S3.** Comparison of selected physicochemical properties of **0A–0J** derivatives and OLED parameters with literature data.

| Compound        | T <sub>m</sub> /T <sub>5</sub> (°C) | HOMO/LUMO (eV) | E <sub>gopt</sub> (eV) | PLQY <sub>sol/film</sub> (%)                                      | λ <sub>EL</sub> (nm) | L <sub>max</sub> (cd/m <sup>2</sup> ) | EQE <sub>max</sub> (%) | CIE (x,y)      | Ref.      |
|-----------------|-------------------------------------|----------------|------------------------|-------------------------------------------------------------------|----------------------|---------------------------------------|------------------------|----------------|-----------|
| <b>0A</b>       | -/292                               | -5.86/-1.45    | 3.31                   | DMSO 0.33 (QY <sub>AE</sub> )<br>CHCl <sub>3</sub><br>15/18 (CBP) | 402 (CBP film)       | 6963                                  | 2.67                   | 0.1925, 0.1633 | This work |
| <b>0B</b>       | 270/337                             | -5.80/-1.67    | 3.22                   | DMSO 0.47 (QY <sub>AE</sub> )<br>CHCl <sub>3</sub><br>30/13 (CBP) | 420 (CBP film)       | 3578                                  | 1.03                   | 0.1819, 0.1311 | This work |
| <b>0C</b>       | 228/308                             | -5.85/-1.68    | 3.16                   | DMSO 0.29 (QY <sub>AE</sub> )<br>CHCl <sub>3</sub><br>17/18 (CBP) | 430 (CBP film)       | 1963                                  | 1.20                   | 0.1645, 0.0849 | This work |
| <b>0D</b>       | 248/314                             | -5.82/-1.74    | 3.20                   | DMSO 0.35 (QY <sub>AE</sub> )<br>CHCl <sub>3</sub> 24/5 (CBP)     | 421 (CBP film)       | 3000                                  | 0.37                   | 0.2035, 0.2037 | This work |
| <b>0E</b>       | -/327                               | -5.80/-2.14    | 2.94                   | DMSO 0.29 (QY <sub>AE</sub> )<br>CHCl <sub>3</sub><br>23/13 (CBP) | 477 (CBP film)       | 4221                                  | 2.62                   | 0.1828, 0.2634 | This work |
| <b>0F</b>       | -/313                               | -5.86/-1.72    | 3.20                   | DMSO 0.34 (QY <sub>AE</sub> )<br>CHCl <sub>3</sub><br>20/18 (CBP) | 435 (CBP film)       | 5192                                  | 1.23                   | 0.1670, 0.1017 | This work |
| <b>0G</b>       | 271/313                             | -5.68/-2.17    | 2.87                   | DMSO 0.30 (QY <sub>AE</sub> )<br>CHCl <sub>3</sub><br>39/15 (CBP) | 459 (CBP film)       | 3620                                  | 1.11                   | 0.1714, 0.1417 | This work |
| <b>0H</b>       | 298/363                             | -5.80/-1.78    | 3.16                   | DMSO 0.46 (QY <sub>AE</sub> )<br>CHCl <sub>3</sub><br>35/12 (CBP) | 432 (CBP film)       | 3277                                  | 0.92                   | 0.2002, 0.2176 | This work |
| <b>0I</b>       | 318/362                             | -5.68/-2.06    | 2.88                   | DMSO 0.34 (QY <sub>AE</sub> )<br>CHCl <sub>3</sub><br>35/11 (CBP) | 475 (CBP film)       | 4190                                  | 2.12                   | 0.1794, 0.2668 | This work |
| <b>0J</b>       | 321/317                             | -5.49/-2.42    | 2.46                   | DMSO 0.36 (QY <sub>AE</sub> )<br>CHCl <sub>3</sub><br>35/23 (CBP) | 566 (CBP film)       | 8962                                  | 4.29                   | 0.3802, 0.5643 | This work |
| <b>ACPI</b>     | 290/410                             | -5.62/-2.54    | -                      | 0.87/-                                                            | 456                  | 11470                                 | 3.52                   | 0.156, 0.155   | [3]       |
| <b>1-NaCPI</b>  | 345/441                             | -5.58/-2.56    | -                      | 0.71/-                                                            | 468                  | 16000                                 | 2.88                   | 0.165, 0.199   | [3]       |
| <b>2-NaCPI</b>  | 354/473                             | -5.55/-2.55    | -                      | 0.62/-                                                            | 460                  | 12250                                 | 3.61                   | 0.150, 0.160   | [3]       |
| <b>ANPI</b>     | 288/396                             | -5.76/-2.66    | -                      | 0.62/-                                                            | 472                  | 7554                                  | 1.56                   | 0.166, 0.213   | [4]       |
| <b>2-NaNPPI</b> | 365/469                             | -5.75/-2.64    | -                      | 0.61/-                                                            | 460                  | 9224                                  | 2.71                   | 0.154, 0.147   | [4]       |
| <b>PNPI</b>     | 230/446                             | -5.77/-2.45    | -                      | 0.48/-                                                            | 462                  | 12250                                 | 2.82                   | 0.153, 0.163   | [4]       |

|                      |         |             |      |                   |     |        |      |              |      |
|----------------------|---------|-------------|------|-------------------|-----|--------|------|--------------|------|
| <b>p-PABPI</b>       | -/511   | -5.59/-2.65 | 2.94 | -/0.74            | 444 | 9539   | 3.92 | 0.15,0.09    | [5]  |
| <b>m-PABPI</b>       | -/438   | -5.37/-2.39 | 2.98 | -/0.56            | 436 | 4091   | 2.24 | 0.15,0.04    | [5]  |
| <b>PIMNA</b>         | 297/371 | -5.62/-2.21 | 3.37 | 79/82             | 412 | 6580   | 2.21 | 0.160, 0.034 | [6]  |
| <b>1</b>             | -/363   | -6.20/-3.11 | 3.09 | 0.40/-            | 460 | 5168   | 0.83 | 0.16, 0.17   | [7]  |
| <b>2</b>             | -/400   | -6.08/-3.02 | 3.06 | 0.76/-            | 448 | 5118   | 0.85 | 0.15, 0.12   | [7]  |
| <b>1</b>             | 296/371 | -5.62/-2.21 | 3.37 | 77/82             | 412 | 6580   | 2.43 | 0.160, 0.035 | [8]  |
| <b>2</b>             | -/421   | -5.52/-2.52 | 3.01 | 90/57             | 448 | 54300  | 5.11 | 0.154, 0.141 | [8]  |
| <b>3</b>             | 326/386 | -5.62/-2.64 | 2.98 | 41/34             | 460 | 35600  | 2.29 | 0.164, 0.185 | [8]  |
| <b>BBAB</b>          | 205/280 | -5.67/-2.54 | 3.10 | -/0.42<br>(solid) | 448 | -      | 1.53 | 0.15, 0.12   | [9]  |
| <b>2N-PI</b>         | 220/363 | -5.33/-2.27 | 3.06 | -/0.70<br>(solid) | 448 | -      | 0.95 | 0.15, 0.11   | [9]  |
| <b>Anthracene-PI</b> | 325/337 | -5.51/-2.43 | 3.08 | -/0.82<br>(solid) | 472 | -      | 0.80 | 0.16, 0.24   | [9]  |
| <b>Ph-BPI</b>        | 244/351 | -5.41/-2.39 | 3.02 | -/0.65<br>(solid) | 448 | -      | 0.68 | 0.15, 0.10   | [9]  |
| <b>1N-BPI</b>        | 230/378 | -5.41/-2.38 | 3.03 | -/0.74<br>(solid) | 448 | -      | 0.60 | 0.14, 0.10   | [9]  |
| <b>2N-BPI</b>        | 196/386 | -5.27/-2.37 | 2.90 | -/0.88<br>(solid) | 448 | -      | 1.61 | 0.14, 0.11   | [9]  |
| <b>2N-API</b>        | 279/390 | -5.59/-2.37 | 3.13 | -/0.58<br>(solid) | 448 | -      | 1.47 | 0.15, 0.11   | [9]  |
| <b>Py-BPI</b>        | 300/429 | -5.35/-2.68 | 2.67 | -/0.80<br>(solid) | 468 | -      | 2.0  | 0.15, 0.19   | [9]  |
| <b>TPI</b>           | -/307   | -5.62/-2.35 | 3.27 | -/0.15            | 420 | -      | 0.96 | 0.163, 0.076 | [10] |
| <b>TPI-Bz</b>        | -/423   | -5.52/-2.40 | 3.12 | -/0.43            | 420 | -      | 1.45 | 0.162, 0.043 | [10] |
| <b>TPI-2Na</b>       | -/502   | -5.49/-2.43 | 3.06 | -/0.61            | 428 | -      | 1.98 | 0.161, 0.063 | [10] |
| <b>TPI-1Na</b>       | -/456   | -5.55/-2.39 | 3.16 | -/0.31            | 420 | -      | 0.83 | 0.184, 0.116 | [10] |
| <b>TPI-Ph</b>        | -/483   | -5.54/-2.38 | 3.16 | -/0.72            | 428 | -      | 3.72 | 0.158, 0.050 | [10] |
| <b>TPI-An</b>        | -/479   | -5.53/-2.56 | 2.97 | -/0.69            | 448 | -      | 3.39 | 0.200, 0.221 | [10] |
| <b>TPI-Py</b>        | -/542   | -5.50/-2.54 | 2.96 | -/0.93            | 460 | -      | 5.69 | 0.157, 0.177 | [10] |
| <b>1</b>             | 210/351 | -5.62/-2.64 | 3.16 | 60/62             | 404 | 36 823 | 2.13 | 0.16,0.13    | [11] |
| <b>2</b>             | 212/362 | -5.30/-2.26 | 3.04 | 63/68             | 417 | 38 032 | 2.26 | 0.15, 0.12   | [11] |
| <b>3</b>             | 220/401 | -5.29/-2.49 | 2.80 | 68/49             | 450 | 53 890 | 5.30 | 0.15,0.14    | [11] |

## 11. Literature

- [1] D. Gobel, N. Clamor, E. Lork, B. J. Nachtsheim, *Org. Lett.* 2019, 21, 5373–5377
- [2] F. J. Steemers, W. Verboom, D. N. Reinhoudt, E. B. van der Tol, J. W. Verhoeven, *J. Am. Chem. Soc.*, 1995, 117, 9408-9414.
- [3] S. Zhuang, R. Shanguan, J. Jin, G. Tu, L. Wang, J. Chen, D. Ma and X. Zhu, *Org. Electron.*, 2012, 13, 3050–3059.
- [4] S. Zhuang, R. Shanguan, H. Huang, G. Tu, L. Wang and X. Zhu, *Dyes Pigm.*, 2014, 101, 93–102.
- [5] J. Wang, X. Lou, Y. Liu, G. Zhao, A. Islam, S. Wang and Z. Ge, *Dyes Pigm.*, 2015, 118, 137–144.
- [6] T. Shan, Y. Liu, X. Tang, Q. Bai, Y. Gao, Z. Gao, J. Li, J. Deng, B. Yang, P. Lu and Y. Ma, *ACS Appl. Mater. Interfaces*, 2016, 8, 28771–28779.

- [7] F. Zhang, W. Li, D. Wei, X. Wei, Z. Li, S. Zhang, S. Li, B. Wei, G. Cao and B. Zhai, *RSC Adv.*, 2016, 6, 60264–60270.
- [8] T. Shan, Z. Gao, X. Tang, X. He, Y. Gao, J. Li, X. Sun, Y. Liu, H. Liu, B. Yang, P. Lu and Y. Ma, *Dyes Pigm.*, 2017, 142, 189–197.
- [9] Y. Zhang, J.-H. Wang, G. Han, F. Lu and Q.-X. Tong, *RSC Adv.*, 2016, 6, 70800–70809.
- [10] W.-C. Chen, Y. Yuan, Y. Xiong, A. L. Rogach, Q.-X. Tong and C.-S. Lee, *ACS Appl. Mater. Interfaces*, 2017, 9, 26268–26278.
- [11] J. Jayabharathi, R. Ramya, V. Thanikachalam and P. Nethaji, *RSC Adv.*, 2018, 8, 29031–29043.
